# Supplementary material for: Sequential Mukaiyama–Michael reaction induced by carbon acids
Source: Royal Society of Chemistry journal article supplement (doi:10.1039/c5cc10115h), 2015-12-21
Supplement: c5cc10115h1.pdf [file c5cc10115h1.pdf]

## Sequential Mukaiyama–Michael reaction induced by carbon acids

Hikaru Yanai,<sup>\*,a</sup> Osamu Kobayashi,<sup>a</sup> Kenji, Takada,<sup>b</sup> Takuya Isono,<sup>b</sup>

Toshifumi Satoh,<sup>b</sup> and Takashi Matsumoto<sup>\*,a</sup>

<sup>a</sup> School of Pharmacy, Tokyo University of Pharmacy and Life Sciences, 1432-1 Horinouchi, Hachioji, Tokyo 192-0392, Japan, <sup>b</sup> Faculty of Engineering, Hokkaido University, Sapporo, 060-8628, Japan.

Tel.: +81 426 76 3265, Fax: +81 426 76 3257, E-mail: yanai@toyaku.ac.jp (HY), tmatsumo@toyaku.ac.jp (TM)

### Electronic Supplementary Information

#### Table of contents

|                                                                       |        |
|-----------------------------------------------------------------------|--------|
| 1. General and materials                                              | p. S 1 |
| 2. Mukaiyama–Michael reaction of $\alpha,\beta$ -unsaturated lactones | p. S 2 |
| 3. Mukaiyama–Michael/Mukaiyama aldol reaction                         | p. S 3 |
| 4. Sequential Mukaiyama–Michael reaction                              | p. S 9 |
| 5. GTP studies by using carbon acids                                  | p. S23 |
| 6. X-ray crystallographic data                                        | p. S24 |
| 7. $^1\text{H}$ and $^{13}\text{C}$ NMR spectra                       | p. S34 |
| 8. References                                                         | p. S73 |

#### 1. General and materials

All reactions were carried out under Ar atmosphere. Melting points were uncorrected.  $^1\text{H}$  NMR spectra were recorded on a Bruker DPX400 (400 MHz) spectrometer or a Bruker Avance III 400 Nanobay spectrometer. Chemical shifts are reported in parts per million (ppm) using residual  $\text{CHCl}_3$  (7.26 ppm) as an internal standard. Data are reported as follows: chemical shifts, multiplicity (s = singlet, d = doublet, t = triplet, q = quartet, sex = sextet, m = multiplet), integration and coupling constants.  $^{13}\text{C}$  NMR spectra were recorded on a Bruker DPX400 (100 MHz) spectrometer or a Bruker Avance III 400 Nanobay spectrometer (100 MHz), using broadband proton decoupling. Chemical shifts are reported in ppm using the middle resonance of  $\text{CDCl}_3$  (77.01 ppm) as an internal standard.  $^{19}\text{F}$  NMR spectra were taken on a Bruker Avance III 400 Nanobay spectrometer (376 MHz), and chemical shifts were reported in ppm using trifluoromethylbenzene (0 ppm) as a standard. Mass spectra were recorded by a Micromass LCT spectrometer (ESI-TOF). Column chromatography was performed on neutral silica gel (Kanto Chemical, 75-150  $\mu\text{m}$ ). MPLC was performed using 40 x 300 mm i. d. pre-packed column (silica gel, 50  $\mu\text{m}$ ) with UV and RI detectors. Size exclusion chromatography (SEC) measurements for polymers were performed at 40 °C using a Jasco GPC-900 system equipped with two Shodex KF-804 L columns (linear, 8 mm x 300 mm) in THF at the flow rate of 1.0 mL min<sup>-1</sup>. The number average molecular weight ( $M_{n(\text{SEC})}$ ) and dispersity ( $M_w/M_n$ ) were determined using poly(methyl methacrylate) standards with the  $M_w$  ( $M_w/M_n$ )s of  $1.25 \times 10^6$  g mol<sup>-1</sup> (1.07),  $6.59 \times 10^5$  g mol<sup>-1</sup> (1.02),  $3.003 \times 10^5$  g mol<sup>-1</sup> (1.02),  $1.385 \times 10^5$  g mol<sup>-1</sup> (1.05),  $6.015 \times 10^4$  g mol<sup>-1</sup> (1.03),  $3.053 \times 10^4$  g mol<sup>-1</sup> (1.02), and  $1.155 \times 10^4$  g mol<sup>-1</sup> (1.04),  $4.90 \times 10^3$  g mol<sup>-1</sup> (1.10),  $2.87 \times 10^3$  g mol<sup>-1</sup> (1.06), and  $1.43 \times 10^3$  g mol<sup>-1</sup> (1.15).  $\text{Tf}_2\text{CH}_2$  was provided from Central Glass Co., Ltd. and it can be also prepared by the Waller's procedure in the laboratory.<sup>1</sup>

## 2. Mukaiyama–Michael reaction of $\alpha,\beta$ -unsaturated lactones

### Ethyl 2-(2-oxochroman-4-yl)acetate (**6a**)

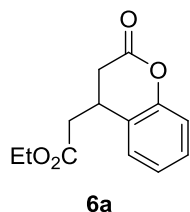

To a solution of 2*H*-chromen-2-one **3a** (72.7 mg, 0.497 mmol) and triple carbon acid **1a** (5.3 mg, 5.3  $\mu$ mol) in  $\text{CH}_2\text{Cl}_2$  (1.5 mL), a solution of *tert*-butyl((1-ethoxyvinyl)oxy)dimethylsilane **4** (125 mg, 0.618 mmol) in  $\text{CH}_2\text{Cl}_2$  (0.5 mL) was slowly added at  $-78^\circ\text{C}$ . After being stirred for 30 min at the same temperature, the reaction was quenched with saturated  $\text{NaHCO}_3$  aqueous solution (15 mL), then it was extracted with  $\text{Et}_2\text{O}$  (15 mL x 3) and washed with brine (15 mL). The combined organic layer was dried over anhydrous  $\text{MgSO}_4$  and concentrated under reduced pressure. Thus obtained residue was purified by column chromatography on silica gel (hexane/ $\text{EtOAc}$  = 5 : 1) to give the adduct<sup>2</sup> in 91% yield (106 mg, 0.453 mmol). Colorless crystals (from  $\text{EtOAc}$ /hexane); Mp. 50.0-52.5  $^\circ\text{C}$ ; IR (neat)  $\nu$  1762, 1715, 1145, 766  $\text{cm}^{-1}$ ;  $^1\text{H}$  NMR (400 MHz,  $\text{CDCl}_3$ )  $\delta$  1.23 (3H, t,  $J$  = 7.1 Hz), 2.56 (1H, dd,  $J$  = 16.1, 7.9 Hz), 2.65 (1H, dd,  $J$  = 16.1, 6.8 Hz), 2.82 (1H, dd,  $J$  = 16.1, 4.6 Hz), 2.90 (1H, dd,  $J$  = 16.1, 5.8 Hz), 3.53-3.62 (1H, m), 4.14 (2H, q,  $J$  = 7.1 Hz), 7.06 (1H, d,  $J$  = 8.1 Hz), 7.11 (1H, td,  $J$  = 7.5, 1.0 Hz), 7.22-7.32 (2H, m);  $^{13}\text{C}$  NMR (100 MHz,  $\text{CDCl}_3$ )  $\delta$  14.1, 31.5, 34.5, 39.0, 60.9, 117.2, 124.7, 125.0, 127.4, 128.9, 151.3, 167.5, 170.8; MS (ESI-TOF)  $m/z$  257  $[\text{M}+\text{Na}]^+$ ; HRMS calcd for  $\text{C}_{13}\text{H}_{14}\text{NaO}_3$   $[\text{M}+\text{Na}]^+$ , 257.0790; found, 257.0788. Anal. Calcd for  $\text{C}_{13}\text{H}_{14}\text{O}_3$ : C, 66.66; H, 6.02. Found: C, 66.81; H, 5.99.

### Ethyl 2-(5-iodo-2-oxo-6-phenyl-3,4-dihydro-2*H*-pyran-4-yl)acetate

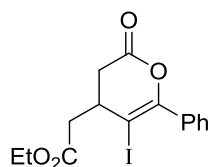

According to the synthetic procedure for **6a**, this compound was obtained in 96% yield (187 mg, 0.484 mmol) by the reaction of 5-iodo-6-phenyl-2*H*-pyran-2-one<sup>3</sup> **3f** (150 mg, 0.503 mmol) with *tert*-butyl((1-ethoxyvinyl)oxy)dimethylsilane **4** (127 mg, 0.628 mmol) in the presence of triple carbon acid **1a** (5.1 mg, 5.1  $\mu$ mol) in  $\text{CH}_2\text{Cl}_2$  (2.0 mL) for 30 min at  $-78^\circ\text{C}$  and the following column chromatography on silica gel (hexane/ $\text{EtOAc}$  = 5 : 1). Pale yellow oil; IR (neat)  $\nu$  2980, 1775, 1729, 1152, 1113, 1042, 1022, 698  $\text{cm}^{-1}$ ;  $^1\text{H}$  NMR (400 MHz,  $\text{CDCl}_3$ )  $\delta$  1.29 (3H, t,  $J$  = 7.2 Hz), 2.53 (1H, dd,  $J$  = 16.6, 9.8 Hz), 2.78 (1H, dd,  $J$  = 16.6, 3.6 Hz), 2.87 (1H, dd,  $J$  = 16.4, 7.2 Hz), 3.08 (1H, dd,  $J$  = 16.4, 2.6 Hz), 3.24-3.32 (1H, m), 4.19 (2H, q,  $J$  = 7.2 Hz), 7.35-7.42 (3H, m), 7.52-7.57 (2H, m);  $^{13}\text{C}$  NMR (100 MHz,  $\text{CDCl}_3$ )  $\delta$  14.2, 34.0, 36.5, 40.9, 61.2, 75.3, 128.1, 129.3, 129.8, 134.4, 150.9, 166.3, 170.4; MS (ESI-TOF)  $m/z$  387  $[\text{M}+\text{H}]^+$ ; HRMS calcd for  $\text{C}_{15}\text{H}_{16}\text{IO}_4$   $[\text{M}+\text{H}]^+$ , 387.0093; found, 387.0090. Anal. Calcd for  $\text{C}_{15}\text{H}_{15}\text{IO}_4$ : C, 46.65; H, 3.92. Found: C, 46.90; H, 4.04.

### 3. Mukaiyama–Michael/Mukaiyama aldol reaction

#### Ethyl 2-((3*R*\*,4*S*\*)-3-(1-((*tert*-butyldimethylsilyl)oxy)cyclohexyl)-2-oxochroman-4-yl)acetate (**7a**)

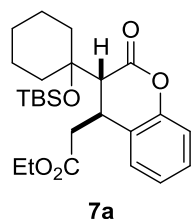

To a solution of 2*H*-chromen-2-one **3a** (146 mg, 0.999 mmol) and triple carbon acid **1a** (10 mg, 10  $\mu$ mol) in  $\text{CH}_2\text{Cl}_2$  (3.0 mL), a solution of *tert*-butyl((1-ethoxyvinyl)oxy)dimethylsilane **4** (243 mg, 1.20 mmol) in  $\text{CH}_2\text{Cl}_2$  (0.5 mL) was added at  $-78^\circ\text{C}$ . After being stirred for 30 min, a solution of cyclohexanone (199 mg, 2.03 mmol) in  $\text{CH}_2\text{Cl}_2$  (0.5 mL) was added to the reaction mixture and it was additionally stirred for 30 min at the same temperature. Then, the resulting mixture was quenched with saturated  $\text{NaHCO}_3$  aqueous solution (15 mL), extracted with  $\text{Et}_2\text{O}$  (15 mL  $\times$  3), and washed with brine (15 mL). The combined organic layer was dried over anhydrous  $\text{MgSO}_4$  and concentrated under reduced pressure. Thus obtained residue was purified by flash column chromatography on silica gel (hexane/ $\text{EtOAc}$  = 20 : 1) to give the adduct in 99% yield (443 mg, 0.993 mmol). Its structure was also confirmed by an X-ray crystallographic analysis. Colorless crystals (from  $\text{EtOAc}$ ); Mp.  $90.0\text{--}91.5^\circ\text{C}$ ; IR (ATR)  $\nu$  2928, 1750, 1732, 1151, 773  $\text{cm}^{-1}$ ;  $^1\text{H}$  NMR (400 MHz,  $\text{CDCl}_3$ )  $\delta$   $-0.44$  (3H, s),  $0.05$  (3H, s),  $0.70$  (9H, s),  $1.20$  (3H, t,  $J = 7.1$  Hz),  $1.28\text{--}1.38$  (1H, m),  $1.38\text{--}1.49$  (2H, m),  $1.49\text{--}1.62$  (3H, m),  $1.65\text{--}1.75$  (2H, m),  $1.93\text{--}2.06$  (2H, m),  $2.48$  (1H, dd,  $J = 15.9, 7.4$  Hz),  $2.54$  (1H, dd,  $J = 15.9, 7.4$  Hz),  $3.10$  (1H, s),  $3.64$  (1H, t,  $J = 7.4$  Hz),  $4.10$  (2H, q,  $J = 7.1$  Hz),  $6.94$  (1H, d,  $J = 8.0$  Hz),  $7.04$  (1H, t,  $J = 7.4$  Hz),  $7.16\text{--}7.23$  (2H, m);  $^{13}\text{C}$  NMR (100 MHz,  $\text{CDCl}_3$ )  $\delta$   $-1.6, -0.7, 15.1, 19.2, 24.1, 24.6, 26.3, 26.9, 33.9, 37.7, 38.9, 42.8, 52.0, 61.8, 78.5, 118.0, 125.4, 125.7, 128.6, 129.2, 152.3, 169.1, 171.9$ ; MS (ESI-TOF)  $m/z$  469  $[\text{M}+\text{Na}]^+$ ; HRMS calcd for  $\text{C}_{25}\text{H}_{38}\text{NaO}_5\text{Si}$   $[\text{M}+\text{Na}]^+$ , 469.2386; found, 469.2383. Anal. Calcd for  $\text{C}_{25}\text{H}_{38}\text{O}_5\text{Si}$ : C, 67.23; H, 8.58. Found: C, 66.98; H, 8.62.

#### Ethyl 2-((3*R*\*,4*S*\*)-3-(1-((*tert*-butyldimethylsilyl)oxy)cyclopentyl)-2-oxochroman-4-yl)acetate (**8a**)

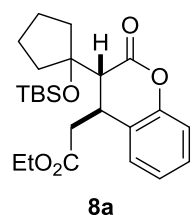

According to the synthetic procedure for **7a**, this compound was obtained in 87% yield (375 mg, 0.867 mmol) by the reaction of 2*H*-chromen-2-one **3a** (146 mg, 0.999 mmol), *tert*-butyl((1-ethoxyvinyl)oxy)dimethylsilane **4** (243 mg, 1.20 mmol), and cyclopentanone (171 mg, 2.03 mmol) in the presence of triple carbon acid **1a** (10 mg, 10  $\mu$ mol) in  $\text{CH}_2\text{Cl}_2$  (4.0 mL) at  $-78^\circ\text{C}$  for 30 min and the following flash column chromatography on silica gel (hexane/ $\text{EtOAc}$  = 20 : 1). Relative configuration of this compound was assigned by its NOESY spectrum. Colorless oil; IR (neat)  $\nu$  2951, 2851, 1760, 1737, 1220, 1168, 1062, 837, 777  $\text{cm}^{-1}$ ;  $^1\text{H}$  NMR (400 MHz,  $\text{CDCl}_3$ )  $\delta$   $-0.02$  (3H, s),  $0.07$  (3H, s),  $0.80$  (9H, s),  $1.11\text{--}1.19$  (1H, m),  $1.19$  (3H, t,  $J = 7.2$  Hz),  $1.34\text{--}1.44$  (1H, m),  $1.45\text{--}1.81$  (5H, m),  $2.03\text{--}2.15$  (1H, m),  $2.48$  (1H, dd,  $J = 15.6, 8.0$  Hz),  $2.55$  (1H, dd,  $J = 15.6, 6.9$  Hz),  $2.99$

(1H, d,  $J = 0.9$  Hz), 3.90 (1H, m), 4.08 (2H, q,  $J = 7.2$  Hz), 6.96 (1H, d,  $J = 8.0$  Hz), 7.07 (1H, t,  $J = 7.5$  Hz), 7.17-7.25 (2H, m);  $^{13}\text{C}$  NMR (100 MHz,  $\text{CDCl}_3$ )  $\delta$  -2.78, -2.73, 14.1, 18.3, 22.1, 23.5, 25.9, 33.6, 37.78, 37.82, 42.0, 54.3, 60.8, 85.7, 116.7, 124.5, 124.7, 128.4, 128.5, 151.1, 168.1, 170.7; MS (ESI-TOF)  $m/z$  433  $[\text{M}+\text{H}]^+$ ; HRMS calcd for  $\text{C}_{24}\text{H}_{37}\text{O}_5\text{Si}$   $[\text{M}+\text{H}]^+$ , 433.2410; found, 433.2417. Anal. Calcd for  $\text{C}_{24}\text{H}_{36}\text{O}_5\text{Si}$ : C, 66.63; H, 8.39. Found: C, 66.42; H, 8.45.

**Ethyl 2-((3*R*\*,4*S*\*)-3-(2-((*tert*-butyldimethylsilyl)oxy)propan-2-yl)-2-oxochroman-4-yl)acetate (**9a**)**

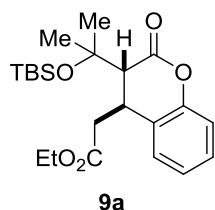

According to the synthetic procedure for **7a**, this compound was obtained in 97% yield (396 mg, 0.974 mmol) by the reaction of 2*H*-chromen-2-one **3a** (146 mg, 0.999 mmol), *tert*-butyl((1-ethoxyvinyl)oxy)dimethylsilane **4** (247 mg, 1.22 mmol), and acetone (118 mg, 2.03 mmol) in the presence of triple carbon acid **1a** (10 mg, 10  $\mu\text{mol}$ ) in  $\text{CH}_2\text{Cl}_2$  (4.0 mL) at  $-78^\circ\text{C}$  for 30 min and the following column chromatography on silica gel (hexane/EtOAc = 15 : 1). Relative configuration of this compound was assigned by its NOESY spectrum. Colorless oil; IR (neat)  $\nu$  2936, 2853, 1764, 1736, 1253, 1221, 1162, 1038, 838, 779  $\text{cm}^{-1}$ ;  $^1\text{H}$  NMR (400 MHz,  $\text{CDCl}_3$ )  $\delta$  -0.14 (3H, s), 0.02 (3H, s), 0.77 (9H, s), 1.11 (3H, s), 1.20 (3H, t,  $J = 7.2$  Hz), 1.40 (3H, s), 2.48 (1H, dd,  $J = 15.9, 7.2$  Hz), 2.56 (1H, dd,  $J = 15.9, 7.2$  Hz), 2.80 (1H, d,  $J = 0.9$  Hz), 3.85 (1H, brt,  $J = 7.2$  Hz), 4.08 (2H, q,  $J = 7.2$  Hz), 7.07-7.09 (1H, m), 7.12-7.15 (1H, m), 7.18-7.22 (2H, m);  $^{13}\text{C}$  NMR (100 MHz,  $\text{CDCl}_3$ )  $\delta$  -2.5, -2.2, 14.1, 18.0, 25.7, 28.4, 29.8, 33.4, 42.0, 57.1, 60.8, 74.9, 116.8, 124.4, 124.6, 128.0, 128.4, 151.2, 167.7, 170.8; MS (ESI-TOF)  $m/z$  407  $[\text{M}+\text{H}]^+$ ; HRMS calcd for  $\text{C}_{22}\text{H}_{35}\text{O}_5\text{Si}$   $[\text{M}+\text{H}]^+$ , 407.2254; found, 407.2258. Anal. Calcd for  $\text{C}_{22}\text{H}_{34}\text{O}_5\text{Si}$ : C, 64.99; H, 8.43. Found: C, 64.94; H, 8.48.

**Ethyl 2-((3*R*\*,4*S*\*)-3-((1*R*\*,2*S*\*)-1-((*tert*-butyldimethylsilyl)oxy)-2-methylcyclohexyl)-2-oxochroman-4-yl)acetate (**3,1'-anti-10a**) and ethyl 2-((3*R*\*,4*S*\*)-3-((1*S*\*,2*S*\*)-1-((*tert*-butyldimethylsilyl)oxy)-2-methylcyclohexyl)-2-oxochroman-4-yl)acetate (**3,1'-syn-10a**)**

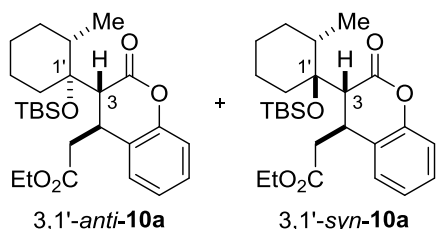

According to the synthetic procedure for **7a**, these compounds were obtained in 82% yield (380 mg, 0.794 mmol, 3'1'-*anti/syn* = 8.1 : 1) by the reaction of 2*H*-chromen-2-one **3a** (146 mg, 0.999 mmol), *tert*-butyl((1-ethoxyvinyl)oxy)dimethylsilane **4** (242 mg, 1.20 mmol), and 2-methylcyclohexanone (170 mg, 1.52 mmol) in the presence of triple carbon acid **1a** (10 mg, 10  $\mu\text{mol}$ ) in  $\text{CH}_2\text{Cl}_2$  (4.0 mL) at  $-78^\circ\text{C}$  for 30 min and the following column chromatography on silica gel (hexane/EtOAc = 15 : 1). Additional recycling HPLC (hexane/EtOAc = 15 : 1) was effective for separation the diastereomers to give less polar isomer **3,1'-syn-10a**

(41.7 mg, 90.5  $\mu$ mol, 9.1% yield) and more polar one 3,1'-*anti*-**10a** (338 mg, 0.734 mmol, 73% yield). The configurations of both diastereomers were assigned by their NOESY spectra.

For 3,1'-*syn*-**10a** Colorless oil; IR (neat)  $\nu$  2935, 2852, 1763, 1738, 1459, 1222, 1167, 1063, 837, 774  $\text{cm}^{-1}$ ;  $^1\text{H}$  NMR (400 MHz,  $\text{CDCl}_3$ )  $\delta$  0.22 (3H, s), 0.24 (3H, s), 0.75-0.85 (1H, m), 0.96 (9H, s), 1.04-1.13 (1H, m), 1.11 (3H, d,  $J$  = 6.5 Hz), 1.16 (3H, t,  $J$  = 7.1 Hz), 1.19-1.28 (2H, m), 1.30-1.44 (3H, m), 1.52 (1H, brd,  $J$  = 12.8 Hz), 1.62-1.72 (1H, m), 2.49 (1H, dd,  $J$  = 15.2, 10.1 Hz), 2.56 (1H, dd,  $J$  = 15.2, 4.6 Hz), 3.17 (1H, s), 3.82 (1H, dd,  $J$  = 10.1, 4.6 Hz), 4.05 (2H, q,  $J$  = 7.1 Hz), 6.97 (1H, d,  $J$  = 7.9 Hz), 7.03-7.09 (1H, m), 7.22 (1H, d,  $J$  = 7.5 Hz), 7.22-7.26 (1H, m);  $^{13}\text{C}$  NMR (100 MHz,  $\text{CDCl}_3$ )  $\delta$  -1.5, 14.0, 16.2, 19.7, 21.6, 25.0, 26.5, 30.5, 32.4, 34.2, 396.1, 42.7, 53.3, 60.7, 81.0, 116.5, 124.67, 124.70, 128.1, 128.7, 150.08, 167.4, 170.5; MS (ESI-TOF)  $m/z$  406  $[\text{M}+\text{Na}]^+$ ; HRMS calcd for  $\text{C}_{26}\text{H}_{40}\text{NaO}_5\text{Si}$   $[\text{M}+\text{Na}]^+$ , 483.2543; found, 483.2548. Anal. Calcd for  $\text{C}_{26}\text{H}_{40}\text{O}_5\text{Si}$ : C, 67.79; H, 8.75. Found: C, 68.00; H, 8.85.

For 3,1'-*anti*-**10a** Colorless oil; IR (neat)  $\nu$  2978, 2851, 1769, 1732, 1460, 1142, 1087, 839, 778, 760  $\text{cm}^{-1}$ ;  $^1\text{H}$  NMR (400 MHz,  $\text{CDCl}_3$ )  $\delta$  0.09 (3H, s), 0.16 (3H, s), 0.67-0.78 (1H, m), 0.87-0.96 (1H, m), 0.90 (9H, s), 0.99 (3H, d,  $J$  = 6.6 Hz), 1.15-1.24 (1H, m), 1.20 (3H, t,  $J$  = 7.2 Hz), 1.33-1.69 (6H, m), 2.50 (2H, d,  $J$  = 7.6 Hz), 3.19 (1H, d,  $J$  = 0.8 Hz), 3.52-3.61 (1H, m), 4.03-4.17 (2H, m), 6.98 (1H, d,  $J$  = 7.5 Hz), 7.08 (1H, td,  $J$  = 7.5, 0.9 Hz), 7.21 (1H, d,  $J$  = 7.5 Hz), 7.23-7.29 (1H, m);  $^{13}\text{C}$  NMR (100 MHz,  $\text{CDCl}_3$ )  $\delta$  -2.0, -1.7, 14.1, 15.5, 19.7, 21.4, 24.5, 26.7, 30.5, 34.2, 34.7, 38.0, 41.8, 54.3, 60.9, 80.2, 116.7, 124.1, 124.6, 128.0, 128.9, 151.4, 167.7, 170.7; MS (ESI-TOF)  $m/z$  406  $[\text{M}+\text{Na}]^+$ ; HRMS calcd for  $\text{C}_{26}\text{H}_{40}\text{NaO}_5\text{Si}$   $[\text{M}+\text{Na}]^+$ , 483.2543; found, 483.2549. Anal. Calcd for  $\text{C}_{26}\text{H}_{40}\text{O}_5\text{Si}$ : C, 67.79; H, 8.75. Found: C, 67.59; H, 8.80.

**Ethyl 2-((3*R*\*,4*S*\*)-6-bromo-3-(2-((*tert*-butyldimethylsilyl)oxy)propan-2-yl)-2-oxochroman-4-yl)acetate (9b)**

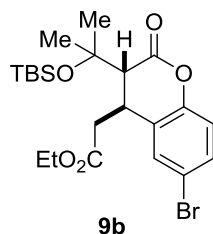

Due to low solubility of the starting lactone **3b**, this reaction was conducted under highly diluted conditions. To a solution of 6-bromo-2*H*-chromen-2-one<sup>4</sup> **3b** (112 mg, 0.498 mmol) and triple carbon acid **1a** (4.9 mg, 4.9  $\mu$ mol) in  $\text{CH}_2\text{Cl}_2$  (9.0 mL), a solution of *tert*-butyl((1-ethoxyvinyl)oxy)dimethylsilane **4** (125 mg, 0.618 mmol) in  $\text{CH}_2\text{Cl}_2$  (0.5 mL) was added at -78  $^\circ\text{C}$ . After being stirred for 30 min, a solution of acetone (55  $\mu\text{L}$ , 0.75 mmol) in  $\text{CH}_2\text{Cl}_2$  (0.5 mL) was added to the reaction mixture and it was additionally stirred for 30 min at the same temperature. After usual extractive workup, the obtained residue was purified by column chromatography on silica gel (hexane/EtOAc = 10 : 1) to give the adduct in 89% yield (214 mg, 0.441 mmol). Relative configuration of this compound was assigned by its NOESY spectrum. Colorless oil; IR (neat)  $\nu$  2939, 2854, 1766, 1734, 1479, 1163, 1034, 838, 778  $\text{cm}^{-1}$ ;  $^1\text{H}$  NMR (400 MHz,  $\text{CDCl}_3$ )  $\delta$  -0.13 (3H, s), 0.03 (3H, s), 0.75 (9H, s), 1.17 (3H, s), 1.21 (3H, t,  $J$  = 7.1 Hz), 1.41 (3H, s), 2.49 (1H, dd,  $J$  = 16.1, 7.0 Hz), 2.56 (1H, dd,  $J$  = 16.1, 7.3 Hz), 2.77 (1H, d,  $J$  = 0.8 Hz), 3.76-3.83 (1H, m), 4.07-4.15 (2H, m), 6.86 (1H, brd,  $J$  = 7.8 Hz), 7.31-7.35 (1H, m), 7.34 (1H, s);  $^{13}\text{C}$  NMR (100 MHz,  $\text{CDCl}_3$ )  $\delta$  -0.3, -0.0, 16.3, 20.2, 27.9, 30.9, 31.6, 35.5,

44.0, 59.0, 63.2, 77.2, 119.1, 120.7, 128.8, 132.9, 133.5, 152.6, 169.2, 172.7; MS (ESI-TOF)  $m/z$  507  $[M+Na]^+$ , 509  $[M+2+Na]^+$ ; HRMS calcd for  $C_{22}H_{33}BrNaO_5Si$   $[M+Na]^+$ , 507.1178; found, 507.1184. Anal. Calcd for  $C_{22}H_{33}BrO_5Si$ : C, 54.43; H, 6.85. Found: C, 54.20; H, 6.84.

**Ethyl 2-((3*R*\*,4*S*\*)-7-bromo-3-(2-((*tert*-butyldimethylsilyl)oxy)propan-2-yl)-2-oxochroman-4-yl)acetate (9c)**

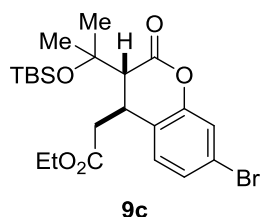

According to the synthetic procedure for **9b**, this compound was obtained in 89% yield (214 mg, 0.441 mmol) by the reaction of 7-bromo-2*H*-chromen-2-one<sup>4</sup> **3c** (112 mg, 0.498 mmol), *tert*-butyl((1-ethoxyvinyl)oxy)dimethylsilane **4** (122 mg, 0.603 mmol), and acetone (55  $\mu$ L, 0.75 mmol) in the presence of triple carbon acid **1a** (5.0 mg, 5.0  $\mu$ mol) in  $CH_2Cl_2$  (10 mL) at  $-78^\circ C$  for 30 min and the following column chromatography on silica gel (hexane/EtOAc = 10 : 1). Relative configuration of this compound was assigned by its NOESY spectrum. Pale yellow oil; IR (neat)  $\nu$  2950, 2930, 2850, 1750, 1730, 1600, 1580, 1480, 1405, 1160, 940, 835, 775  $cm^{-1}$ ;  $^1H$  NMR (400 MHz,  $CDCl_3$ )  $\delta$  -0.14 (3H, s), 0.03 (3H, s), 0.75 (9H, s), 1.15 (3H, s), 1.20 (3H, t,  $J = 7.1$  Hz), 1.40 (3H, s), 2.47 (1H, dd,  $J = 16.1, 7.2$  Hz), 2.53 (1H, dd,  $J = 16.1, 7.2$  Hz), 2.77 (1H, d,  $J = 0.8$  Hz), 3.81 (1H, brt,  $J = 7.2$  Hz), 4.09 (2H, q,  $J = 7.1$  Hz), 7.08 (1H, d,  $J = 8.1$  Hz), 7.13 (1H, d,  $J = 1.9$  Hz), 7.20 (1H, dd,  $J = 8.1, 1.9$  Hz);  $^{13}C$  NMR (100 MHz,  $CDCl_3$ )  $\delta$  -2.5, -2.2, 14.1, 18.0, 25.6, 28.6, 29.6, 33.0, 41.7, 56.8, 60.9, 75.0, 120.1, 121.2, 123.6, 127.6, 129.3, 151.8, 166.9, 170.6; MS (ESI-TOF)  $m/z$  507  $[M+Na]^+$ , 509  $[M+2+Na]^+$ ; HRMS calcd for  $C_{22}H_{33}BrNaO_5Si$   $[M+Na]^+$ , 507.1178; found, 507.1183. Anal. Calcd for  $C_{22}H_{33}BrO_5Si$ : C, 54.43; H, 6.85. Found: C, 54.22; H, 6.90.

**Ethyl 2-((3*R*\*,4*S*\*)-3-(2-((*tert*-butyldimethylsilyl)oxy)propan-2-yl)-6-methyl-2-oxochroman-4-yl)acetate (9d)**

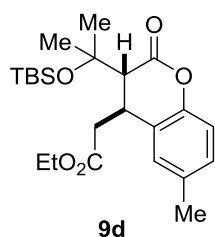

According to the synthetic procedure for **7a**, this compound was obtained in 90% yield (190 mg, 0.452 mmol) by the reaction of 6-methyl-2*H*-chromen-2-one **3d** (80.1 mg, 0.500 mmol), *tert*-butyl((1-ethoxyvinyl)oxy)dimethylsilane **4** (122 mg, 0.603 mmol), and acetone (55  $\mu$ L, 0.75 mmol) in the presence of triple carbon acid **1a** (5.0 mg, 5.0  $\mu$ mol) in  $CH_2Cl_2$  (4.0 mL) at  $-78^\circ C$  for 30 min and the following column chromatography on silica gel (hexane/EtOAc = 10 : 1). Relative configuration of this compound was assigned by its NOESY spectrum. Colorless oil; IR (neat)  $\nu$  2932, 2852, 1759, 1736, 1498, 1214, 1162, 1036, 837, 778  $cm^{-1}$ ;  $^1H$  NMR (400 MHz,  $CDCl_3$ )  $\delta$  -0.01 (3H, s), 0.03 (3H, s), 0.78 (9H, s), 1.10 (3H, s),

1.20 (3H, s), 1.40 (3H, s), 2.30 (3H, s), 2.48 (1H, dd,  $J = 15.8, 7.2$  Hz), 2.54 (1H, dd,  $J = 15.8, 7.2$  Hz), 2.78 (1H, brs), 3.80 (1H, t,  $J = 7.2$  Hz), 4.10 (2H, q,  $J = 7.2$  Hz), 6.85 (1H, d,  $J = 8.1$  Hz), 6.97-7.03 (1H, m), 6.99 (1H, s);  $^{13}\text{C}$  NMR (100 MHz,  $\text{CDCl}_3$ )  $\delta$  -1.5, -1.2, 15.1, 19.0, 21.7, 26.7, 29.3, 30.9, 34.4, 43.0, 58.1, 61.7, 75.9, 117.4, 125.0, 129.3, 130.0, 135.2, 150.1, 169.0, 171.9; MS (ESI-TOF)  $m/z$  443  $[\text{M}+\text{Na}]^+$ ; HRMS calcd for  $\text{C}_{23}\text{H}_{36}\text{NaO}_5\text{Si}$   $[\text{M}+\text{Na}]^+$ , 443.2230; found, 443.2246. Anal. Calcd for  $\text{C}_{23}\text{H}_{36}\text{O}_5\text{Si}$ : C, 65.68; H, 8.63. Found: C, 65.38; H, 8.63.

**Ethyl 2-((3*R*\*,4*S*\*)-3-(2-((*tert*-butyldimethylsilyl)oxy)propan-2-yl)-6-nitro-2-oxochroman-4-yl)acetate (9e)**

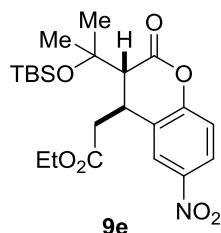

To a solution of 6-nitro-2*H*-chromen-2-one<sup>5</sup> **3e** (95.6 mg, 0.500 mmol) and triple carbon acid **1a** (15 mg, 15  $\mu\text{mol}$ ) in  $\text{CH}_2\text{Cl}_2$  (9.0 mL), a solution of *tert*-butyl((1-ethoxyvinyl)oxy)dimethylsilane **4** (155 mg, 0.766 mmol) in  $\text{CH}_2\text{Cl}_2$  (0.5 mL) was added at  $-78^\circ\text{C}$ . After being stirred for 30 min, the reaction mixture was treated with a solution of acetone (74  $\mu\text{L}$ , 1.0 mmol) in  $\text{CH}_2\text{Cl}_2$  (0.5 mL) for 30 min at the same temperature. Since a small amount of *in situ*-generated KSA was observed by TLC analysis at this stage, further acetone (74  $\mu\text{L}$ , 1.0 mmol) was added to the reaction mixture and the resulting mixture was stirred for 30 min at  $-78^\circ\text{C}$ . After usual extractive workup, the obtained residue was purified by column chromatography on silica gel (hexane/EtOAc = 6 : 1) to give the adduct in 90% yield (183 mg, 0.451 mmol). Relative configuration of this compound was assigned by its NOESY spectrum. Pale yellow oil; IR (neat)  $\nu$  2960, 2930, 2850, 1770, 1730, 1530, 1340, 1250, 1160, 1030, 838, 780  $\text{cm}^{-1}$ ;  $^1\text{H}$  NMR (400 MHz,  $\text{CDCl}_3$ )  $\delta$  -0.21 (3H, s), 0.02 (3H, s), 0.71 (9H, s), 1.22 (3H, t,  $J = 7.1$  Hz), 1.24 (3H, s), 1.44 (3H, s), 2.54 (1H, dd,  $J = 16.5, 6.6$  Hz), 2.64 (1H, dd,  $J = 16.5, 7.2$  Hz), 2.82 (1H, d,  $J = 0.4$  Hz), 3.89-3.95 (1H, m), 4.11 (2H, q,  $J = 7.1$  Hz), 7.09 (1H, d,  $J = 7.1$  Hz), 8.11-8.17 (2H, m);  $^{13}\text{C}$  NMR (100 MHz,  $\text{CDCl}_3$ )  $\delta$  -2.5, -2.3, 14.1, 18.0, 25.7, 29.0, 29.4, 33.3, 41.7, 56.4, 61.2, 75.2, 117.7, 123.9, 124.3, 125.7, 144.2, 155.9, 165.9, 170.2; MS (ESI-TOF)  $m/z$  474  $[\text{M}+\text{Na}]^+$ ; HRMS calcd for  $\text{C}_{22}\text{H}_{33}\text{NNaO}_7\text{Si}$   $[\text{M}+\text{Na}]^+$ , 474.1924; found, 474.1933. Anal. Calcd for  $\text{C}_{22}\text{H}_{33}\text{NO}_7\text{Si}$ : C, 58.51; H, 7.37; N, 3.10. Found: C, 58.75; H, 7.58; N, 3.12.

**Ethyl 2-((3*R*\*,4*S*\*)-3-(2-((*tert*-butyldimethylsilyl)oxy)propan-2-yl)-5-iodo-2-oxo-6-phenyl-3,4-dihydro-2*H*-pyran-4-yl)acetate (9f)**

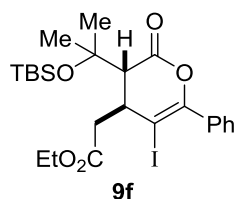

According to the synthetic procedure for **7a**, this compound was obtained in 90% yield (251 mg, 0.449 mmol) by the reaction of 5-iodo-6-phenyl-2*H*-pyran-2-one<sup>3</sup> **3f** (149 mg, 0.500 mmol),

*tert*-butyl((1-ethoxyvinyl)oxy)dimethylsilane **4** (124 mg, 0.613 mmol), and acetone (55  $\mu$ L, 0.75 mmol) in the presence of triple carbon acid **1a** (5.1 mg, 5.1  $\mu$ mol) in  $\text{CH}_2\text{Cl}_2$  (2.0 mL) at  $-78^\circ\text{C}$  for 30 min and the following column chromatography on silica gel (hexane/EtOAc = 6 : 1). Relative configuration of this compound was assigned by its NOESY spectrum. Yellow crystals (from  $\text{CH}_2\text{Cl}_2$ ); Mp.  $37.0\text{--}38.5^\circ\text{C}$ ; IR (ATR)  $\nu$  2956, 2927, 2853, 1760, 1729, 1148, 1045, 831, 771, 698  $\text{cm}^{-1}$ ;  $^1\text{H}$  NMR (400 MHz,  $\text{CDCl}_3$ )  $\delta$  0.14 (3H, s), 0.17 (3H, s), 0.89 (9H, s), 1.27 (3H, t,  $J = 7.2$  Hz), 1.40 (3H, s), 1.50 (3H, s), 2.55 (1H, dd,  $J = 16.2, 4.4$  Hz), 2.82 (1H, dd,  $J = 16.2, 6.8$  Hz), 2.89 (1H, brs), 3.57 (1H, ddd,  $J = 6.8, 4.4, 0.9$  Hz), 4.12–4.21 (2H, m), 7.36–7.40 (3H, m), 7.48–7.53 (2H, m);  $^{13}\text{C}$  NMR (100 MHz,  $\text{CDCl}_3$ )  $\delta$   $-1.2, -1.0, 15.2, 19.1, 26.8, 27.9, 30.9, 39.5, 43.7, 58.7, 62.0, 76.0, 77.3, 129.0, 130.1, 130.7, 135.7, 150.6, 167.5, 171.6$ ; MS (ESI-TOF)  $m/z$  581  $[\text{M}+\text{Na}]^+$ ; HRMS calcd for  $\text{C}_{24}\text{H}_{35}\text{INaO}_5\text{Si}$   $[\text{M}+\text{Na}]^+$ , 581.1196; found, 581.1193. Anal. Calcd for  $\text{C}_{24}\text{H}_{35}\text{IO}_5\text{Si}$ : C, 51.61; H, 6.32. Found: C, 51.57; H, 6.44.

**Ethyl 2-((3*R*\*,4*S*\*)-3-(2-((*tert*-butyldimethylsilyl)oxy)propan-2-yl)-2-oxo-6-phenyl-5-(phenylethynyl)-3,4-dihydro-2*H*-pyran-4-yl)acetate (**9g**)**

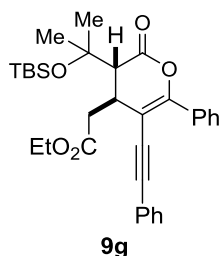

According to the synthetic procedure for **7a**, this compound was obtained in 86% yield (231 mg, 0.434 mmol) by the reaction of 6-phenyl-5-(phenylethynyl)-2*H*-pyran-2-one **3g** (137 mg, 0.503 mmol), *tert*-butyl((1-ethoxyvinyl)oxy)dimethylsilane **4** (185 mg, 0.916 mmol), and acetone (74  $\mu$ L, 1.0 mmol) in the presence of triple carbon acid **1a** (9.9 mg, 9.9  $\mu$ mol) in  $\text{CH}_2\text{Cl}_2$  (4.0 mL) at  $-78^\circ\text{C}$  for 30 min and the following column chromatography on silica gel (hexane/EtOAc = 10 : 1). Relative configuration of this compound was assigned by its NOESY spectrum. Yellow oil; IR (neat)  $\nu$  2961, 2926, 2852, 1764, 1729, 1159, 1035, 837, 778, 696  $\text{cm}^{-1}$ ;  $^1\text{H}$  NMR (400 MHz,  $\text{CDCl}_3$ )  $\delta$  0.12 (3H, s), 0.13 (3H, s), 0.86 (9H, s), 1.24 (3H, t,  $J = 7.2$  Hz), 1.37 (3H, s), 1.50 (3H, s), 2.66 (1H, dd,  $J = 16.0, 5.5$  Hz), 2.72 (1H, dd,  $J = 16.0, 7.6$  Hz), 2.82 (1H, d,  $J = 0.7$  Hz), 3.50–3.56 (1H, m), 4.14 (2H, q,  $J = 7.2$  Hz), 7.31–7.36 (3H, m), 7.38–7.44 (5H, m), 8.01–8.05 (2H, m);  $^{13}\text{C}$  NMR (100 MHz,  $\text{CDCl}_3$ )  $\delta$   $-2.14, -2.12, 14.1, 18.1, 25.8, 27.4, 30.1, 35.8, 39.1, 55.9, 60.9, 75.0, 86.7, 95.5, 99.8, 123.2, 127.5, 127.9, 128.3, 128.4, 129.6, 131.2, 132.2, 152.8, 166.6, 171.0$ ; MS (ESI-TOF)  $m/z$  555  $[\text{M}+\text{Na}]^+$ ; HRMS calcd for  $\text{C}_{32}\text{H}_{40}\text{NaO}_5\text{Si}$   $[\text{M}+\text{Na}]^+$ , 555.2543; found, 555.2543. Anal. Calcd for  $\text{C}_{32}\text{H}_{40}\text{O}_5\text{Si}$ : C, 72.14; H, 7.57. Found: C, 71.99; H, 7.60.



#### 4. Sequential Mukaiyama–Michael reaction

##### Ethyl 2-((3*S*\*,4*S*\*)-2-oxo-3-(3-oxobutyl)chroman-4-yl)acetate (**11a**)

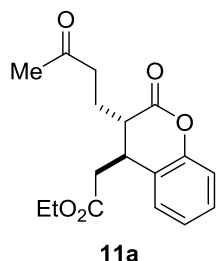

To a solution of 2*H*-chromen-2-one **3a** (73.0 mg, 0.499 mmol) and triple carbon acid **1a** (5.1 mg, 5.1  $\mu$ mol) in CH<sub>2</sub>Cl<sub>2</sub> (1.0 mL), a solution of *tert*-butyl((1-ethoxyvinyl)oxy)dimethylsilane **4** (123 mg, 0.608 mmol) in CH<sub>2</sub>Cl<sub>2</sub> (0.5 mL) was added at  $-78^{\circ}\text{C}$ . After being stirred for 30 min, a solution of freshly distilled methyl vinyl ketone (63  $\mu$ L, 0.76 mmol) in CH<sub>2</sub>Cl<sub>2</sub> (0.5 mL) was added to the reaction mixture over 1 h using a syringe pump. This mixture was additionally stirred for 30 min at  $-78^{\circ}\text{C}$ , then the resultant was treated with a 2% hydrochloric acid (5.0 mL) for 30 min at room temperature. After extractive workup and evaporation, thus obtained residue was purified by column chromatography on silica gel (hexane/EtOAc = 3 : 1) to give this product in 59% yield (90.1 mg, 0.296 mmol) along with isolation of simple Michael adduct **6a** (24.1 mg, 0.103 mmol, 21% yield). Relative configuration of this compound was assigned by its NOESY spectrum. Colorless crystals (from CH<sub>2</sub>Cl<sub>2</sub>); Mp.  $34.0\text{--}35.0^{\circ}\text{C}$ ; IR (ATR)  $\nu$  1767, 1709, 1219, 1174, 1137, 757  $\text{cm}^{-1}$ ; <sup>1</sup>H NMR (400 MHz, CDCl<sub>3</sub>)  $\delta$  1.21 (3H, t,  $J$  = 7.1 Hz), 1.62–1.74 (1H, m), 1.77–1.88 (1H, m), 2.13 (3H, s), 2.47–2.67 (4H, m), 2.82 (1H, ddd,  $J$  = 10.3, 5.6, 1.7 Hz), 3.34 (1H, td,  $J$  = 7.4, 1.7 Hz), 4.11 (2H, q,  $J$  = 7.1 Hz), 7.03 (1H, d,  $J$  = 8.1 Hz), 7.11 (1H, td,  $J$  = 7.4, 1.0 Hz), 7.22–7.31 (2H, m); <sup>13</sup>C NMR (100 MHz, CDCl<sub>3</sub>)  $\delta$  14.1, 24.1, 300.1, 37.9, 40.0, 40.3, 44.4, 60.9, 116.8, 123.1, 124.9, 129.0, 129.1, 150.3, 169.3, 170.7, 207.0; MS (ESI-TOF)  $m/z$  327 [M+Na]<sup>+</sup>; HRMS calcd for C<sub>17</sub>H<sub>20</sub>NaO<sub>5</sub> [M+Na]<sup>+</sup>, 327.1208; found, 327.1203. Anal. Calcd for C<sub>17</sub>H<sub>20</sub>O<sub>5</sub>: C, 67.09; H, 6.62. Found: C, 66.86; H, 6.68.

##### Ethyl 2-((3*S*\*,4*S*\*)-2-oxo-3-(3-oxo-3-phenylpropyl)chroman-4-yl)acetate (**12a**)

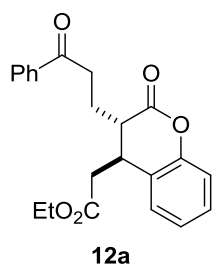

To a solution of 2*H*-chromen-2-one **3a** (72.9 mg, 0.499 mmol) and triple carbon acid **1a** (5.0 mg, 5.0  $\mu$ mol) in CH<sub>2</sub>Cl<sub>2</sub> (1.0 mL), a solution of *tert*-butyl((1-ethoxyvinyl)oxy)dimethylsilane **4** (125 mg, 0.618 mmol) in CH<sub>2</sub>Cl<sub>2</sub> (0.5 mL) was added at  $-78^{\circ}\text{C}$ . After being stirred for 30 min, a solution of phenyl vinyl ketone<sup>7</sup> (101 mg, 0.764 mmol) in CH<sub>2</sub>Cl<sub>2</sub> (0.5 mL) was added to the reaction mixture and it was additionally stirred for 30 min at the same temperature. Then, the reaction mixture was treated with TfOH (0.1 mL) for 30 min at  $-78^{\circ}\text{C}$ . The resulting mixture was quenched with a saturated NaHCO<sub>3</sub> aqueous solution (15 mL), extracted with Et<sub>2</sub>O (20 mL x 3), and washing with brine (20 mL). The combined organic layer was dried over anhydrous MgSO<sub>4</sub>

and concentrated under reduced pressure. Thus obtained residue was purified by column chromatography on silica gel (hexane/EtOAc = 3 : 1) to give the adduct in 83% yield (152 mg, 0.415 mmol). Relative configuration of this compound was assigned by its NOESY spectrum. Colorless crystals (from CH<sub>2</sub>Cl<sub>2</sub>); Mp. 62.0-63.0 °C; IR (ATR)  $\nu$  2947, 1767, 1734, 1719, 1682, 1221, 1209, 1173, 1133, 764, 687 cm<sup>-1</sup>; <sup>1</sup>H NMR (400 MHz, CDCl<sub>3</sub>)  $\delta$  1.22 (3H, t,  $J$  = 7.2 Hz), 1.92-1.97 (1H, m), 1.98-2.04 (1H, m), 2.54 (1H, dd,  $J$  = 16.2, 7.5 Hz), 2.61 (1H, dd,  $J$  = 16.2, 7.7 Hz), 2.95 (1H, ddd,  $J$  = 10.2, 5.5, 1.7 Hz), 3.06 (1H, ddd,  $J$  = 18.1, 8.6, 5.6 Hz), 3.19 (1H, ddd,  $J$  = 18.1, 8.3, 6.8 Hz), 3.43 (1H, td,  $J$  = 7.4, 1.7 Hz), 4.13 (2H, q,  $J$  = 7.2 Hz), 7.06 (1H, d,  $J$  = 7.2 Hz), 7.09-7.15 (1H, m), 7.24-7.32 (2H, m), 7.41-7.48 (2H, m), 7.52-7.59 (1H, m), 7.89-7.96 (2H, d,  $J$  = 8.4 Hz); <sup>13</sup>C NMR (100 MHz, CDCl<sub>3</sub>)  $\delta$  14.1, 24.6, 35.6, 38.0, 40.0, 44.6, 61.0, 116.9, 123.2, 124.9, 128.0, 128.6, 129.0, 129.1, 133.4, 136.6, 150.4, 169.4, 170.7, 198.4; MS (ESI-TOF)  $m/z$  389 [M+Na]<sup>+</sup>; HRMS calcd for C<sub>22</sub>H<sub>22</sub>NaO<sub>5</sub> [M+Na]<sup>+</sup>, 389.1365; found, 389.1360. Anal. Calcd for C<sub>22</sub>H<sub>22</sub>O<sub>5</sub>: C, 72.12; H, 6.05. Found: C, 72.22; H, 6.23.

**Ethyl 2-((3*R*\*,4*S*\*)-3-(2-methyl-4-oxopentan-2-yl)-2-oxochroman-4-yl)acetate (**13a**)**

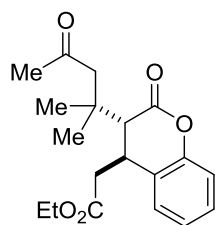

**13a**

According to the synthetic procedure for **11a**, the reaction of 2*H*-chromen-2-one **3a** (73.4 mg, 0.502 mmol), *tert*-butyl((1-ethoxyvinyl)oxy)dimethylsilane **4** (121 mg, 0.598 mmol), and mesityl oxide (73.7 mg, 0.751 mmol) in the presence of triple carbon acid **1a** (5.0 mg, 5.0  $\mu$ mol) in CH<sub>2</sub>Cl<sub>2</sub> (2.0 mL) was carried out at -78 °C for 30 min. Then, the mixture was treated with 10% hydrochloric acid (5.0 mL) for 30 min at room temperature and quenched with a saturated NaHCO<sub>3</sub> aqueous solution (15 mL). After usual extractive workup, column chromatography of the resulting mixture on silica gel (hexane/EtOAc = 4 : 1) gave this product (102 mg, 0.305 mmol, 61% yield) and 1,2-adduct (21.2 mg, 63.3  $\mu$ mol, 13% yield). Relative configuration of **13a** was assigned by its NOESY spectrum. Yellow crystals (from CH<sub>2</sub>Cl<sub>2</sub>); Mp. 52.0-53.0 °C; IR (ATR)  $\nu$  2973, 2930, 1756, 1729, 1718, 1145, 1028, 733 cm<sup>-1</sup>; <sup>1</sup>H NMR (400 MHz, CDCl<sub>3</sub>)  $\delta$  0.76 (3H, s), 1.09 (3H, s), 1.21 (3H, t,  $J$  = 7.2 Hz), 2.10 (3H, s), 2.31 (1H, d,  $J$  = 17.5 Hz), 2.50 (1H, dd,  $J$  = 15.9, 7.4 Hz), 2.57 (1H, dd,  $J$  = 15.9, 7.4 Hz), 2.61 (1H, d,  $J$  = 17.5 Hz), 3.22 (1H, brs), 3.57 (1H, t,  $J$  = 7.4 Hz), 4.05-4.18 (2H, m), 6.98 (1H, dd,  $J$  = 7.2, 0.9 Hz), 7.09 (1H, td,  $J$  = 7.4, 0.9 Hz), 7.20-7.28 (2H, m); <sup>13</sup>C NMR (100 MHz, CDCl<sub>3</sub>)  $\delta$  14.1, 25.6, 26.3, 31.7, 33.7, 36.5, 42.0, 51.0, 52.7, 60.9, 116.6, 124.5, 124.9, 128.1, 128.8, 151.0, 168.5, 170.7, 207.2; MS (ESI-TOF)  $m/z$  335 [M+Na]<sup>+</sup>; HRMS calcd for C<sub>19</sub>H<sub>24</sub>NaO<sub>5</sub> [M+Na]<sup>+</sup>, 335.1521; found, 335.1520. Anal. Calcd for C<sub>19</sub>H<sub>24</sub>O<sub>5</sub>: C, 68.66; H, 7.28. Found: C, 68.41; H, 7.30.

**Ethyl 2-((3*S*\*,4*S*\*)-6-bromo-2-oxo-3-(3-oxo-3-phenylpropyl)chroman-4-yl)acetate (**12b**)**

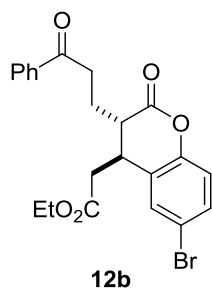

To a solution of 6-bromo-2*H*-chromen-2-one<sup>4</sup> **3b** (113 mg, 0.502 mmol) and triple carbon acid **1a** (5.2 mg, 5.2  $\mu$ mol) in CH<sub>2</sub>Cl<sub>2</sub> (9.0 mL), a solution of *tert*-butyl((1-ethoxyvinyl)oxy)dimethylsilane **4** (122 mg, 0.603 mmol) in CH<sub>2</sub>Cl<sub>2</sub> (0.5 mL) was added at  $-78$  °C. After being stirred for 30 min, a solution of phenyl vinyl ketone<sup>7</sup> (102 mg, 0.772 mmol) in CH<sub>2</sub>Cl<sub>2</sub> (0.5 mL) was added to the reaction mixture and it was additionally stirred for 30 min at the same temperature. Then, the reaction mixture was treated with TfOH (0.1 mL) for 1 h at  $-78$  °C. The resulting mixture was quenched with a saturated NaHCO<sub>3</sub> aqueous solution (15 mL), extracted with Et<sub>2</sub>O (20 mL x 3), and washing with brine (20 mL). The combined organic layer was dried over anhydrous MgSO<sub>4</sub> and concentrated under reduced pressure. Thus obtained residue was purified by column chromatography on silica gel (hexane/EtOAc = 5 : 1) to give the adduct in 83% yield (186 mg, 0.418 mmol). Relative configuration of this compound was assigned by its NOESY spectrum. Colorless oil; IR (neat)  $\nu$  2980, 2930, 1765, 1730, 1690, 1480, 1220, 1180, 820, 750, 735, 690 cm<sup>-1</sup>; <sup>1</sup>H NMR (400 MHz, CDCl<sub>3</sub>)  $\delta$  1.23 (3H, t, *J* = 7.1 Hz), 1.81-1.93 (1H, m), 1.96-2.07 (1H, m), 2.53 (1H, dd, *J* = 16.3, 7.6 Hz), 2.61 (1H, dd, *J* = 16.3, 7.2 Hz), 2.94 (1H, ddd, *J* = 10.2, 5.5, 1.7 Hz), 3.06 (1H, ddd, *J* = 18.2, 7.7, 6.6 Hz), 3.17 (1H, dt, *J* = 18.2, 7.2 Hz), 3.36-3.43 (1H, m), 4.14 (2H, q, *J* = 7.1 Hz), 6.94 (1H, d, *J* = 8.4 Hz), 7.38-7.48 (4H, m), 7.56 (1H, t, *J* = 7.7 Hz), 7.92 (2H, d, *J* = 8.4 Hz); <sup>13</sup>C NMR (100 MHz, CDCl<sub>3</sub>)  $\delta$  14.1, 24.6, 35.4, 37.9, 39.8, 44.3, 61.1, 117.4, 118.6, 125.4, 128.0, 128.6, 131.9, 132.0, 133.3, 136.5, 149.5, 168.6, 170.4, 198.2; MS (ESI-TOF) *m/z* 467 [M+H]<sup>+</sup>, 469 [M+2+H]<sup>+</sup>; HRMS calcd for C<sub>22</sub>H<sub>21</sub>BrNaO<sub>5</sub> [M+Na]<sup>+</sup>, 467.0470; found, 467.0469. Anal. Calcd for C<sub>22</sub>H<sub>21</sub>BrO<sub>5</sub>: C, 59.34; H, 4.75. Found: C, 59.53; H, 4.86.

**Ethyl 2-((3*S*\*,4*S*\*)-7-bromo-2-oxo-3-(3-oxo-3-phenylpropyl)chroman-4-yl)acetate (**12c**)**

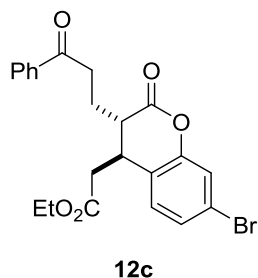

According to the synthetic procedure for **12b**, this compound was obtained in 73% yield (162 mg, 0.365 mmol) by the reaction of 7-bromo-2*H*-chromen-2-one<sup>4</sup> **3c** (113 mg, 0.502 mmol), *tert*-butyl((1-ethoxyvinyl)oxy)dimethylsilane **4** (124 mg, 0.613 mmol), and phenyl vinyl ketone<sup>7</sup> (102 mg, 0.772 mmol) in the presence of triple carbon acid **1a** (5.0 mg, 5.0  $\mu$ mol) in CH<sub>2</sub>Cl<sub>2</sub> (10 mL) for 30 min at  $-78$  °C and the following desilylation with TfOH (0.1 mL). Its isolation was achieved by column chromatography on silica gel (hexane/EtOAc = 3 : 1). Relative configuration of this compound was assigned by

its NOESY spectrum. Pale yellow oil; IR (neat)  $\nu$  2980, 2930, 1771, 1730, 1680, 1600, 1481, 1408, 1212, 1179, 1075, 690  $\text{cm}^{-1}$ ;  $^1\text{H}$  NMR (400 MHz,  $\text{CDCl}_3$ )  $\delta$  1.22 (3H, t,  $J = 7.1$  Hz), 1.81-1.92 (1H, m), 1.97-2.08 (1H, m), 2.52 (1H, dd,  $J = 16.3, 7.7$  Hz), 2.60 (1H, dd,  $J = 16.3, 7.1$  Hz), 2.94 (1H, ddd,  $J = 10.2, 5.4, 1.4$  Hz), 3.05 (1H, ddd,  $J = 18.2, 8.0, 5.9$  Hz), 3.17 (1H, dt,  $J = 18.2, 7.5$  Hz), 3.37-3.43 (1H, m), 4.08-4.17 (2H, m), 7.16 (1H, d,  $J = 8.0$  Hz), 7.22-7.28 (2H, m), 7.45 (2H, t,  $J = 7.5$  Hz), 7.56 (1H, t,  $J = 7.0$  Hz), 7.92 (2H, d,  $J = 7.7$  Hz);  $^{13}\text{C}$  NMR (100 MHz,  $\text{CDCl}_3$ )  $\delta$  14.1, 24.6, 35.4, 37.7, 39.8, 44.4, 61.0, 120.2, 121.9, 122.3, 128.0, 128.6, 130.4, 133.3, 136.5, 151.0, 168.5, 170.5, 198.2; MS (ESI-TOF)  $m/z$  467  $[\text{M}+\text{Na}]^+$ , 469  $[\text{M}+2+\text{Na}]^+$ ; HRMS calcd for  $\text{C}_{22}\text{H}_{21}\text{BrNaO}_5$   $[\text{M}+\text{Na}]^+$ , 467.0470; found, 467.0471. Anal. Calcd for  $\text{C}_{22}\text{H}_{21}\text{BrO}_5$ : C, 59.34; H, 4.75. Found: C, 59.24; H, 4.77.

**Ethyl 2-((3*S*\*,4*S*\*)-6-methyl-2-oxo-3-(3-oxo-3-phenylpropyl)chroman-4-yl)acetate (**12d**)**

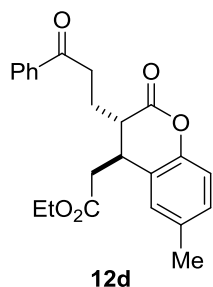

According to the synthetic procedure for **12a**, this compound was obtained in 79% yield (151 mg, 0.397 mmol) by the reaction of 6-methyl-2*H*-chromen-2-one **3d** (80.1 mg, 0.500 mmol), *tert*-butyl((1-ethoxyvinyl)oxy)dimethylsilane **4** (124 mg, 0.613 mmol), and phenyl vinyl ketone<sup>7</sup> (101 mg, 0.764 mmol) in the presence of triple carbon acid **1a** (5.0 mg, 5.0  $\mu\text{mol}$ ) in  $\text{CH}_2\text{Cl}_2$  (4.0 mL) at  $-78$   $^\circ\text{C}$  for 30 min and the following desilylation with TFOH (0.1 mL). Its isolation was achieved by column chromatography on silica gel (hexane/EtOAc = 5 : 1). Relative configuration of this compound was assigned by its NOESY spectrum. Colorless oil; IR (neat)  $\nu$  2980, 2920, 1760, 1730, 1680, 1494, 1203, 686  $\text{cm}^{-1}$ ;  $^1\text{H}$  NMR (400 MHz,  $\text{CDCl}_3$ )  $\delta$  1.22 (3H, t,  $J = 7.1$  Hz), 1.82-1.93 (1H, m), 1.95-2.06 (1H, m), 2.31 (3H, s), 2.53 (1H, dd,  $J = 16.2, 7.3$  Hz), 2.58 (1H, dd,  $J = 16.2, 7.6$  Hz), 2.92 (1H, ddd,  $J = 10.0, 5.5, 1.5$  Hz), 3.05 (1H, ddd,  $J = 18.0, 8.6, 5.6$  Hz), 3.17 (1H, ddd,  $J = 18.0, 8.6, 6.8$  Hz), 3.33-3.40 (1H, m), 4.13 (2H, q,  $J = 7.1$  Hz), 6.93 (1H, d,  $J = 8.0$  Hz), 7.05 (1H, s), 7.07 (1H, d,  $J = 8.0$  Hz), 7.40-7.48 (2H, m), 7.55 (1H, tt,  $J = 7.3, 1.2$  Hz), 7.90-7.94 (2H, m);  $^{13}\text{C}$  NMR (100 MHz,  $\text{CDCl}_3$ )  $\delta$  14.1, 20.7, 24.6, 35.6, 38.0, 40.0, 44.6, 60.5, 116.5, 122.8, 128.0, 128.6, 129.42, 129.44, 133.2, 134.5, 136.5, 148.3, 169.6, 170.8, 198.4; MS (ESI-TOF)  $m/z$  403  $[\text{M}+\text{Na}]^+$ ; HRMS calcd for  $\text{C}_{23}\text{H}_{24}\text{NaO}_5$   $[\text{M}+\text{Na}]^+$ , 403.1521; found, 403.1520.

**Ethyl 2-((3*S*\*,4*S*\*)-6-nitro-2-oxo-3-(3-oxo-3-phenylpropyl)chroman-4-yl)acetate (**12e**)**

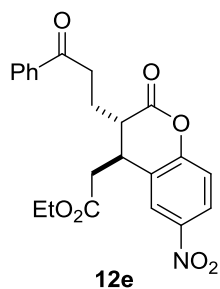

According to the synthetic procedure for **12b**, this compound was obtained in 77% yield (157 mg, 0.382 mmol) by the reaction of 6-nitro-2*H*-chromen-2-one<sup>5</sup> **3e** (95.3 mg, 0.499 mmol), *tert*-butyl((1-ethoxyvinyl)oxy)dimethylsilane **4** (153 mg, 0.756 mmol), and phenyl vinyl ketone<sup>7</sup> (106 mg, 0.802 mmol) in the presence of triple carbon acid **1a** (15 mg, 15  $\mu$ mol) in CH<sub>2</sub>Cl<sub>2</sub> (10 mL) at -78 °C for 30 min and the following desilylation with TfOH (0.1 mL). Its isolation was achieved by column chromatography on silica gel (hexane/EtOAc = 5 : 1). Relative configuration of this compound was assigned by its NOESY spectrum. Colorless oil; IR (neat)  $\nu$  2975, 2925, 1779, 1748, 1682, 1525, 1341, 1230, 1091, 751, 693 cm<sup>-1</sup>; <sup>1</sup>H NMR (400 MHz, CDCl<sub>3</sub>)  $\delta$  1.24 (3H, t, *J* = 7.1 Hz), 1.83-1.96 (1H, m), 2.00-2.12 (1H, m), 2.59 (1H, dd, *J* = 16.6, 7.5 Hz), 2.69 (1H, dd, *J* = 16.6, 6.9 Hz), 3.03 (1H, ddd, *J* = 10.2, 5.4, 2.0 Hz), 3.09 (1H, ddd, *J* = 18.2, 7.5, 6.0 Hz), 3.19 (1H, dt, *J* = 18.2, 7.3 Hz), 3.52-3.58 (1H, m), 4.15 (2H, q, *J* = 7.1 Hz), 7.20 (1H, d, *J* = 8.0 Hz), 7.43-7.49 (2H, m), 7.57 (1H, t, *J* = 7.3 Hz), 7.90-7.94 (2H, m), 8.21 (1H, dd, *J* = 8.0, 2.6 Hz), 8.25 (1H, d, *J* = 2.6 Hz); <sup>13</sup>C NMR (100 MHz, CDCl<sub>3</sub>)  $\delta$  14.1, 24.6, 35.2, 37.9, 43.9, 61.3, 117.8, 124.5, 125.0, 125.2, 128.0, 128.7, 133.4, 136.4, 144.4, 155.0, 167.5, 170.0, 198.0; MS (ESI-TOF) *m/z* 434 [M+Na]<sup>+</sup>; HRMS calcd for C<sub>22</sub>H<sub>21</sub>NaNO<sub>6</sub> [M+Na]<sup>+</sup>, 434.1216; found, 434.1213. Anal. Calcd for C<sub>22</sub>H<sub>21</sub>NO<sub>6</sub>: C, 64.23; H, 5.15; N, 3.40. Found: C, 64.22; H, 5.16; N, 3.36.

**Ethyl 2-((3*S*\*,4*S*\*)-5-iodo-2-oxo-3-(3-oxo-3-phenylpropyl)-6-phenyl-3,4-dihydro-2*H*-pyran-4-yl)acetate (**12f**)**

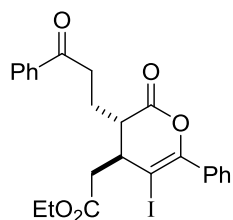

**12f**

According to the synthetic procedure for **12a**, this compound was obtained in 84% yield (218 mg, 0.421 mmol) by the reaction of 5-iodo-6-phenyl-2*H*-pyran-2-one<sup>3</sup> **3f** (149 mg, 0.500 mmol), *tert*-butyl((1-ethoxyvinyl)oxy)dimethylsilane **4** (125 mg, 0.618 mmol), and phenyl vinyl ketone<sup>7</sup> (102 mg, 0.772 mmol) in the presence of triple carbon acid **1a** (5.1 mg, 5.1  $\mu$ mol) in CH<sub>2</sub>Cl<sub>2</sub> (3.0 mL) at -78 °C for 30 min and the following desilylation with TfOH (0.1 mL). Its isolation was achieved by column chromatography on silica gel (hexane/EtOAc = 4 : 1). Relative configuration of this compound was assigned by its NOESY spectrum. Colorless oil; IR (neat)  $\nu$  3050, 2970, 2920, 1760, 1730, 1680, 1600, 1580, 1495, 1450, 1370, 1230, 1180, 1105, 1000, 960, 760, 695 cm<sup>-1</sup>; <sup>1</sup>H NMR (400 MHz, CDCl<sub>3</sub>)  $\delta$  1.29 (3H, t, *J* = 7.2 Hz), 2.21-2.32 (1H, m), 2.32-2.41 (1H, m), 2.56 (1H, dd, *J* = 16.7, 9.8 Hz), 2.79 (1H, dd, *J* = 16.7, 3.7 Hz), 2.92 (1H, ddd, *J* = 9.8, 6.0, 1.2 Hz), 3.09-3.27 (3H, m), 4.19 (2H, q, *J* = 7.2 Hz), 7.38-7.42 (3H, m), 7.46 (2H, t, *J* = 7.4 Hz), 7.54-7.61 (3H, m), 7.97 (2H, brd, *J* = 7.1 Hz); <sup>13</sup>C NMR (100 MHz, CDCl<sub>3</sub>)  $\delta$  15.2, 26.3, 36.6, 37.4, 45.7, 48.6, 62.2, 74.5, 129.0, 129.1, 129.6, 130.3, 134.2, 129.44, 133.2, 134.3, 135.1, 150.9, 169.5, 171.4, 199.3; MS (ESI-TOF) *m/z* 541 [M+Na]<sup>+</sup>; HRMS calcd for C<sub>24</sub>H<sub>23</sub>IO<sub>5</sub> [M+Na]<sup>+</sup>, 541.0488; found, 541.0485. Anal. Calcd for C<sub>24</sub>H<sub>23</sub>IO<sub>5</sub>: C, 55.61; H, 4.47. Found: C, 55.45; H, 4.65.

**Ethyl 2-((3S\*,4S\*)-2-oxo-3-(3-oxo-3-phenylpropyl)-6-phenyl-5-(phenylethynyl)-3,4-dihydro-2H-pyran-4-yl)acetate (12g)**

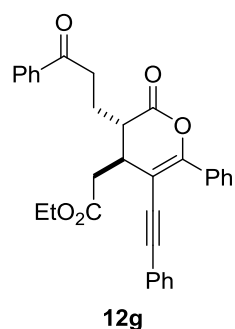

According to the synthetic procedure for **12a**, this compound was obtained in 72% yield (177 mg, 0.359 mmol) by the reaction of 6-phenyl-5-(phenylethynyl)-2H-pyran-2-one<sup>6</sup> **3g** (136 mg, 0.499 mmol), *tert*-butyl((1-ethoxyvinyl)oxy)dimethylsilane **4** (155 mg, 0.766 mmol), and phenyl vinyl ketone<sup>7</sup> (119 mg, 0.902 mmol) in the presence of triple carbon acid **1a** (10 mg, 10  $\mu$ mol) in CH<sub>2</sub>Cl<sub>2</sub> (5.0 mL) at -78 °C for 30 min and the following desilylation with TfoH (0.1 mL). Its isolation was achieved by column chromatography on silica gel (hexane/EtOAc = 5 : 1). Relative configuration of this compound was assigned by its NOESY spectrum. Pale yellow oil; IR (neat)  $\nu$  3153, 2991, 2938, 1964, 1892, 1769, 1730, 1681, 1597, 1487, 1443, 1374, 1260, 1229, 1180, 1099, 1000, 759, 691 cm<sup>-1</sup>; <sup>1</sup>H NMR (400 MHz, CDCl<sub>3</sub>)  $\delta$  1.26 (3H, t, *J* = 7.1 Hz), 2.25 (2H, q, *J* = 7.5 Hz), 2.63 (1H, dd, *J* = 16.6, 9.0 Hz), 2.83 (1H, dd, *J* = 16.6, 4.8 Hz), 2.95 (1H, td, *J* = 7.5, 2.6 Hz), 3.10-3.20 (2H, m), 3.25 (1H, dt, *J* = 18.0, 7.5 Hz), 4.17 (2H, q, *J* = 7.1 Hz), 7.31-7.36 (3H, m), 7.38-7.48 (7H, m), 7.53-7.59 (1H, m), 7.94-7.99 (2H, m), 8.02-8.07 (2H, m); <sup>13</sup>C NMR (100 MHz, CDCl<sub>3</sub>)  $\delta$  14.1, 24.8, 35.6, 37.2, 40.0, 42.9, 61.1, 86.3, 95.8, 99.2, 122.9, 127.7, 128.0, 128.4, 128.5, 128.6, 129.9, 131.1, 131.9, 133.2, 136.6, 153.0, 168.6, 171.0, 198.4; MS (ESI-TOF) *m/z* 493 [M+H]<sup>+</sup>; HRMS calcd for C<sub>32</sub>H<sub>29</sub>O<sub>5</sub> [M+H]<sup>+</sup>, 493.2015; found, 493.2018.

**Ethyl 2-((3S\*,4S\*)-2-oxo-3-((R\*)-3-oxocyclopentyl)chroman-4-yl)acetate (3,3'-syn-14a) and ethyl 2-((3S\*,4S\*)-2-oxo-3-((S\*)-3-oxocyclopentyl)chroman-4-yl)acetate (3,3'-anti-14a)**

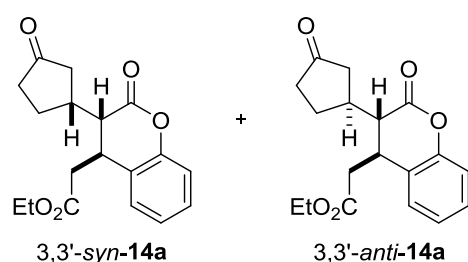

According to the synthetic procedure for **12a**, the reaction of 2H-chromen-2-one **3a** (146 mg, 0.999 mmol), *tert*-butyl((1-ethoxyvinyl)oxy)dimethylsilane **4** (251 mg, 1.24 mmol), and cyclopent-2-en-1-one (124 mg, 1.51 mmol) in the presence of triple carbon acid **1a** (10 mg, 10  $\mu$ mol) in CH<sub>2</sub>Cl<sub>2</sub> (4.0 mL) was conducted. After being stirred for 30 min at -78 °C, this mixture was treated with 2% hydrochloric acid (5.0 mL) for 30 min at room temperature. Then, the mixture was quenched with a saturated NaHCO<sub>3</sub> aqueous solution (10 mL) and extracted with Et<sub>2</sub>O (15 mL x 3). The combined organic layer was washed with a saturated NaHCO<sub>3</sub> aqueous solution (10 mL) and brine (10 mL), dried over anhydrous MgSO<sub>4</sub>, and evaporated. Column chromatography on

silica gel (hexane/EtOAc = 2 : 1) of the resulting residue gave a mixture of two diastereomers in 84% yield (267 mg, 0.844 mmol, 3,3'-*syn/anti* = 1 : 2.9) by. Separation of the diastereomers was achieved by recycling HPLC technique (hexane/EtOAc = 2 : 1) to give less polar isomer 3,3'-*syn*-**14a** and more polar one 3,3'-*anti*-**14a** in 21% (67 mg, 0.212 mmol) and 59% (188 mg, 0.595 mmol) yields, respectively. Structure of 3,3'-*syn*-**14a** was confirmed by an X-ray crystallographic analysis. 3,4-*Anti* configuration of 3,3'-*anti*-**14a** was assigned by its NOESY spectrum.

For 3,3'-*syn*-**14a** Colorless crystals (from EtOAc/hexane); Mp. 89.0-90.5 °C; IR (ATR)  $\nu$  2964, 1753, 1735, 1458, 1134, 910, 850, 760  $\text{cm}^{-1}$ ;  $^1\text{H}$  NMR (400 MHz,  $\text{CDCl}_3$ )  $\delta$  1.23 (3H, t,  $J$  = 7.2 Hz), 1.75-1.89 (1H, m), 1.97-2.21 (4H, m), 2.29-2.46 (2H, m), 2.56 (2H, d,  $J$  = 7.3 Hz), 2.79 (1H, dd,  $J$  = 10.1, 1.4 Hz), 3.35-3.42 (1H, m), 4.13 (2H, q,  $J$  = 7.2 Hz), 7.07 (1H, dd,  $J$  = 8.1, 1.0 Hz), 7.14 (1H, td,  $J$  = 7.6, 1.0 Hz), 7.24 (1H, dd,  $J$  = 7.6, 1.7 Hz), 7.29-7.35 (1H, m);  $^{13}\text{C}$  NMR (100 MHz,  $\text{CDCl}_3$ )  $\delta$  14.1, 27.9, 36.4, 36.8, 37.4, 39.8, 43.0, 50.6, 61.1, 116.9, 122.9, 125.2, 128.9, 129.2, 150.6, 167.8, 170.6, 216.0; MS (ESI-TOF)  $m/z$  339  $[\text{M}+\text{Na}]^+$ ; HRMS calcd for  $\text{C}_{18}\text{H}_{20}\text{NaO}_5$   $[\text{M}+\text{Na}]^+$ , 339.1208; found, 339.1211. Anal. Calcd for  $\text{C}_{18}\text{H}_{20}\text{O}_5$ : C, 68.34; H, 6.37. Found: C, 68.13; H, 6.34.

For 3,3'-*anti*-**14a** Colorless crystals (from EtOAc/hexane); Mp. 40.0-42.5 °C; IR (ATR)  $\nu$  2957, 1765, 1738, 1725, 1457, 1215, 1160, 855, 759  $\text{cm}^{-1}$ ;  $^1\text{H}$  NMR (400 MHz,  $\text{CDCl}_3$ )  $\delta$  1.21 (3H, t,  $J$  = 7.1 Hz), 1.63-1.76 (1H, m), 1.98-2.38 (6H, m), 2.56 (2H, d,  $J$  = 7.5 Hz), 2.79 (1H, d,  $J$  = 9.0 Hz), 3.55 (1H, t,  $J$  = 7.5 Hz), 4.12 (2H, q,  $J$  = 7.1 Hz), 7.03 (1H, d,  $J$  = 8.1 Hz), 7.13 (1H, t,  $J$  = 7.3 Hz), 7.24-7.33 (2H, m);  $^{13}\text{C}$  NMR (100 MHz,  $\text{CDCl}_3$ )  $\delta$  14.1, 27.6, 35.4, 36.2, 38.1, 39.8, 43.1, 50.4, 61.0, 116.9, 122.9, 125.1, 128.9, 129.2, 150.5, 168.2, 170.7, 216.2; MS (ESI-TOF)  $m/z$  339  $[\text{M}+\text{Na}]^+$ ; HRMS calcd for  $\text{C}_{18}\text{H}_{20}\text{NaO}_5$   $[\text{M}+\text{Na}]^+$ , 339.1208; found, 339.1209. Anal. Calcd for  $\text{C}_{18}\text{H}_{20}\text{O}_5$ : C, 68.34; H, 6.37. Found: C, 68.16; H, 6.37.

**Ethyl 2-((3*S*\*,4*S*\*)-6-bromo-2-oxo-3-((*R*\*)-3-oxocyclopentyl)chroman-4-yl)acetate (3,3'-*syn*-**14b**) and Ethyl 2-((3*S*\*,4*S*\*)-6-bromo-2-oxo-3-((*S*\*)-3-oxocyclopentyl)chroman-4-yl)acetate (3,3'-*anti*-**14b**)**

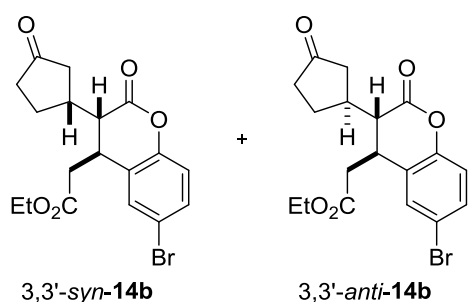

According to the synthetic procedure for **12b**, the reaction of 6-bromo-2*H*-chromen-2-one<sup>4</sup> **3b** (113 mg, 0.502 mmol), *tert*-butyl((1-ethoxyvinyl)oxy)dimethylsilane **4** (123 mg, 0.608 mmol), and cyclopent-2-en-1-one (62 mg, 0.755 mmol) in the presence of triple carbon acid **1a** (5.0 mg, 5.0  $\mu\text{mol}$ ) in  $\text{CH}_2\text{Cl}_2$  (10 mL) was conducted. After being stirred for 30 min at  $-78^\circ\text{C}$ , this reaction mixture was treated with 2% hydrochloric acid (5.0 mL) for 30 min at room temperature. Then, the mixture was diluted with  $\text{H}_2\text{O}$  (10 mL) and extracted with  $\text{Et}_2\text{O}$  (20 mL x 3). The combined organic layer was washed with saturated  $\text{NaHCO}_3$  aqueous solution (15 mL) and brine (15 mL), dried over anhydrous  $\text{MgSO}_4$ , and evaporated. A mixture of two diastereomers was obtained in 72% yield (143 mg, 0.362 mmol, 3,3'-*syn/anti* = 1 : 2.4) by column chromatography on silica gel (hexane/EtOAc =

3 : 1) of the resulting residue. Separation of the diastereomers was achieved by recycling HPLC technique (hexane/EtOAc = 1.5 : 1) to give less polar isomer 3,3'-*syn*-**14b** and more polar one 3,3'-*anti*-**14b** in 18% (35.9 mg, 90.8  $\mu$ mol) and 42% (83.8 mg, 0.212 mmol) yields, respectively. Structure of 3,3'-*syn*-**14b** was confirmed by an X-ray crystallographic analysis. 3,4-*Anti* configuration of 3,3'-*anti*-**14b** was assigned by its NOESY spectrum.

For 3,3'-*syn*-**14b** Colorless crystals (from EtOAc/hexane); Mp. 94.0-95.5 °C. IR (ATR)  $\nu$  2948, 1765, 1735, 1720, 1478, 1160, 1138, 824, 486  $\text{cm}^{-1}$ ;  $^1\text{H}$  NMR (400 MHz,  $\text{CDCl}_3$ )  $\delta$  1.23 (3H, t,  $J$  = 7.1 Hz), 1.73-1.87 (1H, m), 1.96-2.20 (4H, m), 2.29-2.48 (2H, m), 2.55 (2H, d,  $J$  = 7.5 Hz), 2.77 (1H, d,  $J$  = 10.2 Hz), 3.35 (1H, t,  $J$  = 7.5 Hz), 4.14 (2H, q,  $J$  = 7.1 Hz), 6.95 (1H, d,  $J$  = 8.5 Hz), 7.37-7.45 (2H, m);  $^{13}\text{C}$  NMR (100 MHz,  $\text{CDCl}_3$ )  $\delta$  14.1, 27.9, 36.4, 36.6, 38.4, 39.6, 42.9, 50.2, 61.2, 117.6, 118.7, 125.0, 131.6, 132.2, 149.6, 167.0, 170.2, 215.6; MS (ESI-TOF)  $m/z$  417  $[\text{M}+\text{Na}]^+$ , 419  $[\text{M}+2+\text{Na}]^+$ ; HRMS calcd for  $\text{C}_{18}\text{H}_{19}\text{BrNaO}_5$   $[\text{M}+\text{Na}]^+$ , 417.0314; found, 417.0310. Anal. Calcd for  $\text{C}_{18}\text{H}_{19}\text{BrO}_5$ : C, 54.70; H, 4.85. Found: C, 54.75; H, 4.86.

For 3,3'-*anti*-**14b** Colorless oil; IR (neat)  $\nu$  2991, 1778, 1741, 1731, 1480, 1220, 1169, 821, 757  $\text{cm}^{-1}$ ;  $^1\text{H}$  NMR (400 MHz,  $\text{CDCl}_3$ )  $\delta$  1.24 (3H, t,  $J$  = 7.1 Hz), 1.60-1.76 (1H, m), 2.05-2.19 (3H, m), 2.19-2.31 (2H, m), 2.36 (1H, dd,  $J$  = 18.1, 7.1 Hz), 2.56 (2H, d,  $J$  = 7.5 Hz), 2.76 (1H, d,  $J$  = 10.2 Hz), 3.53 (1H, t,  $J$  = 7.5 Hz), 4.07-4.20 (2H, m), 6.92-6.97 (1H, m), 7.39-7.45 (2H, m);  $^{13}\text{C}$  NMR (100 MHz,  $\text{CDCl}_3$ )  $\delta$  14.1, 27.7, 35.3, 36.1, 38.0, 39.5, 43.0, 50.0, 61.2, 117.5, 118.2, 125.0, 131.6, 132.3, 149.6, 167.4, 170.3, 215.8; MS (ESI-TOF)  $m/z$  417  $[\text{M}+\text{Na}]^+$ , 419  $[\text{M}+2+\text{Na}]^+$ ; HRMS calcd for  $\text{C}_{18}\text{H}_{19}\text{BrNaO}_5$   $[\text{M}+\text{Na}]^+$ , 417.0314; found, 417.0318. Anal. Calcd for  $\text{C}_{18}\text{H}_{19}\text{BrO}_5$ : C, 54.70; H, 4.85. Found: C, 54.46; H, 4.80.

**Ethyl 2-((3*S*\*,4*S*\*)-2-oxo-3-((*R*\*)-3-oxocyclohexyl)chroman-4-yl)acetate (3,3'-*syn*-**15a**) and ethyl 2-((3*S*\*,4*S*\*)-2-oxo-3-((*S*\*)-3-oxocyclohexyl)chroman-4-yl)acetate (3,3'-*anti*-**15a**)**

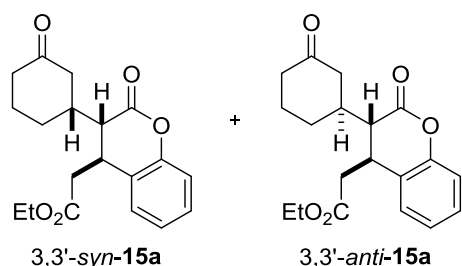

According to the synthetic procedure for **12a**, the reaction of 2*H*-chromen-2-one **3a** (147 mg, 1.01 mmol), *tert*-butyl((1-ethoxyvinyl)oxy)dimethylsilane **4** (243 mg, 1.20 mmol), and cyclohex-2-en-1-one (146 mg, 1.52 mmol) in the presence of triple carbon acid **1a** (10 mg, 10  $\mu$ mol) in  $\text{CH}_2\text{Cl}_2$  (4.0 mL) was conducted. After being stirred for 30 min at  $-78$  °C, this reaction mixture was treated with 2% hydrochloric acid (5.0 mL) for 30 min at room temperature. Then, the mixture was diluted with  $\text{H}_2\text{O}$  (10 mL) and extracted with  $\text{Et}_2\text{O}$  (20 mL x 3). The combined organic layer was washed with saturated  $\text{NaHCO}_3$  aqueous solution (15 mL) and brine (15 mL), dried over anhydrous  $\text{MgSO}_4$ , and evaporated. A mixture of two diastereomers was obtained in 93% yield (308 mg, 0.929 mmol, 3,3'-*syn/anti* = 1.1 : 1) by column chromatography on silica gel (hexane/EtOAc = 1.5 : 1) to give less polar isomer 3,3'-*syn*-**15a** and more polar one 3,3'-*anti*-**15a** in 46% (154 mg, 0.466 mmol)



and 42% (140 mg, 0.424 mmol) yields, respectively. Structure of 3,3'-*syn*-**15a** was confirmed by an X-ray crystallographic analysis. 3,4-*Anti* configuration of 3,3'-*anti*-**15a** was assigned by its NOESY spectrum.

For 3,3'-*syn*-**15a** Colorless crystals (from hexane); Mp. 97.5-99.0 °C; IR (ATR)  $\nu$  2961, 1758, 1732, 1707, 1487, 1223, 1148, 764, 504  $\text{cm}^{-1}$ ;  $^1\text{H}$  NMR (400 MHz,  $\text{CDCl}_3$ )  $\delta$  1.22 (3H, t,  $J = 7.2$  Hz), 1.42-1.62 (2H, m), 1.71-1.89 (2H, m), 2.00-2.16 (2H, m), 2.18-2.29 (1H, m), 2.29-2.38 (1H, m), 2.50-2.58 (1H, m), 2.53 (2H, d,  $J = 7.5$  Hz), 2.73 (1H, dd  $J = 9.3, 1.5$  Hz), 3.47 (1H, td,  $J = 7.5, 1.5$  Hz), 4.13 (2H, q,  $J = 7.2$  Hz), 7.03 (1H, dd,  $J = 8.1, 1.0$  Hz), 7.12 (1H, td,  $J = 7.6, 1.0$  Hz), 7.23 (1H, dd,  $J = 7.6, 1.6$  Hz), 7.26-7.32 (1H, m);  $^{13}\text{C}$  NMR (100 MHz,  $\text{CDCl}_3$ )  $\delta$  14.1, 24.4, 29.5, 34.8, 37.6, 39.8, 41.0, 45.3, 50.9, 61.0, 116.8, 122.9, 125.1, 128.9, 129.2, 150.6, 167.9, 170.5, 209.2; MS (ESI-TOF)  $m/z$  353  $[\text{M}+\text{Na}]^+$ ; HRMS calcd for  $\text{C}_{19}\text{H}_{22}\text{NaO}_5$   $[\text{M}+\text{Na}]^+$ , 353.1365; found, 353.1354. Anal. Calcd for  $\text{C}_{19}\text{H}_{22}\text{O}_5$ : C, 69.07; H, 6.71. Found: C, 69.05; H, 6.70.

For 3,3'-*anti*-**15a** Pale yellow oil; IR (neat)  $\nu$  2945, 1766, 1729, 1711, 1484, 1458, 1223, 1180, 1146, 760  $\text{cm}^{-1}$ ;  $^1\text{H}$  NMR (400 MHz,  $\text{CDCl}_3$ )  $\delta$  1.22 (3H, t,  $J = 7.1$  Hz), 1.47-1.54 (2H, m), 1.72-1.85 (1H, m), 2.01-2.11 (2H, m), 2.17-2.36 (4H, m), 2.55 (2H, d, 7.5 Hz), 2.73 (1H, d,  $J = 9.0$  Hz), 3.56 (1H, t,  $J = 7.5$  Hz), 4.12 (2H, q,  $J = 7.1$  Hz), 7.05 (1H, brd,  $J = 8.1$  Hz), 7.11 (1H, td,  $J = 7.5, 1.0$  Hz), 7.22 (1H, dd,  $J = 7.5, 1.4$  Hz), 7.25-7.32 (1H, m);  $^{13}\text{C}$  NMR (100 MHz,  $\text{CDCl}_3$ )  $\delta$  14.1, 24.5, 29.2, 35.4, 37.9, 39.9, 40.9, 45.8, 50.9, 61.0, 117.0, 123.0, 125.0, 128.7, 129.2, 150.5, 167.7, 170.7, 209.2; MS (ESI-TOF)  $m/z$  353  $[\text{M}+\text{Na}]^+$ ; HRMS calcd for  $\text{C}_{19}\text{H}_{22}\text{NaO}_5$   $[\text{M}+\text{Na}]^+$ , 353.1365; found, 353.1362. Anal. Calcd for  $\text{C}_{19}\text{H}_{22}\text{O}_5$ : C, 69.07; H, 6.71. Found: C, 69.13; H, 6.81.

**Ethyl 2-((3*S*\*,4*S*\*)-6-bromo-2-oxo-3-((*R*\*)-3-oxocyclohexyl)chroman-4-yl)acetate (3,3'-*syn*-**15b**) and ethyl 2-((3*S*\*,4*S*\*)-6-bromo-2-oxo-3-((*S*\*)-3-oxocyclohexyl)chroman-4-yl)acetate (3,3'-*anti*-**15b**)**

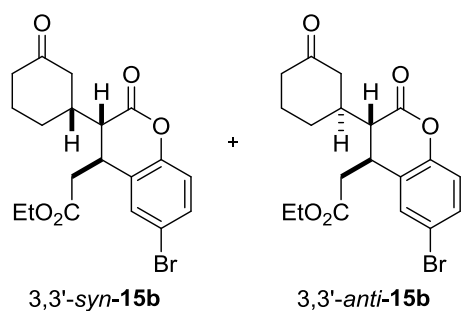

According to the synthetic procedure for **12b**, the reaction of 6-bromo-2*H*-chromen-2-one<sup>4</sup> **3b** (113 mg, 0.502 mmol), *tert*-butyl((1-ethoxyvinyl)oxy)dimethylsilane **4** (125 mg, 0.618 mmol), and cyclohex-2-en-1-one (73 mg, 0.76 mmol) in the presence of triple carbon acid **1a** (5.1 mg, 5.1  $\mu\text{mol}$ ) in  $\text{CH}_2\text{Cl}_2$  (10 mL) was conducted. After being stirred for 30 min at  $-78$  °C, this reaction mixture was treated with 2% hydrochloric acid (5.0 mL) for 30 min at room temperature. Then, the mixture was diluted with  $\text{H}_2\text{O}$  (10 mL) and extracted with  $\text{Et}_2\text{O}$  (20 mL x 3). The combined organic layer was washed with saturated  $\text{NaHCO}_3$  aqueous solution (15 mL) and brine (15 mL), dried over anhydrous  $\text{MgSO}_4$ , and evaporated. A mixture of two diastereomers was obtained in 87% yield (177 mg, 0.432 mmol, 3,3'-*syn/anti* = 1.1 : 1) by column chromatography on silica gel (hexane/ $\text{EtOAc}$  = 4 : 1) of the resulting residue. Separation of the diastereomers was achieved by recycling HPLC technique (hexane/ $\text{EtOAc}$  = 2 : 1) to give less polar isomer 3,3'-*syn*-**15b** and more polar one 3,3'-*anti*-**15b** in 43% (88.4 mg, 0.216 mmol) and 40% (82.3 mg, 0.201 mmol) yields, respectively. Structure of 3,3'-*syn*-**15b** was confirmed

by an X-ray crystallographic analysis. 3,4-*Anti* configuration of 3,3'-*anti*-**15b** was assigned by its NOESY spectrum.

For 3,3'-*syn*-**15b** Colorless crystals (from Et<sub>2</sub>O); Mp. 97.0-98.5 °C; IR (ATR)  $\nu$  2950, 1757, 1732, 1702, 1474, 1218, 1151, 819, 503 cm<sup>-1</sup>; <sup>1</sup>H NMR (400 MHz, CDCl<sub>3</sub>)  $\delta$  1.24 (3H, t, *J* = 7.1 Hz), 1.47-1.61 (2H, m), 1.72-1.87 (2H, m), 2.02-2.17 (2H, m), 2.20-2.30 (1H, m), 2.31-2.40 (1H, m), 2.50-2.57 (1H, m), 2.53 (2H, d, *J* = 7.5 Hz), 2.72 (1H, dd *J* = 9.2, 1.3 Hz), 3.41-3.47 (1H, m), 4.15 (2H, q, *J* = 7.1 Hz), 6.93 (1H, d, *J* = 8.5 Hz), 7.37-7.44 (2H, m); <sup>13</sup>C NMR (100 MHz, CDCl<sub>3</sub>)  $\delta$  14.1, 24.3, 29.4, 34.7, 37.6, 39.6, 40.9, 45.2, 50.4, 61.2, 117.5, 118.5, 125.0, 131.6, 132.2, 149.6, 167.1, 170.1, 208.9; MS (ESI-TOF) *m/z* 431 [M+Na]<sup>+</sup>, 433 [M+2+Na]<sup>+</sup>; HRMS calcd for C<sub>19</sub>H<sub>21</sub>BrNaO<sub>5</sub> [M+Na]<sup>+</sup>, 431.0470; found, 431.0475. Anal. Calcd for C<sub>19</sub>H<sub>21</sub>BrO<sub>5</sub>: C, 55.76; H, 5.17. Found: C, 55.73; H, 5.04.

For 3,3'-*anti*-**15b** Colorless oil; IR (neat)  $\nu$  2949, 1769, 1734, 1717, 1480, 1221, 1182, 1144, 822 cm<sup>-1</sup>; <sup>1</sup>H NMR (400 MHz, CDCl<sub>3</sub>)  $\delta$  1.23 (3H, t, *J* = 7.2 Hz), 1.36-1.58 (2H, m), 1.71-1.83 (1H, m), 2.01-2.13 (2H, m), 2.17-2.37 (4H, m), 2.54 (2H, d, 7.4 Hz), 2.72 (1H, dd, *J* = 9.2, 1.4 Hz), 3.53 (1H, td, *J* = 7.4, 1.4 Hz), 4.14 (2H, q, *J* = 7.2 Hz), 6.93 (1H, d, *J* = 8.5 Hz), 7.36-7.42 (2H, m); <sup>13</sup>C NMR (100 MHz, CDCl<sub>3</sub>)  $\delta$  14.1, 24.4, 29.1, 35.1, 37.8, 39.7, 40.8, 45.8, 50.5, 61.2, 117.4, 118.7, 125.1, 131.5, 132.2, 149.6, 166.9, 170.3, 209.0; MS (ESI-TOF) *m/z* 431 [M+Na]<sup>+</sup>, 433 [M+2+Na]<sup>+</sup>; HRMS calcd for C<sub>19</sub>H<sub>21</sub>BrNaO<sub>5</sub> [M+Na]<sup>+</sup>, 431.0470; found, 431.0465. Anal. Calcd for C<sub>19</sub>H<sub>21</sub>BrO<sub>5</sub>: C, 55.76; H, 5.17. Found: C, 55.55; H, 5.27.

**Ethyl 2-((3*S*\*,4*S*\*)-2-oxo-3-((*R*\*)-3-oxocycloheptyl)chroman-4-yl)acetate (3,3'-*syn*-**16a**) and ethyl 2-((3*S*\*,4*S*\*)-2-oxo-3-((*S*\*)-3-oxocycloheptyl)chroman-4-yl)acetate (3,3'-*anti*-**16a**)**

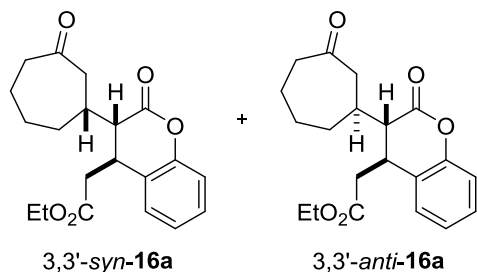

According to the synthetic procedure for **12a**, the reaction of 2*H*-chromen-2-one **3a** (146 mg, 0.999 mmol), *tert*-butyl((1-ethoxyvinyl)oxy)dimethylsilane **4** (243 mg, 1.20 mmol), and cyclohept-2-en-1-one (167 mg, 1.52 mmol) in the presence of triple carbon acid **1a** (9.9 mg, 9.9  $\mu$ mol) in CH<sub>2</sub>Cl<sub>2</sub> (4.0 mL) was conducted. After being stirred for 30 min at -78 °C, this reaction mixture was treated with 2% hydrochloric acid (5.0 mL) for 30 min at room temperature. Then, the mixture was diluted with H<sub>2</sub>O (10 mL) and extracted with Et<sub>2</sub>O (20 mL x 3). The combined organic layer was washed with saturated NaHCO<sub>3</sub> aqueous solution (15 mL) and brine (15 mL), dried over anhydrous MgSO<sub>4</sub>, and evaporated. A mixture of two diastereomers was obtained in 88% yield (304 mg, 0.883 mmol, 3,3'-*syn/anti* = 3.9 : 1) by column chromatography on silica gel (hexane/EtOAc = 2 : 1) of the resulting residue. Separation of the diastereomers was achieved by recycling HPLC technique (hexane/EtOAc = 2 : 1) to give less polar isomer 3,3'-*syn*-**16a** and more polar one 3,3'-*anti*-**16a** in 65% (224 mg, 0.650 mmol) and 18% (62.0 mg, 0.180 mmol) yields, respectively. 3,4-*Anti* configurations of both isomers were assigned by their NOESY spectra.

For 3,3'-*syn*-**16a** Colorless oil; IR (neat)  $\nu$  2931, 1762, 1731, 1700, 1457, 1220, 1158, 762 cm<sup>-1</sup>; <sup>1</sup>H NMR

(400 MHz, CDCl<sub>3</sub>)  $\delta$  1.21 (3H, t,  $J$  = 7.1 Hz), 1.29-1.41 (1H, m), 1.46-1.57 (1H, m), 1.58-1.94 (5H, m), 2.30-2.47 (2H, m), 2.48-2.59 (2H, m), 2.52 (2H, d,  $J$  = 7.5 Hz), 2.72 (1H, dd,  $J$  = 9.7, 1.0 Hz), 3.54 (1H, td,  $J$  = 7.5, 1.0 Hz), 4.11 (2H, q,  $J$  = 7.1 Hz), 7.02 (1H, d,  $J$  = 8.2 Hz), 7.11 (1H, t,  $J$  = 7.5 Hz), 7.23-7.31 (2H, m); <sup>13</sup>C NMR (100 MHz, CDCl<sub>3</sub>)  $\delta$  14.1, 23.7, 27.1, 34.2, 35.1, 35.2, 39.9, 43.6, 46.7, 49.9, 60.9, 116.7, 123.1, 125.0, 128.9, 129.1, 150.6, 168.2, 170.4, 212.1; MS (ESI-TOF)  $m/z$  345 [M+H]<sup>+</sup>; HRMS calcd for C<sub>20</sub>H<sub>25</sub>O<sub>5</sub> [M+H]<sup>+</sup>, 345.1702; found, 345.1711. Anal. Calcd for C<sub>20</sub>H<sub>24</sub>O<sub>5</sub>: C, 69.75; H, 7.02. Found: C, 69.58; H, 6.97.

For 3,3'-*anti*-**16a** Colorless oil; IR (neat)  $\nu$  2928, 1747, 1728, 1704, 1458, 1157, 1139, 755 cm<sup>-1</sup>; <sup>1</sup>H NMR (400 MHz, CDCl<sub>3</sub>)  $\delta$  1.22 (3H, t,  $J$  = 7.2 Hz), 1.23-1.39 (2H, m), 1.55-1.65 (1H, m), 1.72-1.87 (2H, m), 1.87-1.99 (2H, m), 2.31-2.49 (3H, m), 2.55 (2H, d,  $J$  = 7.4 Hz), 2.60 (1H, dd,  $J$  = 14.4, 11.1 Hz), 2.71 (1H, dd,  $J$  = 9.0, 1.4 Hz), 3.51-3.57 (1H, m), 4.13 (2H, q,  $J$  = 7.2 Hz), 7.05 (1H, d,  $J$  = 8.1 Hz), 7.12 (1H, t,  $J$  = 7.4 Hz), 7.21-7.33 (2H, m); <sup>13</sup>C NMR (100 MHz, CDCl<sub>3</sub>)  $\delta$  14.1, 24.0, 27.6, 33.7, 35.2, 35.7, 40.0, 43.5, 47.2, 50.6, 61.0, 116.9, 123.2, 125.0, 128.6, 129.2, 150.6, 168.3, 1707, 211.8; MS (ESI-TOF)  $m/z$  367 [M+Na]<sup>+</sup>; HRMS calcd for C<sub>20</sub>H<sub>24</sub>NaO<sub>5</sub> [M+Na]<sup>+</sup>, 367.1521; found, 367.1508. Anal. Calcd for C<sub>20</sub>H<sub>24</sub>O<sub>5</sub>: C, 69.75; H, 7.02. Found: C, 69.67; H, 7.21.

**Ethyl 2-((3*S*\*,4*S*\*)-6-bromo-2-oxo-3-((*R*\*)-3-oxocycloheptyl)chroman-4-yl)acetate (3,3'-*syn*-**16b**) and ethyl 2-((3*S*\*,4*S*\*)-6-bromo-2-oxo-3-((*S*\*)-3-oxocycloheptyl)chroman-4-yl)acetate (3,3'-*anti*-**16b**)**

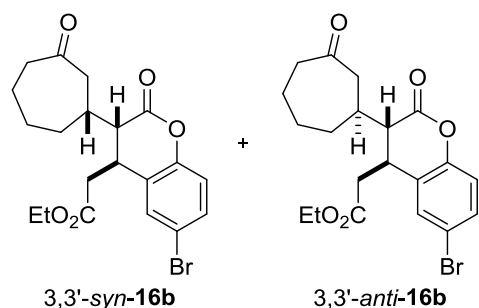

According to the synthetic procedure for **12b**, the reaction of 6-bromo-2*H*-chromen-2-one<sup>4</sup> **3b** (112 mg, 0.498 mmol), *tert*-butyl((1-ethoxyvinyl)oxy)dimethylsilane **4** (122 mg, 0.604 mmol), and cyclohept-2-en-1-one (166 mg, 1.51 mmol) in the presence of triple carbon acid **1a** (5.0 mg, 5.0  $\mu$ mol) in CH<sub>2</sub>Cl<sub>2</sub> (10 mL) was conducted. After being stirred for 30 min at -78 °C, this reaction mixture was treated with 10% hydrochloric acid (5.0 mL) for 30 min at room temperature. Then, the mixture was diluted with H<sub>2</sub>O (10 mL) and extracted with Et<sub>2</sub>O (20 mL x 3). The combined organic layer was washed with saturated NaHCO<sub>3</sub> aqueous solution (15 mL) and brine (15 mL), dried over anhydrous MgSO<sub>4</sub>, and evaporated. A mixture of two diastereomers was obtained in 82% yield (173 mg, 0.409 mmol, 3,3'-*syn/anti* = 5.8 : 1) by column chromatography on silica gel (hexane/EtOAc = 4 : 1) of the resulting residue. Separation of the diastereomers was achieved by recycling HPLC technique (hexane/EtOAc = 3 : 1) to give less polar isomer 3,3'-*syn*-**16b** and more polar one 3,3'-*anti*-**16b** in 64% (135 mg, 0.319 mmol) and 13% (27.4 mg, 64.7  $\mu$ mol) yields, respectively. Structures of both isomers were confirmed by X-ray crystallographic analyses.

For 3,3'-*syn*-**16b** Colorless solid (from hexane); Mp. 84.0-85.0 °C; IR (neat)  $\nu$  2930, 1754, 1732, 1704, 1475, 1216, 1153, 1119, 819 cm<sup>-1</sup>; <sup>1</sup>H NMR (400 MHz, CDCl<sub>3</sub>)  $\delta$  1.24 (3H, t,  $J$  = 7.2 Hz), 1.33-1.44 (1H, m), 1.48-1.59 (1H, m), 1.61-1.94 (5H, m), 2.35-2.43 (2H, m), 2.43-2.61 (2H, m), 2.52 (2H, d,  $J$  = 7.4 Hz), 2.72 (1H,

dd,  $J = 9.6, 1.5$  Hz), 3.53 (1H, td,  $J = 7.4, 1.5$  Hz), 4.14 (2H, q,  $J = 7.2$  Hz), 6.93 (1H, d,  $J = 8.4$  Hz), 7.38-7.43 (2H, m);  $^{13}\text{C}$  NMR (100 MHz,  $\text{CDCl}_3$ )  $\delta$  14.1, 23.6, 27.0, 34.2, 35.0, 35.2, 39.7, 43.6, 46.6, 49.4, 61.1, 117.4, 118.4, 125.3, 131.7, 132.1, 149.6, 167.4, 170.1, 211.9; MS (ESI-TOF)  $m/z$  445  $[\text{M}+\text{Na}]^+$ , 447  $[\text{M}+2+\text{Na}]^+$ ; HRMS calcd for  $\text{C}_{20}\text{H}_{23}\text{BrNaO}_5$   $[\text{M}+\text{Na}]^+$ , 445.0627; found, 445.0634. Anal. Calcd for  $\text{C}_{20}\text{H}_{23}\text{BrO}_5$ : C, 56.75; H, 5.48. Found: C, 56.52; H, 5.50.

For 3,3'-*anti*-**16b** Colorless solid (from hexane); Mp. 127-130 °C; IR (neat)  $\nu$  2932, 1755, 1732, 1694, 1474, 1218, 1162, 1113, 824  $\text{cm}^{-1}$ ;  $^1\text{H}$  NMR (400 MHz,  $\text{CDCl}_3$ )  $\delta$  1.23 (3H, t,  $J = 7.1$  Hz), 1.27-1.39 (2H, m), 1.53-1.66 (1H, m), 1.70-1.88 (2H, m), 1.88-1.98 (2H, m), 2.32-2.42 (2H, m), 2.46 (1H, dt,  $J = 15.2, 4.9$  Hz), 2.54 (2H, d,  $J = 7.4$  Hz), 2.60 (1H, dd,  $J = 15.2, 11.2$  Hz), 2.70 (1H, dd,  $J = 9.0, 1.6$  Hz), 3.47-3.54 (1H, m), 4.14 (2H, q,  $J = 7.1$  Hz), 6.94 (1H, d,  $J = 8.5$  Hz), 7.38 (1H, d,  $J = 2.1$  Hz), 7.40 (1H, dd,  $J = 8.5, 2.1$  Hz);  $^{13}\text{C}$  NMR (100 MHz,  $\text{CDCl}_3$ )  $\delta$  14.1, 23.9, 27.5, 33.8, 35.0, 35.7, 39.8, 43.5, 47.0, 50.3, 61.2, 117.4, 118.7, 125.3, 131.3, 132.2, 149.7, 167.5, 170.4, 211.6; MS (ESI-TOF)  $m/z$  445  $[\text{M}+\text{Na}]^+$ , 447  $[\text{M}+2+\text{Na}]^+$ ; HRMS calcd for  $\text{C}_{20}\text{H}_{23}\text{BrNaO}_5$   $[\text{M}+\text{Na}]^+$ , 445.0627; found, 445.0631. Anal. Calcd for  $\text{C}_{20}\text{H}_{23}\text{BrO}_5$ : C, 56.75; H, 5.48. Found: C, 57.02; H, 5.63.

**Ethyl 2-((2*R*\*,3'*R*\*,4'*S*\*)-2',4-dioxo-[2,3'-bichroman]-4'-yl)acetate (3,2'-*syn*-17) and ethyl 2-((2*S*\*,3'*R*\*,4'*S*\*)-2',4-dioxo-[2,3'-bichroman]-4'-yl)acetate (3,2'-*anti*-17)**

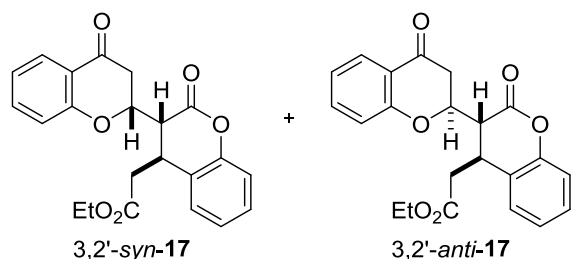

According to the synthetic procedure for **12a**, the reaction of 2*H*-chromen-2-one **3a** (73.1 mg, 0.500 mmol), *tert*-butyl((1-ethoxyvinyl)oxy)dimethylsilane **4** (125 mg, 0.618 mmol), and 4*H*-chromen-4-one (109 mg, 0.746 mmol) in the presence of triple carbon acid **1a** (5.0 mg, 5.0  $\mu\text{mol}$ ) in  $\text{CH}_2\text{Cl}_2$  (2.5 mL) was conducted. After being stirred for 30 min at  $-78$  °C, this reaction mixture was treated with 10% hydrochloric acid (5.0 mL) for 30 min at room temperature. Then, the mixture was diluted with  $\text{H}_2\text{O}$  (20 mL) and extracted with  $\text{Et}_2\text{O}$  (20 mL x 3). The combined organic layer was washed with saturated  $\text{NaHCO}_3$  aqueous solution (15 mL) and brine (15 mL), dried over anhydrous  $\text{MgSO}_4$ , and evaporated. A mixture of two diastereomers was obtained in 99% yield (189 mg, 0.497 mmol, 3,2'-*syn/anti* = 8.5 : 1) by column chromatography on silica gel (hexane/ $\text{EtOAc}$  = 2 : 1) of the resulting residue. Separation of the diastereomers was achieved by recycling HPLC technique (hexane/ $\text{EtOAc}$  = 1 : 1) to give less polar isomer 3,2'-*anti*-**17** and more polar one 3,2'-*syn*-**17** in 81% (154 mg, 0.405 mmol) and 9.2% (17.5 mg, 46.0  $\mu\text{mol}$ ) yields, respectively. Structure of 3,2'-*anti*-**17** was confirmed by an X-ray crystallographic analysis. 3,4-*Anti* configuration of 3,2'-*syn*-**17** was assigned by its NOESY spectrum.

For 3,2'-*syn*-**17** Pale yellow oil; IR (neat)  $\nu$  2978, 2922, 1757, 1730, 1688, 1603, 1460, 1221, 759  $\text{cm}^{-1}$ ;  $^1\text{H}$  NMR (400 MHz,  $\text{CDCl}_3$ )  $\delta$  1.23 (3H, t,  $J = 7.1$  Hz), 2.63 (1H, dd,  $J = 16.7, 6.8$  Hz), 2.68 (1H, dd,  $J = 16.7, 7.8$  Hz), 2.78 (1H, dd,  $J = 16.8, 3.2$  Hz), 2.89 (1H, dd,  $J = 16.8, 12.7$  Hz), 3.31 (1H, dd,  $J = 6.6, 1.6$  Hz), 3.53-3.59 (1H, m), 4.14 (2H, q,  $J = 7.1$  Hz), 4.52 (1H, ddd  $J = 12.7, 6.6, 3.2$  Hz), 6.67 (1H, brd,  $J = 8.4$  Hz), 6.99 (1H, td,

$J = 7.5, 1.0$  Hz), 7.08 (1H, dd,  $J = 8.2, 1.0$  Hz), 7.14 (1H, td,  $J = 7.5, 1.0$  Hz), 7.24 (1H, dd,  $J = 7.5, 1.7$  Hz), 7.28-7.35 (1H, m), 7.37-7.44 (1H, m), 7.81 (1H, dd,  $J = 7.2, 1.7$  Hz);  $^{13}\text{C}$  NMR (100 MHz,  $\text{CDCl}_3$ )  $\delta$  14.2, 35.3, 40.0, 40.9, 49.4, 61.2, 76.9, 117.0, 118.0, 120.7, 122.1, 122.8, 125.1, 126.9, 128.3, 129.3, 136.3, 150.9, 160.4, 165.7, 170.4, 190.5; MS (ESI-TOF)  $m/z$  403  $[\text{M}+\text{Na}]^+$ ; HRMS calcd for  $\text{C}_{22}\text{H}_{20}\text{NaO}_6$   $[\text{M}+\text{Na}]^+$ , 403.1158; found, 403.1167.

For 3,2'-*anti*-**17** Colorless crystals (from  $\text{Et}_2\text{O}$ ); Mp. 86.0-87.5 °C; IR (ATR)  $\nu$  2983, 2926, 1761, 1728, 1682, 1605, 1216, 1149, 1029, 767  $\text{cm}^{-1}$ ;  $^1\text{H}$  NMR (400 MHz,  $\text{CDCl}_3$ )  $\delta$  1.22 (3H, t,  $J = 7.1$  Hz), 2.61 (1H, dd,  $J = 16.2, 7.5$  Hz), 2.66 (1H, dd,  $J = 16.2, 7.5$  Hz), 2.70 (1H, dd,  $J = 16.9, 2.9$  Hz), 2.92 (1H, dd,  $J = 16.9, 12.8$  Hz), 3.33 (1H, dd,  $J = 8.9, 1.4$  Hz), 4.00 (1H, td,  $J = 7.5, 1.4$  Hz), 4.13 (2H, q,  $J = 7.1$  Hz), 4.34 (1H, ddd,  $J = 12.8, 8.9, 2.9$  Hz), 6.94 (1H, brd,  $J = 8.4$  Hz), 6.99-7.04 (1H, m), 7.06 (1H, d,  $J = 8.0$  Hz), 7.12 (1H, td,  $J = 7.5, 1.1$  Hz), 7.26-7.30 (1H, m), 7.30 (1H, d,  $J = 7.5$  Hz), 7.44-7.50 (1H, m), 7.83 (1H, dd,  $J = 7.8, 1.7$  Hz);  $^{13}\text{C}$  NMR (100 MHz,  $\text{CDCl}_3$ )  $\delta$  14.1, 33.6, 39.8, 41.3, 50.6, 61.1, 74.1, 117.0, 117.8, 120.9, 122.1, 122.7, 125.3, 127.0, 129.1, 129.3, 136.2, 150.5, 160.3, 165.8, 170.5, 190.3; MS (ESI-TOF)  $m/z$  403  $[\text{M}+\text{Na}]^+$ ; HRMS calcd for  $\text{C}_{22}\text{H}_{20}\text{NaO}_6$   $[\text{M}+\text{Na}]^+$ , 403.1158; found, 403.1148. Anal. Calcd for  $\text{C}_{22}\text{H}_{20}\text{O}_6$ : C, 69.46; H, 5.30. Found: C, 69.48; H, 5.31.

**Ethyl-2-((2*S*\*,3*S*\*,3'*R*\*,4'*S*\*)-3-bromo-3-methyl-2',4-dioxo-[2,3'-bichroman]-4'-yl)acetate (3,2'-*syn*-**18**) and ethyl 2-((2*R*\*,3*R*\*,3'*R*\*,4'*S*\*)-3-bromo-3-methyl-2',4-dioxo-[2,3'-bichroman]-4'-yl)acetate (3,2'-*anti*-**18**)**

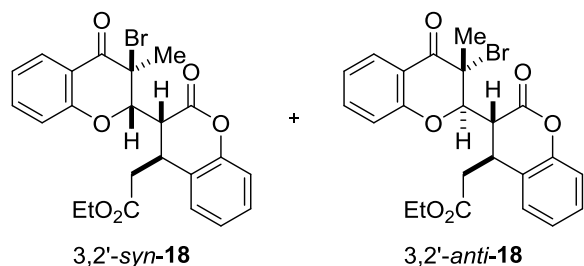

To a solution of 2*H*-chromen-2-one **3a** (73.2 mg, 0.501 mmol) and triple carbon acid **1a** (5.0 mg, 5.0  $\mu\text{mol}$ ) in  $\text{CH}_2\text{Cl}_2$  (1.0 mL), a solution of *tert*-butyl((1-ethoxyvinyl)oxy)dimethylsilane **4** (124 mg, 0.613 mmol) in  $\text{CH}_2\text{Cl}_2$  (0.5 mL) was added at  $-78$  °C. After being stirred for 30 min, a solution of 3-methylchromone<sup>8</sup> (120 mg, 0.749 mmol) in  $\text{CH}_2\text{Cl}_2$  (1.0 mL) was added to the reaction mixture and it was additionally stirred for 1.5 h at the same temperature. After that, the reaction mixture was treated with a solution of bromine (170 mg, 1.06 mmol) for 30 min at  $-78$  °C. The resulting mixture was quenched with a saturated aqueous  $\text{Na}_2\text{S}_2\text{O}_3$  solution (15 mL) and extracted with  $\text{Et}_2\text{O}$  (20 mL x 3). The combined organic layer was washed with brine (20 mL), dried over anhydrous  $\text{MgSO}_4$  and concentrated under reduced pressure. Thus obtained residue was purified by column chromatography on silica gel (hexane/  $\text{EtOAc} = 6 : 1$ ) to give an inseparable mixture of the desired adduct and a small amount of **6a**. Isolation of the products was achieved by recycling HPLC technique (hexane/ $\text{EtOAc} = 4 : 1$ ) to give less polar isomer 3,2'-*anti*-**18** and more polar isomer 3,2'-*syn*-**18** in 42% (100 mg, 0.212 mmol) and 30% (70.3 mg, 0.149 mmol) yields, respectively. Structure of 3,2'-*anti*-**18** was determined by an X-ray crystallographic analysis. 3,4-*Anti* and 2',3'-*anti* configurations of 3,2'-*syn*-**18** were assigned by its NOESY spectrum.

For 3,2'-*syn*-**18** Colorless crystals (from  $\text{EtOAc}$ ); Mp. 117-118 °C; IR (ATR)  $\nu$  2980, 1748, 1727, 1693,

1606, 1459, 1166, 1156, 1145, 1040, 751, 478  $\text{cm}^{-1}$ ;  $^1\text{H}$  NMR (400 MHz,  $\text{CDCl}_3$ )  $\delta$  1.23 (3H, t,  $J = 7.2$  Hz), 2.07 (3H, s), 2.59 (1H, dd,  $J = 16.4, 7.2$  Hz), 2.64 (1H, dd,  $J = 16.4, 8.0$  Hz), 3.58-3.63 (1H, m), 3.65 (1H, dd,  $J = 3.7, 1.6$  Hz), 4.09-4.19 (2H, m), 4.53 (1H, d,  $J = 3.7$  Hz), 6.38 (1H, brd,  $J = 8.3$  Hz), 6.99-7.07 (2H, m), 7.13 (1H, td,  $J = 7.5, 1.1$  Hz), 7.28-7.32 (2H, m), 7.32-7.38 (1H, m), 7.87 (1H, dd,  $J = 7.9, 1.6$  Hz);  $^{13}\text{C}$  NMR (100 MHz,  $\text{CDCl}_3$ )  $\delta$  14.1, 21.6, 38.9, 39.5, 46.3, 61.2, 64.5, 85.0, 116.9, 117.4, 117.7, 122.6, 123.0, 125.1, 128.3, 129.0, 129.3, 136.5, 151.1, 158.1, 165.6, 170.3, 186.6; MS (ESI-TOF)  $m/z$  495  $[\text{M}+\text{Na}]^+$ , 497  $[\text{M}+2+\text{Na}]^+$ ; HRMS calcd for  $\text{C}_{23}\text{H}_{21}\text{BrNaO}_6$   $[\text{M}+\text{Na}]^+$ , 495.0419; found, 495.0418. Anal. Calcd for  $\text{C}_{23}\text{H}_{21}\text{BrO}_6$ : C, 58.37; H, 4.47. Found: C, 58.41; H, 4.59.

For 3,2'-*anti*-**18** Colorless crystals (from EtOAc); Mp. 149-150  $^\circ\text{C}$ ; IR (ATR)  $\nu$  2932, 1751, 1725, 1685, 1608, 1459, 1202, 1179, 1028, 749, 479  $\text{cm}^{-1}$ ;  $^1\text{H}$  NMR (400 MHz,  $\text{CDCl}_3$ )  $\delta$  1.18 (3H, t,  $J = 7.2$  Hz), 2.12 (3H, s), 2.47 (2H, d,  $J = 7.5$  Hz), 3.42 (1H, dd,  $J = 6.2, 1.2$  Hz), 3.49 (1H, brt,  $J = 7.4$  Hz), 4.03-4.13 (2H, m), 4.83 (1H, d,  $J = 6.2$  Hz), 6.52 (1H, d,  $J = 8.3$  Hz), 6.79 (1H, d,  $J = 7.2$  Hz), 6.85-6.92 (1H, m), 7.00 (1H, t,  $J = 8.1$  Hz), 7.05 (1H, d,  $J = 8.1$  Hz), 7.18-7.24 (1H, m), 7.28-7.34 (1H, m), 7.86 (1H, dd,  $J = 7.8, 1.6$  Hz);  $^{13}\text{C}$  NMR (100 MHz,  $\text{CDCl}_3$ )  $\delta$  14.1, 21.8, 34.1, 39.9, 46.6, 61.1, 61.3, 84.0, 116.8, 117.3, 117.5, 112.3, 112.8, 125.1, 127.7, 128.3, 129.1, 136.8, 150.3, 158.3, 166.7, 170.1, 186.3; MS (ESI-TOF)  $m/z$  495  $[\text{M}+\text{Na}]^+$ , 497  $[\text{M}+2+\text{Na}]^+$ ; HRMS calcd for  $\text{C}_{23}\text{H}_{21}\text{BrNaO}_6$   $[\text{M}+\text{Na}]^+$ , 495.0419; found, 495.0417. Anal. Calcd for  $\text{C}_{23}\text{H}_{21}\text{BrO}_6$ : C, 58.37; H, 4.47. Found: C, 58.40; H, 4.94.

## 5. GTP studies by using carbon acids

**Typical procedure:**  $\text{Ff}_2\text{CHCH}_2\text{CHTf}_2$  **1b** (1.43 mg, 2.50  $\mu\text{mol}$ ) was added to a solution of methyl methacrylate **19a** (500 mg, 5.00 mmol) and KSA **20** (8.7 mg, 50  $\mu\text{mol}$ ) in  $\text{CH}_2\text{Cl}_2$  (4.50 mL) under an argon atmosphere at room temperature. After stirring for 3 h, the polymerization was quenched by adding a small amount of methanol. Aliquots were removed from the reaction mixture to determine the conversion of **19a** based on its  $^1\text{H}$  NMR spectrum. The reaction mixture was purified by reprecipitated to large amount of *n*-hexane, followed by drying the product to give the **21a** as a white solid. Yield, 495 mg (99 %). SEC (RI):  $M_{n(\text{SEC})}$ , 11,300  $\text{g mol}^{-1}$ ;  $M_w/M_n$ , 1.04.

The GTPs of methyl methacrylate **19a** and butyl acrylate **19b** in the presence of carbon acid **1a** (3.56 mg, 5.0  $\mu\text{mol}$ ) or zwitterion **2** (2.63 mg, 5.0  $\mu\text{mol}$ ) as an acid catalyst were carried out with KSA **20** or **22** by a similar procedure. These results are summarized in Table S1.  $\text{Ff}_2\text{CHCH}_2\text{CHTf}_2$  **1b** nicely promoted desired polymerization in both cases of **19a** and **19b** (entries 1, 4 and 5), while triple carbon acid **1a** did not show a considerable level of catalysis in the GTP of **19a** with KSA **20** (entry 2). On the other hand, monomer **19b** was polymerized with KSA **22** to give the corresponding polymer **21b** in the presence of a catalytic amount of **1a** (entry 6). Compared to methacrylate **19a**, acrylate **19b** has relatively higher reactivity. For this, less effective carbon acid **1a** worked as a suitable polymerization catalyst for **19b**.

**Table S1.** GTP of methyl methacrylate **19a** and butyl acrylate **19b**

$n$   $\text{R}^1\text{C}(\text{OR}^2)=\text{CH}_2$  +  $\text{Me}_2\text{C}(\text{OMe})=\text{C}(\text{OMe})\text{OSiR}_3$   $\xrightarrow[\text{rt}]{\text{Acid (cat)}}$  Polymer **21a, 21b**

**19a** ( $\text{R}^1 = \text{R}^2 = \text{Me}$ )      **20** ( $\text{R}_3\text{Si} = \text{Me}_3\text{Si}$ )  
**19b** ( $\text{R}^1 = \text{H}, \text{R}^2 = \text{Bu}$ )      **22** ( $\text{R}_3\text{Si} = i\text{-Pr}_3\text{Si}$ )

| Entry | <b>19</b>  | Acid (equiv)                                                   | KSA       | Solvent                  | Conversion of <b>19</b> <sup>b</sup> (%) | $M_{n(\text{SEC})}^c$ ( $\text{g mol}^{-1}$ ) | $M_w/M_n^c$ |
|-------|------------|----------------------------------------------------------------|-----------|--------------------------|------------------------------------------|-----------------------------------------------|-------------|
| 1     | <b>19a</b> | $\text{Ff}_2\text{CHCH}_2\text{CHTf}_2$ <b>1b</b> (0.02 equiv) | <b>20</b> | $\text{CH}_2\text{Cl}_2$ | >99                                      | 11,300                                        | 1.04        |
| 2     | <b>19a</b> | Carbon acid <b>1a</b> (0.05 equiv)                             | <b>20</b> | $\text{CH}_2\text{Cl}_2$ | <1                                       | --                                            | --          |
| 3     | <b>19a</b> | Zwitterion <b>2</b> (0.05 equiv)                               | <b>20</b> | $\text{CH}_2\text{Cl}_2$ | <1                                       | --                                            | --          |
| 4     | <b>19b</b> | $\text{Ff}_2\text{CHCH}_2\text{CHTf}_2$ <b>1b</b> (0.02 equiv) | <b>20</b> | $\text{CH}_2\text{Cl}_2$ | 77.0                                     | 11,400                                        | 1.47        |
| 5     | <b>19b</b> | $\text{Ff}_2\text{CHCH}_2\text{CHTf}_2$ <b>1b</b> (0.02 equiv) | <b>22</b> | toluene                  | >99                                      | 14,400                                        | 1.02        |
| 6     | <b>19b</b> | Carbon acid <b>1a</b> (0.02 equiv)                             | <b>22</b> | toluene                  | >99                                      | 14,500                                        | 1.02        |
| 7     | <b>19b</b> | Zwitterion <b>2</b> (0.05 equiv)                               | <b>22</b> | toluene                  | <1                                       | --                                            | --          |

<sup>a</sup> Ar atmosphere; **19**/KSA/Acid = 100 : 1 : 0.02-0.05,  $[\text{19}]_0 = 1.0 \text{ mol L}^{-1}$ .

Reaction time; 3 h for GTP of **19a**, 5 min for GTP of **19b**.

<sup>b</sup> Determined by  $^1\text{H}$  NMR in  $\text{CDCl}_3$ .

<sup>c</sup> Determined by size exclusion chromatography (SEC) in THF using poly(methyl methacrylate) standards.

## 6. X-ray crystallographic data

Crystallographic data for the X-ray crystal structure analysis of **7a**, 3,3'-*syn*-**14a**, 3,3'-*syn*-**14b**, 3,3'-*syn*-**15a**, 3,3'-*syn*-**15b**, 3,3'-*syn*-**16b**, 3,3'-*anti*-**16b**, 3,2'-*anti*-**17**, and 3,2'-*anti*-**18** have been deposited with Cambridge Crystallographic Data Center (CCDC) as supplementary publication Nos. CCDC 1440383 (**7a**), 1440387 (3,3'-*syn*-**14a**), 1440388 (3,3'-*syn*-**14b**), 1440389 (3,3'-*syn*-**15a**), 1440390 (3,3'-*syn*-**15b**), 1440391 (3,3'-*syn*-**16b**), 1440384 (3,3'-*anti*-**16b**), 1440385 (3,2'-*anti*-**17**), and 1440386 (3,2'-*anti*-**18**). These data can be obtained free of charge from the CCDC via [www.ccdc.cam.ac.uk/data\\_request/cif](http://www.ccdc.cam.ac.uk/data_request/cif).

**Table S2.** Crystal data and structure refinement for **7a**.

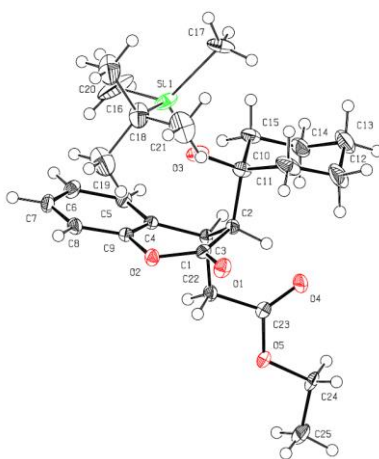

|                                                        |                                                                        |
|--------------------------------------------------------|------------------------------------------------------------------------|
| $C_{25}H_{38}O_5Si$                                    | $F(000) = 968$                                                         |
| $M_r = 446.64$                                         | $D_x = 1.178 \text{ Mg m}^{-3}$                                        |
| Monoclinic, $P2_1/n$                                   | Mo $K\alpha$ radiation, $\lambda = 0.71073 \text{ \AA}$                |
| Hall symbol: $-P\ 2_1n$                                | Cell parameters from 5017 reflections                                  |
| $a = 10.5246 (7) \text{ \AA}$                          | $\theta = 2.5\text{--}27.5^\circ$                                      |
| $b = 7.1824 (5) \text{ \AA}$                           | $\mu = 0.12 \text{ mm}^{-1}$                                           |
| $c = 33.424 (2) \text{ \AA}$                           | $T = 90 \text{ K}$                                                     |
| $\beta = 94.7154 (10)^\circ$                           | Block, colorless                                                       |
| $V = 2518.0 (3) \text{ \AA}^3$                         | $0.29 \times 0.17 \times 0.06 \text{ mm}$                              |
| $Z = 4$                                                |                                                                        |
| Bruker APEXII CCD area detector diffractometer         | 4464 independent reflections                                           |
| Radiation source: Bruker TXS fine-focus rotating anode | 3789 reflections with $I > 2\sigma(I)$                                 |
| Bruker Helios multilayer confocal mirror               | $R_{\text{int}} = 0.021$                                               |
| Detector resolution: $8.333 \text{ pixels mm}^{-1}$    | $\theta_{\text{max}} = 25.0^\circ$ , $\theta_{\text{min}} = 2.1^\circ$ |
| phi and $\omega$ scans                                 | $h = -9 \rightarrow 12$                                                |
| Absorption correction: analytical                      | $k = -8 \rightarrow 7$                                                 |
| Crystal Faces plugin in Bruker APEX2 software          |                                                                        |
| $T_{\text{min}} = 0.965$ , $T_{\text{max}} = 0.993$    | $l = -39 \rightarrow 37$                                               |
| 11783 measured reflections                             |                                                                        |
| Refinement on $F^2$                                    | Primary atom site location: structure-invariant direct methods         |



|                                 |                                                          |
|---------------------------------|----------------------------------------------------------|
| Least-squares matrix: full      | Secondary atom site location: difference Fourier map     |
| $R[F^2 > 2\sigma(F^2)] = 0.038$ | Hydrogen site location: inferred from neighbouring sites |
| $wR(F^2) = 0.099$               | H-atom parameters constrained                            |
| $S = 1.03$                      | $w = 1/[\sigma^2(F_o^2) + (0.0447P)^2 + 1.2637P]$        |
|                                 | where $P = (F_o^2 + 2F_c^2)/3$                           |
| 4464 reflections                | $(\Delta/\sigma)_{\max} < 0.001$                         |
| 355 parameters                  | $\Delta_{\max} = 0.26 \text{ e } \text{\AA}^{-3}$        |
| 48 restraints                   | $\Delta_{\min} = -0.23 \text{ e } \text{\AA}^{-3}$       |

**Table S3.** Crystal data and structure refinement for 3,3'-*syn*-**14a**.

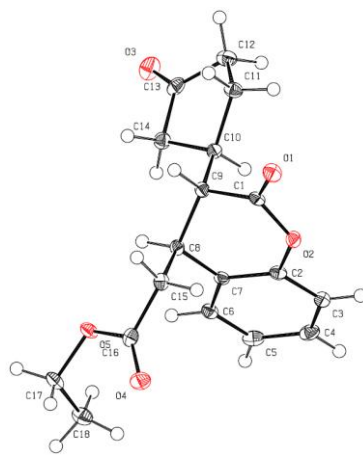

|                                                        |                                                            |
|--------------------------------------------------------|------------------------------------------------------------|
| $\text{C}_{18}\text{H}_{20}\text{O}_5$                 | $F(000) = 1344$                                            |
| $M_r = 316.34$                                         | $D_x = 1.372 \text{ Mg m}^{-3}$                            |
| Orthorhombic, $Pca2_1$                                 | Mo $K\alpha$ radiation, $\lambda = 0.71073 \text{ \AA}$    |
| Hall symbol: $P\ 2c\ -2ac$                             | Cell parameters from 5810 reflections                      |
| $a = 25.583 (3) \text{ \AA}$                           | $\theta = 2.3\text{--}27.5^\circ$                          |
| $b = 6.8787 (8) \text{ \AA}$                           | $\mu = 0.10 \text{ mm}^{-1}$                               |
| $c = 17.4038 (19) \text{ \AA}$                         | $T = 90 \text{ K}$                                         |
| $V = 3062.7 (6) \text{ \AA}^3$                         | Block, colourless                                          |
| $Z = 8$                                                | $0.20 \times 0.18 \times 0.08 \text{ mm}$                  |
| Bruker APEXII CCD area detector diffractometer         | 4775 independent reflections                               |
| Radiation source: Bruker TXS fine-focus rotating anode | 4424 reflections with $I > 2\sigma(I)$                     |
| Bruker Helios multilayer confocal mirror               | $R_{\text{int}} = 0.029$                                   |
| Detector resolution: $8.333 \text{ pixels mm}^{-1}$    | $\theta_{\max} = 25.0^\circ$ , $\theta_{\min} = 1.6^\circ$ |
| phi and $\omega$ scans                                 | $h = -30 \rightarrow 27$                                   |
| Absorption correction: analytical                      | $k = -8 \rightarrow 8$                                     |
| Crystal Faces plugin in Bruker APEX2 software          |                                                            |
| $T_{\min} = 0.980$ , $T_{\max} = 0.992$                | $l = -18 \rightarrow 20$                                   |
| 14062 measured reflections                             |                                                            |
| Refinement on $F^2$                                    | Secondary atom site location: difference Fourier map       |

Least-squares matrix: full

$$R[F^2 > 2\sigma(F^2)] = 0.033$$

$$wR(F^2) = 0.080$$

$$S = 1.04$$

4775 reflections

417 parameters

1 restraint

Primary atom site location: structure-invariant direct methods  
Flack parameter: 1.0 (7)

Hydrogen site location: inferred from neighbouring sites

H-atom parameters constrained

$$w = 1/[\sigma^2(F_o^2) + (0.0397P)^2 + 0.7653P]$$

$$\text{where } P = (F_o^2 + 2F_c^2)/3$$

$$(\Delta/\sigma)_{\max} = 0.001$$

$$\Delta_{\max} = 0.16 \text{ e } \text{\AA}^{-3}$$

$$\Delta_{\min} = -0.19 \text{ e } \text{\AA}^{-3}$$

Absolute structure: Flack H D (1983), Acta Cryst. A39, 876-881

**Table S4.** Crystal data and structure refinement for 3,3'-*syn*-**14b**.

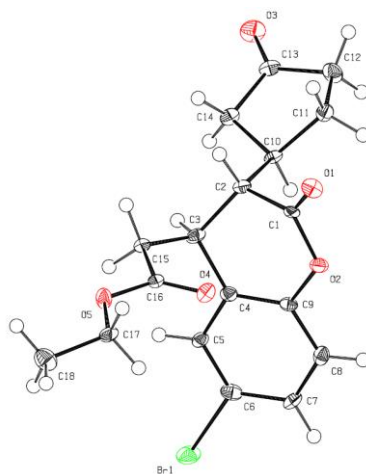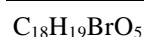

$$M_r = 395.24$$

Monoclinic, *Pc*

Hall symbol: *P* -2yc

$$a = 11.3068 (19) \text{ \AA}$$

$$b = 9.6829 (16) \text{ \AA}$$

$$c = 24.116 (4) \text{ \AA}$$

$$\beta = 103.091 (2)^\circ$$

$$V = 2571.7 (7) \text{ \AA}^3$$

$$Z = 6$$

$$F(000) = 1212$$

$$D_x = 1.531 \text{ Mg m}^{-3}$$

Mo *K*α radiation,  $\lambda = 0.71073 \text{ \AA}$

Cell parameters from 3963 reflections

$$\theta = 3.1\text{--}27.1^\circ$$

$$\mu = 2.42 \text{ mm}^{-1}$$

$$T = 90 \text{ K}$$

Block, colourless

$$0.15 \times 0.13 \times 0.06 \text{ mm}$$

Bruker APEXII CCD area detector

diffractometer

Radiation source: Bruker TXS fine-focus rotating anode

Bruker Helios multilayer confocal mirror

Detector resolution: 8.333 pixels  $\text{mm}^{-1}$

phi and  $\omega$  scans

6361 independent reflections

5637 reflections with  $I > 2\sigma(I)$

$$R_{\text{int}} = 0.031$$

$$\theta_{\max} = 25.0^\circ, \theta_{\min} = 1.7^\circ$$

$$h = -12 \rightarrow 13$$

|                                                                |                                                                |
|----------------------------------------------------------------|----------------------------------------------------------------|
| Absorption correction: analytical                              | $k = -9 \rightarrow 11$                                        |
| Crystal Faces plugin in Bruker APEX2 software                  |                                                                |
| $T_{\min} = 0.713$ , $T_{\max} = 0.868$                        | $l = -28 \rightarrow 15$                                       |
| 12184 measured reflections                                     |                                                                |
| Refinement on $F^2$                                            | Secondary atom site location: difference Fourier map           |
| Least-squares matrix: full                                     | Hydrogen site location: inferred from neighbouring sites       |
| $R[F^2 > 2\sigma(F^2)] = 0.029$                                | H-atom parameters constrained                                  |
| $wR(F^2) = 0.059$                                              | $w = 1/[\sigma^2(F_o^2) + (0.P)^2]$                            |
|                                                                | where $P = (F_o^2 + 2F_c^2)/3$                                 |
| $S = 0.96$                                                     | $(\Delta/\sigma)_{\max} = 0.001$                               |
| 6361 reflections                                               | $\Delta_{\max} = 0.49 \text{ e } \text{\AA}^{-3}$              |
| 652 parameters                                                 | $\Delta_{\min} = -0.47 \text{ e } \text{\AA}^{-3}$             |
| 452 restraints                                                 | Absolute structure: Flack H D (1983), Acta Cryst. A39, 876-881 |
| Primary atom site location: structure-invariant direct methods | Flack parameter: -0.001 (6)                                    |

**Table S5.** Crystal data and structure refinement for 3,3'-*syn*-**15a**.

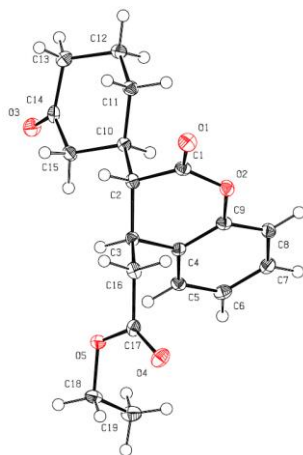

|                                                |                                                         |
|------------------------------------------------|---------------------------------------------------------|
| $C_{19}H_{22}O_5$                              | $F(000) = 704$                                          |
| $M_r = 330.37$                                 | $D_x = 1.362 \text{ Mg m}^{-3}$                         |
| Monoclinic, $P2_1/c$                           | Mo $K\alpha$ radiation, $\lambda = 0.71073 \text{ \AA}$ |
| Hall symbol: -P 2ybc                           | Cell parameters from 3451 reflections                   |
| $a = 15.1059 (12) \text{ \AA}$                 | $\theta = 2.5\text{--}27.6^\circ$                       |
| $b = 7.0831 (6) \text{ \AA}$                   | $\mu = 0.10 \text{ mm}^{-1}$                            |
| $c = 16.4912 (13) \text{ \AA}$                 | $T = 90 \text{ K}$                                      |
| $\beta = 114.080 (1)^\circ$                    | Block, colourless                                       |
| $V = 1610.9 (2) \text{ \AA}^3$                 | $0.22 \times 0.14 \times 0.07 \text{ mm}$               |
| $Z = 4$                                        |                                                         |
| Bruker APEXII CCD area detector diffractometer | 2841 independent reflections                            |

|                                                        |                                                                        |
|--------------------------------------------------------|------------------------------------------------------------------------|
| Radiation source: Bruker TXS fine-focus rotating anode | 2505 reflections with $I > 2\sigma(I)$                                 |
| Bruker Helios multilayer confocal mirror               | $R_{\text{int}} = 0.020$                                               |
| Detector resolution: 8.333 pixels mm <sup>-1</sup>     | $\theta_{\text{max}} = 25.0^\circ$ , $\theta_{\text{min}} = 1.5^\circ$ |
| phi and $\omega$ scans                                 | $h = -15 \rightarrow 17$                                               |
| Absorption correction: analytical                      | $k = -8 \rightarrow 8$                                                 |
| Crystal Faces plugin in Bruker APEX2 software          | $l = -19 \rightarrow 19$                                               |
| $T_{\text{min}} = 0.979$ , $T_{\text{max}} = 0.993$    |                                                                        |
| 7482 measured reflections                              |                                                                        |
| Refinement on $F^2$                                    | Primary atom site location: structure-invariant direct methods         |
| Least-squares matrix: full                             | Secondary atom site location: difference Fourier map                   |
| $R[F^2 > 2\sigma(F^2)] = 0.033$                        | Hydrogen site location: inferred from neighbouring sites               |
| $wR(F^2) = 0.087$                                      | H-atom parameters constrained                                          |
| $S = 1.02$                                             | $w = 1/[\sigma^2(F_o^2) + (0.0426P)^2 + 0.6685P]$                      |
|                                                        | where $P = (F_o^2 + 2F_c^2)/3$                                         |
| 2841 reflections                                       | $(\Delta/\sigma)_{\text{max}} = 0.001$                                 |
| 218 parameters                                         | $\Delta_{\text{max}} = 0.24 \text{ e } \text{\AA}^{-3}$                |
| 156 restraints                                         | $\Delta_{\text{min}} = -0.20 \text{ e } \text{\AA}^{-3}$               |

**Table S6.** Crystal data and structure refinement for 3,3'-*syn*-**15b**.

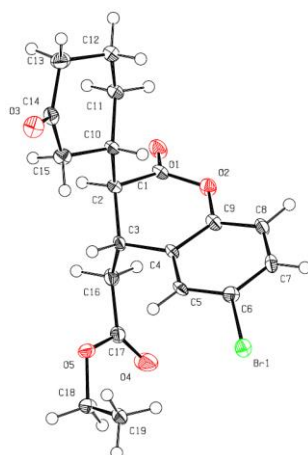

|                                          |                                                         |
|------------------------------------------|---------------------------------------------------------|
| $\text{C}_{19}\text{H}_{21}\text{BrO}_5$ | $Z = 4$                                                 |
| $M_r = 409.27$                           | $F(000) = 840$                                          |
| Triclinic, $P^-1$                        | $D_x = 1.546 \text{ Mg m}^{-3}$                         |
| Hall symbol: $-P\ 1$                     | Mo $K\alpha$ radiation, $\lambda = 0.71073 \text{ \AA}$ |
| $a = 8.854 (3) \text{ \AA}$              | Cell parameters from 4477 reflections                   |
| $b = 14.268 (4) \text{ \AA}$             | $\theta = 2.4\text{--}27.4^\circ$                       |
| $c = 14.396 (4) \text{ \AA}$             | $\mu = 2.37 \text{ mm}^{-1}$                            |
| $\alpha = 94.289 (4)^\circ$              | $T = 90 \text{ K}$                                      |
| $\beta = 102.730 (4)^\circ$              | Block, colourless                                       |
| $\gamma = 95.207 (4)^\circ$              | $0.31 \times 0.11 \times 0.05 \text{ mm}$               |

$$V = 1758.1 (9) \text{ \AA}^3$$

|                                                        |                                                                        |
|--------------------------------------------------------|------------------------------------------------------------------------|
| Bruker APEXII CCD area detector diffractometer         | 6156 independent reflections                                           |
| Radiation source: Bruker TXS fine-focus rotating anode | 4996 reflections with $I > 2\sigma(I)$                                 |
| Bruker Helios multilayer confocal mirror               | $R_{\text{int}} = 0.049$                                               |
| Detector resolution: 8.333 pixels $\text{mm}^{-1}$     | $\theta_{\text{max}} = 25.0^\circ$ , $\theta_{\text{min}} = 1.4^\circ$ |
| phi and $\omega$ scans                                 | $h = -10 \rightarrow 10$                                               |
| Absorption correction: analytical                      | $k = -16 \rightarrow 16$                                               |
| Crystal Faces plugin in Bruker APEX2 software          |                                                                        |
| $T_{\text{min}} = 0.528$ , $T_{\text{max}} = 0.891$    | $l = -17 \rightarrow 17$                                               |
| 17095 measured reflections                             |                                                                        |
| Refinement on $F^2$                                    | Primary atom site location: structure-invariant direct methods         |
| Least-squares matrix: full                             | Secondary atom site location: difference Fourier map                   |
| $R[F^2 > 2\sigma(F^2)] = 0.074$                        | Hydrogen site location: inferred from neighbouring sites               |
| $wR(F^2) = 0.199$                                      | H-atom parameters constrained                                          |
| $S = 1.18$                                             | $w = 1/[\sigma^2(F_o^2) + (0.0009P)^2 + 30.7076P]$                     |
|                                                        | where $P = (F_o^2 + 2F_c^2)/3$                                         |
| 6156 reflections                                       | $(\Delta/\sigma)_{\text{max}} = 0.001$                                 |
| 453 parameters                                         | $\Delta_{\text{max}} = 2.06 \text{ e \AA}^{-3}$                        |
| 312 restraints                                         | $\Delta_{\text{min}} = -0.94 \text{ e \AA}^{-3}$                       |

**Table S7.** Crystal data and structure refinement for 3,3'-syn-**16b**.

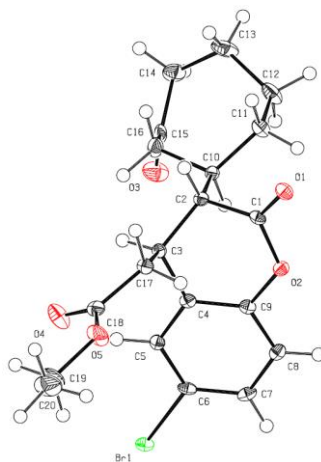

|                                          |                                                         |
|------------------------------------------|---------------------------------------------------------|
| $\text{C}_{20}\text{H}_{23}\text{BrO}_5$ | $F(000) = 872$                                          |
| $M_r = 423.29$                           | $D_x = 1.481 \text{ Mg m}^{-3}$                         |
| Monoclinic, $P2_1/n$                     | Mo $K\alpha$ radiation, $\lambda = 0.71073 \text{ \AA}$ |
| Hall symbol: $-P 2_1 n$                  | Cell parameters from 5070 reflections                   |
| $a = 12.0177 (12) \text{ \AA}$           | $\theta = 3.0\text{--}27.6^\circ$                       |
| $b = 6.6196 (6) \text{ \AA}$             | $\mu = 2.19 \text{ mm}^{-1}$                            |
| $c = 23.898 (2) \text{ \AA}$             | $T = 90 \text{ K}$                                      |
| $\beta = 93.302 (1)^\circ$               | Block, colourless                                       |

|                                                        |                                                                        |
|--------------------------------------------------------|------------------------------------------------------------------------|
| $V = 1898.0 (3) \text{ \AA}^3$                         | $0.22 \times 0.12 \times 0.06 \text{ mm}$                              |
| $Z = 4$                                                |                                                                        |
| Bruker APEXII CCD area detector<br>diffractometer      | 3352 independent reflections                                           |
| Radiation source: Bruker TXS fine-focus rotating anode | 3025 reflections with $I > 2\sigma(I)$                                 |
| Bruker Helios multilayer confocal mirror               | $R_{\text{int}} = 0.021$                                               |
| Detector resolution: $8.333 \text{ pixels mm}^{-1}$    | $\theta_{\text{max}} = 25.0^\circ$ , $\theta_{\text{min}} = 1.7^\circ$ |
| $\phi$ and $\omega$ scans                              | $h = -14 \rightarrow 14$                                               |
| Absorption correction: analytical                      | $k = -7 \rightarrow 7$                                                 |
| Crystal Faces plugin in Bruker APEX2 software          |                                                                        |
| $T_{\text{min}} = 0.644$ , $T_{\text{max}} = 0.880$    | $l = -28 \rightarrow 15$                                               |
| 8856 measured reflections                              |                                                                        |
| Refinement on $F^2$                                    | Primary atom site location: structure-invariant direct methods         |
| Least-squares matrix: full                             | Secondary atom site location: difference Fourier map                   |
| $R[F^2 > 2\sigma(F^2)] = 0.023$                        | Hydrogen site location: inferred from neighbouring sites               |
| $wR(F^2) = 0.056$                                      | H-atom parameters constrained                                          |
| $S = 1.06$                                             | $w = 1/[\sigma^2(F_o^2) + (0.0261P)^2 + 1.0095P]$                      |
|                                                        | where $P = (F_o^2 + 2F_c^2)/3$                                         |
| 3352 reflections                                       | $(\Delta/\sigma)_{\text{max}} = 0.004$                                 |
| 236 parameters                                         | $\Delta_{\text{max}} = 0.33 \text{ e \AA}^{-3}$                        |
| 162 restraints                                         | $\Delta_{\text{min}} = -0.21 \text{ e \AA}^{-3}$                       |

**Table S8.** Crystal data and structure refinement for 3,3'-*anti*-**16b**.

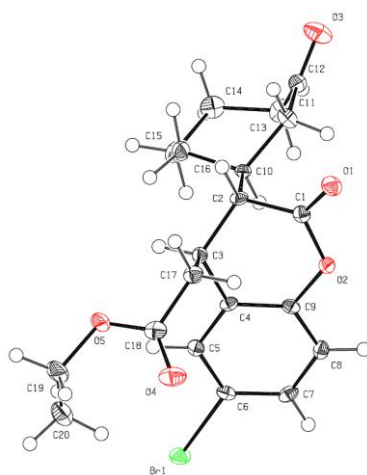

|                                          |                                                         |
|------------------------------------------|---------------------------------------------------------|
| $\text{C}_{20}\text{H}_{23}\text{BrO}_5$ | $F(000) = 872$                                          |
| $M_r = 423.29$                           | $D_x = 1.559 \text{ Mg m}^{-3}$                         |
| Monoclinic, $P2_1/c$                     | Mo $K\alpha$ radiation, $\lambda = 0.71073 \text{ \AA}$ |
| Hall symbol: $-P 2_1/c$                  | Cell parameters from 3254 reflections                   |
| $a = 7.1552 (8) \text{ \AA}$             | $\theta = 2.4\text{--}27.4^\circ$                       |
| $b = 17.356 (2) \text{ \AA}$             | $\mu = 2.31 \text{ mm}^{-1}$                            |

|                                                        |                                                                     |
|--------------------------------------------------------|---------------------------------------------------------------------|
| $c = 14.5825 (17) \text{ \AA}$                         | $T = 90 \text{ K}$                                                  |
| $\beta = 95.177 (2)^\circ$                             | Block, colourless                                                   |
| $V = 1803.5 (4) \text{ \AA}^3$                         | $0.13 \times 0.11 \times 0.11 \text{ mm}$                           |
| $Z = 4$                                                |                                                                     |
| Bruker APEXII CCD area detector diffractometer         | 3188 independent reflections                                        |
| Radiation source: Bruker TXS fine-focus rotating anode | 2741 reflections with $I > 2\sigma(I)$                              |
| Bruker Helios multilayer confocal mirror               | $R_{\text{int}} = 0.027$                                            |
| Detector resolution: $8.333 \text{ pixels mm}^{-1}$    | $\theta_{\text{max}} = 25.0^\circ, \theta_{\text{min}} = 1.8^\circ$ |
| phi and $\omega$ scans                                 | $h = -8 \rightarrow 4$                                              |
| Absorption correction: analytical                      | $k = -20 \rightarrow 20$                                            |
| Crystal Faces plugin in Bruker APEX2 software          |                                                                     |
| $T_{\text{min}} = 0.754, T_{\text{max}} = 0.785$       | $l = -17 \rightarrow 16$                                            |
| 8683 measured reflections                              |                                                                     |
| Refinement on $F^2$                                    | Primary atom site location: structure-invariant direct methods      |
| Least-squares matrix: full                             | Secondary atom site location: difference Fourier map                |
| $R[F^2 > 2\sigma(F^2)] = 0.029$                        | Hydrogen site location: inferred from neighbouring sites            |
| $wR(F^2) = 0.074$                                      | H-atom parameters constrained                                       |
| $S = 1.04$                                             | $w = 1/[\sigma^2(F_o^2) + (0.0403P)^2 + 0.4382P]$                   |
|                                                        | where $P = (F_o^2 + 2F_c^2)/3$                                      |
| 3188 reflections                                       | $(\Delta/\sigma)_{\text{max}} = 0.001$                              |
| 236 parameters                                         | $\Delta_{\text{max}} = 0.50 \text{ e \AA}^{-3}$                     |
| 162 restraints                                         | $\Delta_{\text{min}} = -0.37 \text{ e \AA}^{-3}$                    |

**Table S9.** Crystal data and structure refinement for 3,2'-*anti*-**17**.

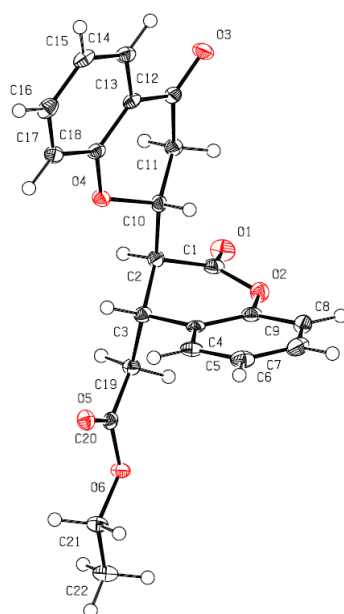

$\text{C}_{22}\text{H}_{20}\text{O}_6$

$F(000) = 1600$

$M_r = 380.38$

$D_x = 1.338 \text{ Mg m}^{-3}$

|                                                        |                                                                        |
|--------------------------------------------------------|------------------------------------------------------------------------|
| Orthorhombic, $Pca2_1$                                 | Mo $K\alpha$ radiation, $\lambda = 0.71073 \text{ \AA}$                |
| Hall symbol: $P\ 2c\ -2ac$                             | Cell parameters from 5244 reflections                                  |
| $a = 34.732\ (4) \text{ \AA}$                          | $\theta = 2.4\text{--}26.2^\circ$                                      |
| $b = 13.1317\ (14) \text{ \AA}$                        | $\mu = 0.10 \text{ mm}^{-1}$                                           |
| $c = 8.2791\ (9) \text{ \AA}$                          | $T = 90 \text{ K}$                                                     |
| $V = 3776.0\ (7) \text{ \AA}^3$                        | Block, colourless                                                      |
| $Z = 8$                                                | $0.18 \times 0.07 \times 0.05 \text{ mm}$                              |
| Bruker APEXII CCD area detector diffractometer         | 6383 independent reflections                                           |
| Radiation source: Bruker TXS fine-focus rotating anode | 5777 reflections with $I > 2\sigma(I)$                                 |
| Bruker Helios multilayer confocal mirror               | $R_{\text{int}} = 0.032$                                               |
| Detector resolution: $8.333 \text{ pixels mm}^{-1}$    | $\theta_{\text{max}} = 25.0^\circ$ , $\theta_{\text{min}} = 1.2^\circ$ |
| $\phi$ and $\omega$ scans                              | $h = -41 \rightarrow 39$                                               |
| Absorption correction: analytical                      | $k = -11 \rightarrow 15$                                               |
| Crystal Faces plugin in Bruker APEX2 software          |                                                                        |
| $T_{\text{min}} = 0.983$ , $T_{\text{max}} = 0.995$    | $l = -9 \rightarrow 9$                                                 |
| 17978 measured reflections                             |                                                                        |
| Refinement on $F^2$                                    | Secondary atom site location: difference Fourier map                   |
| Least-squares matrix: full                             | Hydrogen site location: inferred from neighbouring sites               |
| $R[F^2 > 2\sigma(F^2)] = 0.033$                        | H-atom parameters constrained                                          |
| $wR(F^2) = 0.075$                                      | $w = 1/[\sigma^2(F_o^2) + (0.0377P)^2 + 0.5188P]$                      |
|                                                        | where $P = (F_o^2 + 2F_c^2)/3$                                         |
| $S = 1.00$                                             | $(\Delta/\sigma)_{\text{max}} = 0.001$                                 |
| 6383 reflections                                       | $\Delta_{\text{max}} = 0.15 \text{ e \AA}^{-3}$                        |
| 507 parameters                                         | $\Delta_{\text{min}} = -0.16 \text{ e \AA}^{-3}$                       |

**Table S10.** Crystal data and structure refinement for 3,2'-*anti*-**18**.

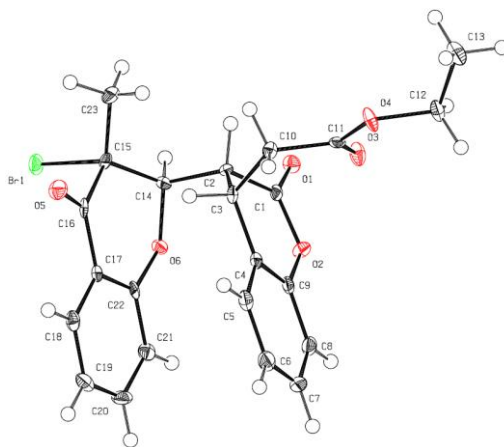

|                                          |                                                         |
|------------------------------------------|---------------------------------------------------------|
| $\text{C}_{23}\text{H}_{21}\text{BrO}_6$ | $F(000) = 968$                                          |
| $M_r = 473.31$                           | $D_x = 1.578 \text{ Mg m}^{-3}$                         |
| Monoclinic, $P2_1/n$                     | Mo $K\alpha$ radiation, $\lambda = 0.71073 \text{ \AA}$ |
| Hall symbol: $-P\ 2_1n$                  | Cell parameters from 2685 reflections                   |



|                                                        |                                                                        |
|--------------------------------------------------------|------------------------------------------------------------------------|
| $a = 12.6704\ (12)\ \text{\AA}$                        | $\theta = 2.5\text{--}26.5^\circ$                                      |
| $b = 9.7676\ (9)\ \text{\AA}$                          | $\mu = 2.10\ \text{mm}^{-1}$                                           |
| $c = 16.2166\ (16)\ \text{\AA}$                        | $T = 90\ \text{K}$                                                     |
| $\beta = 97.059\ (1)^\circ$                            | Block, colourless                                                      |
| $V = 1991.7\ (3)\ \text{\AA}^3$                        | $0.11 \times 0.09 \times 0.04\ \text{mm}$                              |
| $Z = 4$                                                |                                                                        |
| Bruker APEXII CCD area detector diffractometer         | 3501 independent reflections                                           |
| Radiation source: Bruker TXS fine-focus rotating anode | 2887 reflections with $I > 2\sigma(I)$                                 |
| Bruker Helios multilayer confocal mirror               | $R_{\text{int}} = 0.033$                                               |
| Detector resolution: $8.333\ \text{pixels mm}^{-1}$    | $\theta_{\text{max}} = 25.0^\circ$ , $\theta_{\text{min}} = 1.9^\circ$ |
| phi and $\omega$ scans                                 | $h = -15 \rightarrow 14$                                               |
| Absorption correction: analytical                      | $k = -11 \rightarrow 11$                                               |
| Crystal Faces plugin in Bruker APEX2 software          |                                                                        |
| $T_{\text{min}} = 0.802$ , $T_{\text{max}} = 0.921$    | $l = -14 \rightarrow 19$                                               |
| 9184 measured reflections                              |                                                                        |
| Refinement on $F^2$                                    | Primary atom site location: structure-invariant direct methods         |
| Least-squares matrix: full                             | Secondary atom site location: difference Fourier map                   |
| $R[F^2 > 2\sigma(F^2)] = 0.029$                        | Hydrogen site location: inferred from neighbouring sites               |
| $wR(F^2) = 0.063$                                      | H-atom parameters constrained                                          |
| $S = 1.01$                                             | $w = 1/[\sigma^2(F_o^2) + (0.0271P)^2 + 0.658P]$                       |
|                                                        | where $P = (F_o^2 + 2F_c^2)/3$                                         |
| 3501 reflections                                       | $(\Delta/\sigma)_{\text{max}} = 0.001$                                 |
| 273 parameters                                         | $\Delta_{\text{max}} = 0.39\ \text{e \AA}^{-3}$                        |
| 192 restraints                                         | $\Delta_{\text{min}} = -0.32\ \text{e \AA}^{-3}$                       |

## 7. <sup>1</sup>H and <sup>13</sup>C NMR spectra

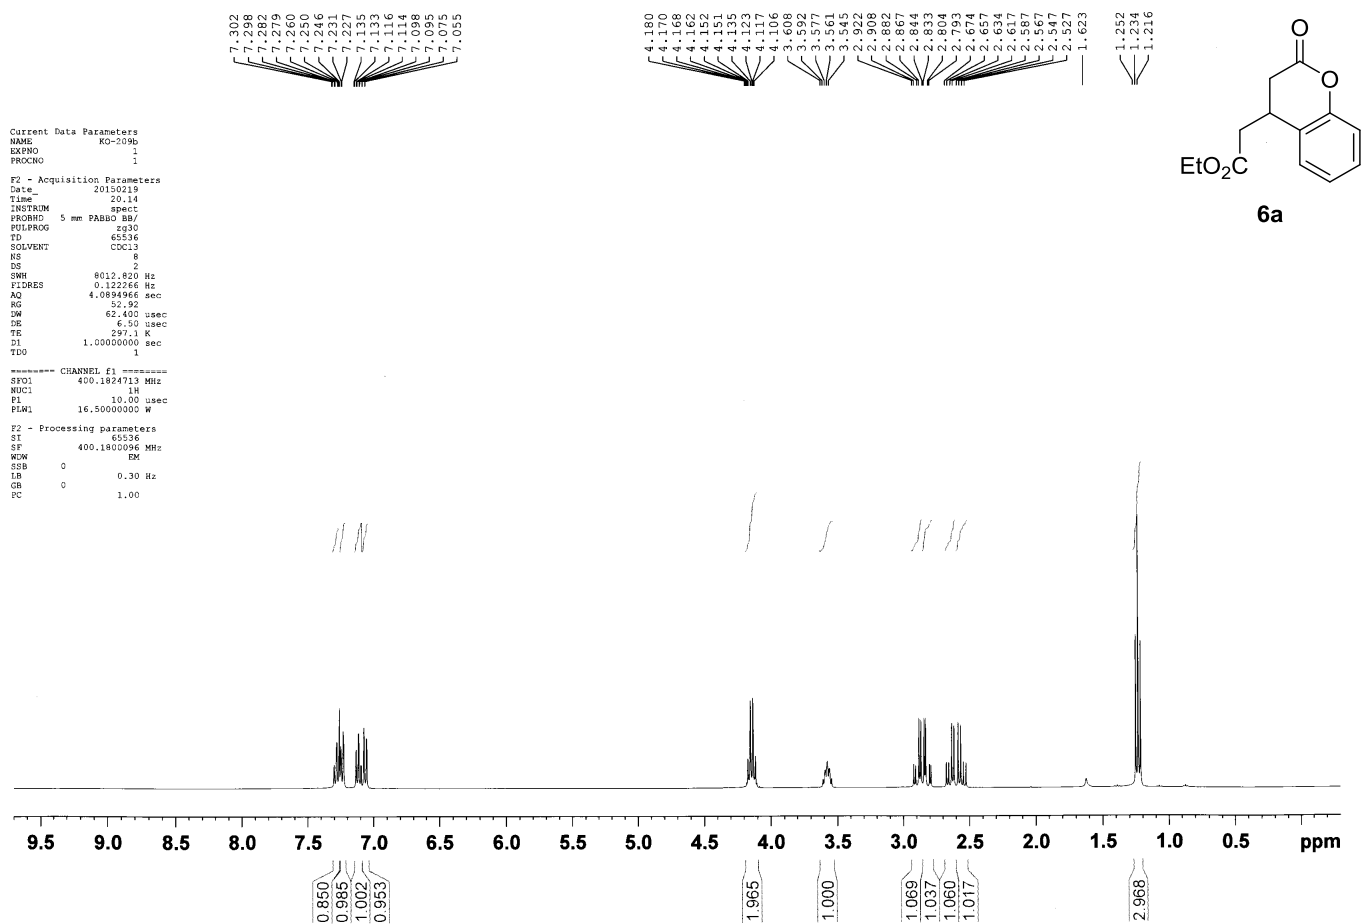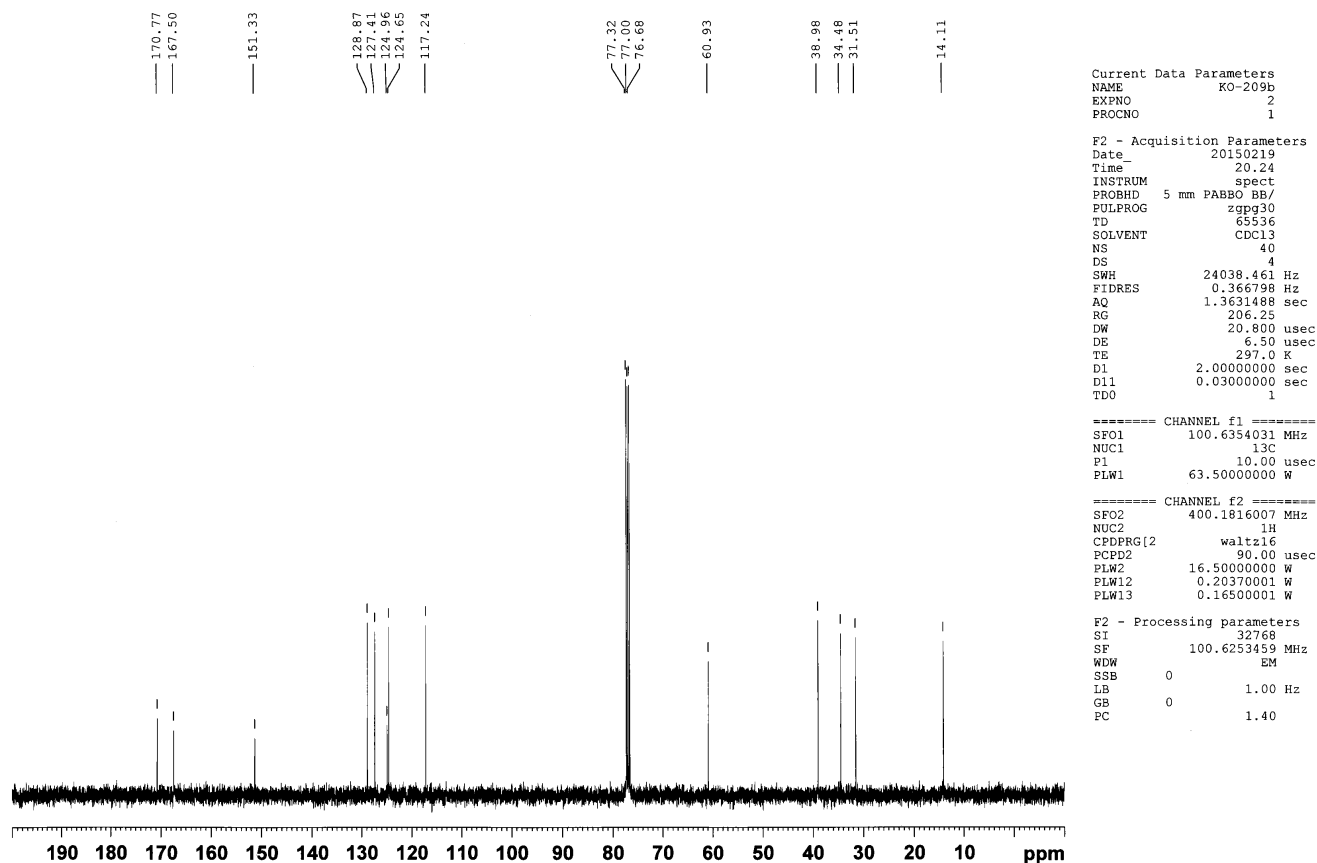

Current Data Parameters  
NAME KO-62a-1  
EXPNO 1  
PROCNO 1

F2 - Acquisition Parameters  
Date 20140212  
Time 15.02  
INSTRUM spect  
PROBHD 5 mm PABBO BB/  
PULPROG zg30  
TD 65536  
SOLVENT CDCl3  
NS 7  
DS 2  
SWH 8223.685 Hz  
FIDRES 0.125483 Hz  
AQ 3.9846387 sec  
RG 55.5  
DM 60.800 usec  
DE 6.50 usec  
TE 293.6 K  
D1 1.00000000 sec  
D11 1  
TDO 1

===== CHANNEL f1 =====  
NUC1 1H  
P1 10.00 usec  
PLW1 16.00000000 W  
SFO1 400.1324710 MHz

F2 - Processing parameters  
SI 65536  
SF 400.1300094 MHz  
WDW EM  
SSB 0  
LB 0.30 Hz  
GB 0  
PC 1.00

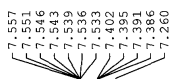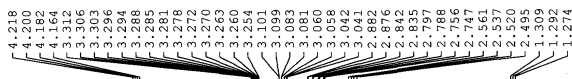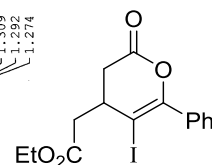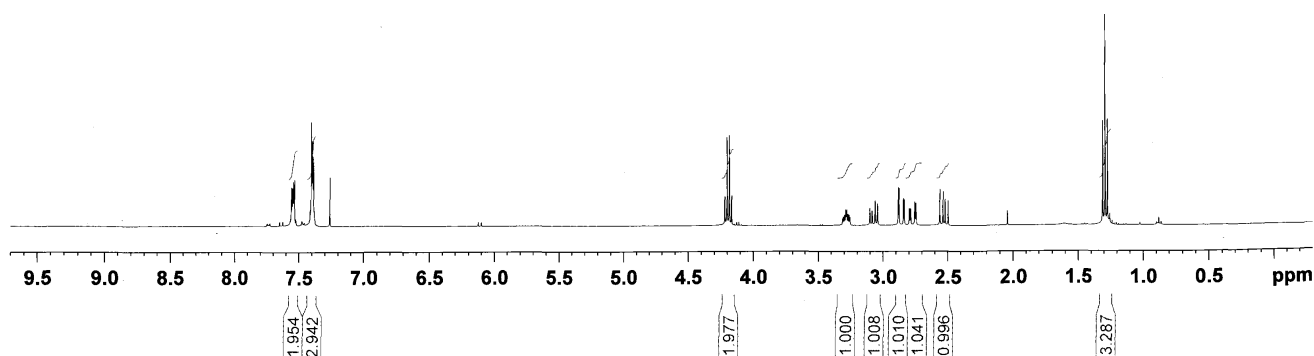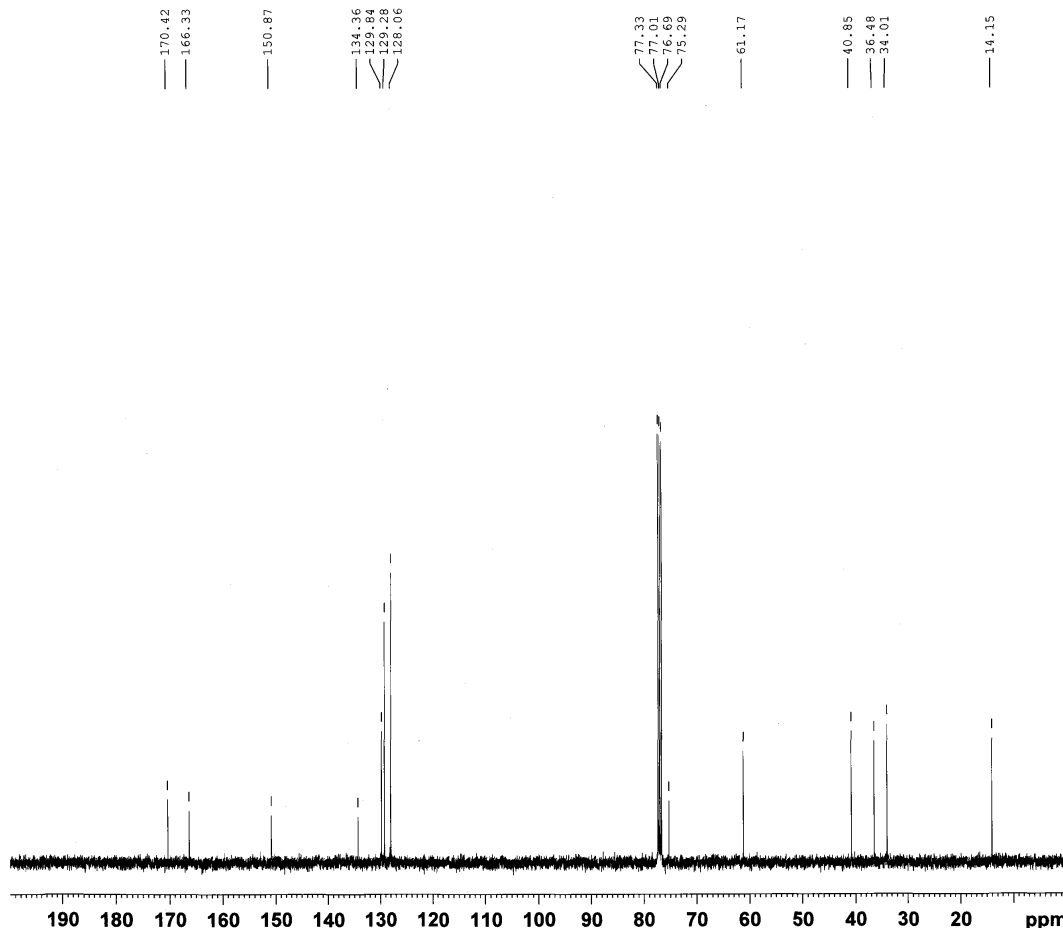

Current Data Parameters  
NAME KO-62a-1  
EXPNO 3  
PROCNO 1

F2 - Acquisition Parameters  
Date 20140212  
Time 15.09  
INSTRUM spect  
PROBHD 5 mm PABBO BB/  
PULPROG zgpg30  
TD 65536  
SOLVENT CDCl3  
NS 80  
DS 4  
SWH 24038.461 Hz  
FIDRES 0.366798 Hz  
AQ 1.3631988 sec  
RG 204.44  
DM 20.800 usec  
DE 6.50 usec  
TE 294.1 K  
D1 2.00000000 sec  
D11 0.03000000 sec  
TDO 1

===== CHANNEL f1 =====  
NUC1 13C  
P1 10.00 usec  
PLW1 78.00000000 W  
SFO1 100.6228293 MHz

===== CHANNEL f2 =====  
CPDPRG2 waltz16  
NUC2 1H  
PCPD2 90.00 usec  
PLW2 16.00000000 W  
PLW12 0.19753000 W  
PLW13 0.16000000 W  
SFO2 400.1316005 MHz

F2 - Processing parameters  
SI 32768  
SF 100.6127729 MHz  
WDW EM  
SSB 0  
LB 1.00 Hz  
GB 0  
PC 1.40

Current Data Parameters  
NAME KO-49  
EXPNO 2  
PROCNO 1

F2 - Acquisition Parameters  
Date\_ 20150121  
Time\_ 20.18  
INSTRUM spect  
PROBHD 5 mm PABBO BB/  
PULPROG zg30  
TD 65536  
SOLVENT CDCl3  
NS 16  
DS 2  
SWH 8012.820 Hz  
FIDRES 0.122266 Hz  
AQ 4.0894966 sec  
RG 46.13  
RW 62.400 usec  
DE 6.50 usec  
TE 296.1 K  
D1 1.0000000 sec  
TDO 1

===== CHANNEL f1 =====  
SFO1 400.1824713 MHz  
NUC1 1H  
P1 16.00 usec  
PLW1 16.50000000 W

F2 - Processing parameters  
SI 65536  
SF 400.180097 MHz  
WDW EM  
SSB 0  
LB 0.30 Hz  
GB 0  
PC 1.00

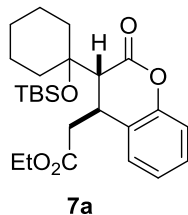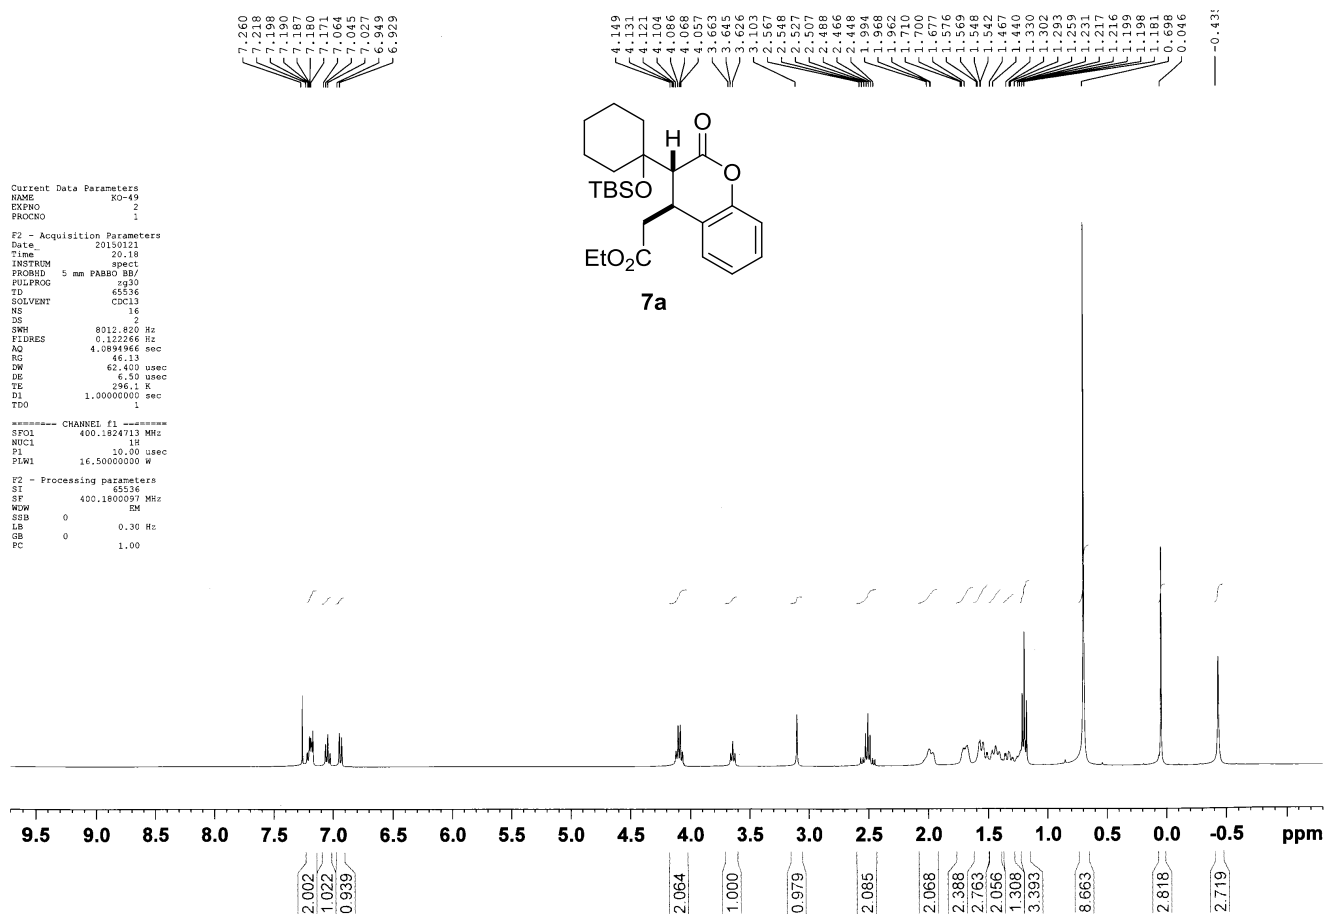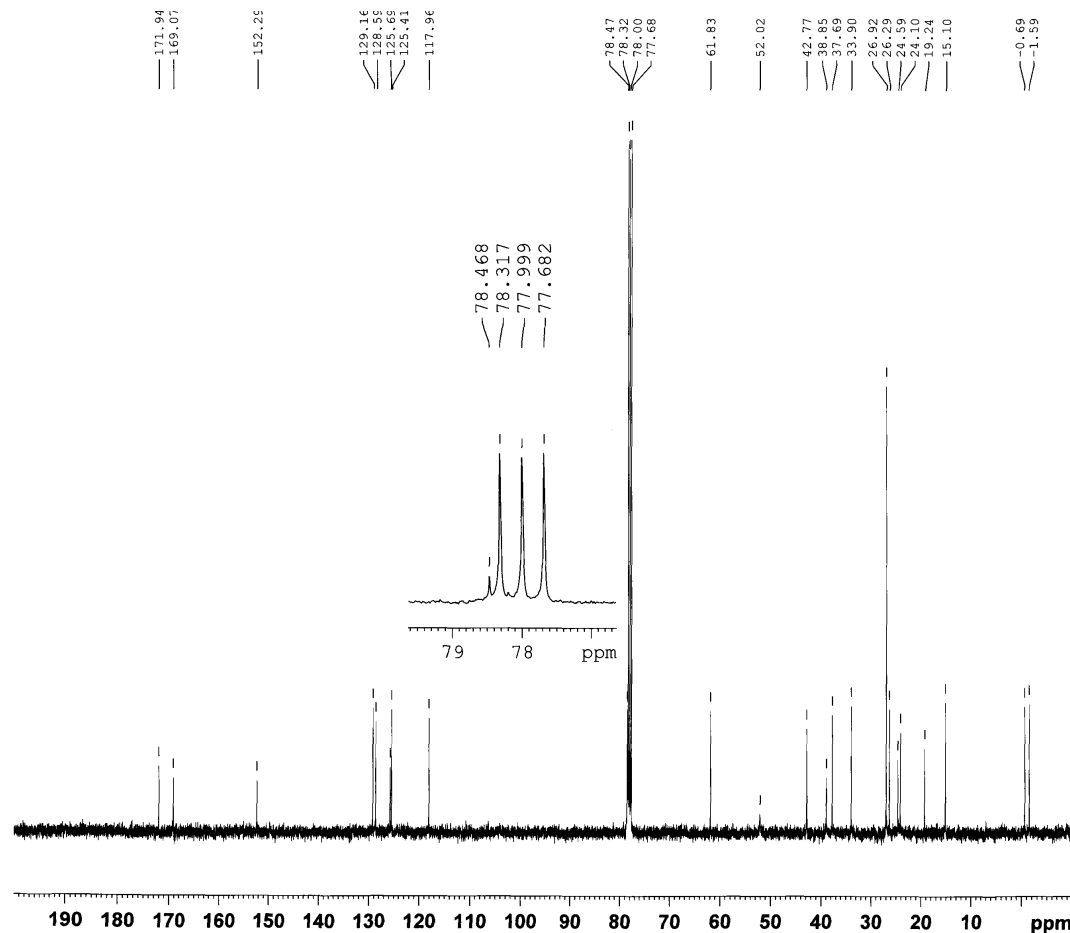

Current Data Parameters  
NAME KO-49  
EXPNO 3  
PROCNO 1

F2 - Acquisition Parameters  
Date\_ 20150121  
Time\_ 20.23  
INSTRUM spect  
PROBHD 5 mm PABBO BB/  
PULPROG zgpg30  
TD 65536  
SOLVENT CDCl3  
NS 248  
DS 4  
SWH 24038.461 Hz  
FIDRES 0.366798 Hz  
AQ 1.3631988 sec  
RG 206.25  
DW 20.800 usec  
DE 6.50 usec  
TE 296.4 K  
D1 2.00000000 sec  
d11 0.03000000 sec  
DELTA 1.89999998 sec  
TDO 1  
NUC1 13C  
P1 10.00 usec  
PLW1 63.50000000 W  
SFO1 100.6354031 MHz  
CPDPRG2  
NUC2 1H  
PLW2 16.50000000 W  
PLW12 0.20370001 W  
PLW13 0.16500001 W  
SFO2 400.1816007 MHz

F2 - Processing parameters  
SI 32768  
SF 100.6252436 MHz  
WDW EM  
SSB 0  
LB 1.00 Hz  
GB 0  
PC 1.40

Current Data Parameters  
 NAME KO-51a  
 EXPNO 8  
 PROCNO 1

F2 - Acquisition Parameters  
 Date 20150212  
 Time 12.19  
 INSTRUM spect  
 PROBHD 5 mm PABBO BB/  
 PULPROG zgpg30  
 TD 65536  
 SOLVENT CDCl3  
 NS 16  
 DS 2  
 SWH 8012.620 Hz  
 FIDRES 0.122266 Hz  
 AQ 4.0894966 sec  
 RG 46.13  
 DW 62.400 usec  
 DE 6.50 usec  
 TE 297.0 K  
 D1 1.0000000 sec  
 TDO

===== CHANNEL f1 =====  
 SFO1 400.1824713 MHz  
 NUC1 1H  
 P1 10.00 usec  
 PLW1 16.50000000 W

F2 - Processing parameters  
 SI 65536  
 SF 400.1800599 MHz  
 WDW EM  
 SSB 0  
 LB 0.30 Hz  
 GB 0  
 PC 1.00

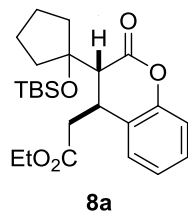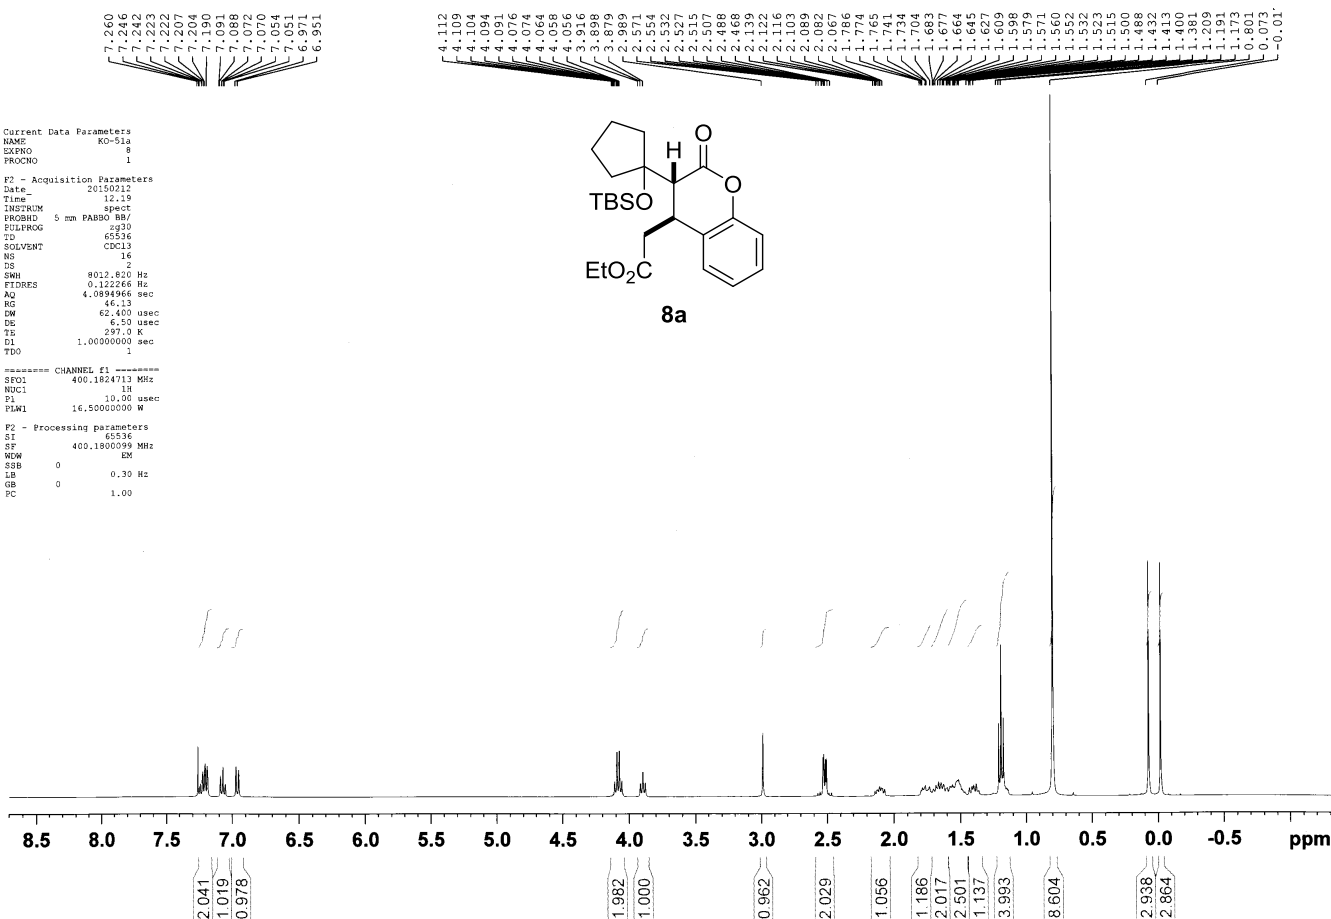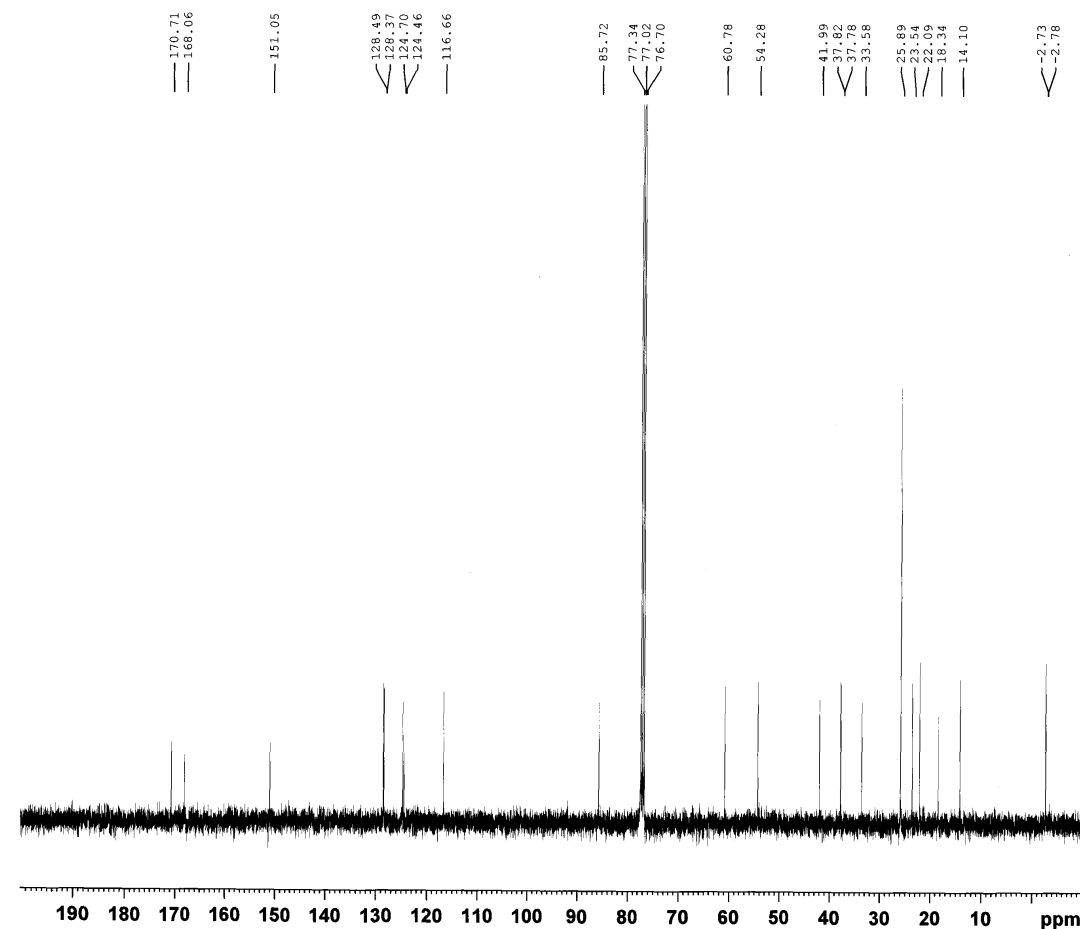

Current Data Parameters  
 NAME KO-51  
 EXPNO 2  
 PROCNO 1

F2 - Acquisition Parameters  
 Date 20150212  
 Time 12.23  
 INSTRUM spect  
 PROBHD 5 mm PABBO BB/  
 PULPROG zgpg30  
 TD 65536  
 SOLVENT CDCl3  
 NS 65  
 DS 4  
 SWH 24038.461 Hz  
 FIDRES 0.366798 Hz  
 AQ 1.3631488 sec  
 RG 206.25  
 DW 20.800 usec  
 DE 6.50 usec  
 TE 297.4 K  
 D1 2.00000000 sec  
 D11 0.03000000 sec  
 TDO 1

===== CHANNEL f1 =====  
 SFO1 100.6354031 MHz  
 NUC1 13C  
 P1 10.00 usec  
 PLW1 63.50000000 W

===== CHANNEL f2 =====  
 SFO2 400.1816007 MHz  
 NUC2 1H  
 CPDPRG2 waltz16  
 PCPD2 90.00 usec  
 PLW2 16.50000000 W  
 PLW12 0.20370001 W  
 PLW13 0.16500001 W

F2 - Processing parameters  
 SI 32768  
 SF 100.6253420 MHz  
 WDW EM  
 SSB 0  
 LB 1.00 Hz  
 GB 0  
 PC 1.40

Current Data Parameters  
NAME KO-57  
EXPNO 1  
PROCNO 1

F2 - Acquisition Parameters  
Date 20140212  
Time 18.52  
INSTRUM spect  
PROBHD 5 mm PABBO BB/  
PULPROG zg30  
TD 65536  
SOLVENT CDCl3  
NS 2  
DS 8  
SWH 8223.685 Hz  
FIDRES 0.125483 Hz  
AQ 3.9846397 sec  
RG 33.06  
DW 60.800 usec  
DE 6.50 usec  
TE 293.7 K  
D1 1.00000000 sec  
D11 1  
TD0 1

===== CHANNEL f1 =====  
NUC1 1H  
P1 10.00 usec  
PLW1 16.00000000 W  
SF01 400.1324110 MHz

F2 - Processing parameters  
SI 65536  
SF 400.1300098 MHz  
WDW EM  
SSB 0  
LB 0.30 Hz  
GB 0  
PC 1.00

7.359  
7.334  
7.320  
7.230  
7.214  
7.211  
7.202  
7.197  
7.191  
7.185  
7.179  
7.087  
7.084  
7.069  
7.066  
7.050  
7.047  
7.041  
6.968  
6.950

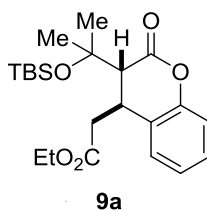

4.115  
4.098  
4.080  
4.062  
3.868  
3.850  
3.832

2.800  
2.799  
2.576  
2.558  
2.551  
2.519  
2.502  
2.480  
2.462

1.401  
1.213  
1.197  
1.177  
1.114

0.767  
0.021  
-0.143

2.252  
1.012  
0.982  
1.999  
1.008  
0.991  
2.017  
2.964  
3.117  
2.972  
8.912  
3.000  
2.999

170.80  
167.71

151.11

128.31  
128.01  
124.61  
124.41  
116.71

77.33  
77.01  
76.69  
74.92

60.78  
57.09

41.96

33.36  
29.80  
28.41  
25.74

18.02  
14.10

-2.22  
-2.49

Current Data Parameters  
NAME KO-57  
EXPNO 2  
PROCNO 1

F2 - Acquisition Parameters  
Date 20140212  
Time 18.58  
INSTRUM spect  
PROBHD 5 mm PABBO BB/  
PULPROG zgpg30  
TD 65536  
SOLVENT CDCl3  
NS 4  
DS 8  
SWH 24038.461 Hz  
FIDRES 0.366798 Hz  
AQ 1.3631988 sec  
RG 204.44  
DW 20.800 usec  
DE 6.50 usec  
TE 294.1 K  
D1 2.00000000 sec  
D11 0.03000000 sec  
TD0 1

===== CHANNEL f1 =====  
NUC1 13C  
P1 10.00 usec  
PLW1 78.00000000 W  
SF01 100.6228293 MHz

===== CHANNEL f2 =====  
CPDPRG2 waltz16  
NUC2 1H  
PCPD2 90.00 usec  
PLW2 16.00000000 W  
PLW12 0.19753000 W  
PLW13 0.16000000 W  
SF02 400.1316005 MHz

F2 - Processing parameters  
SI 32768  
SF 100.6127714 MHz  
WDW EM  
SSB 0  
LB 1.00 Hz  
GB 0  
PC 1.40

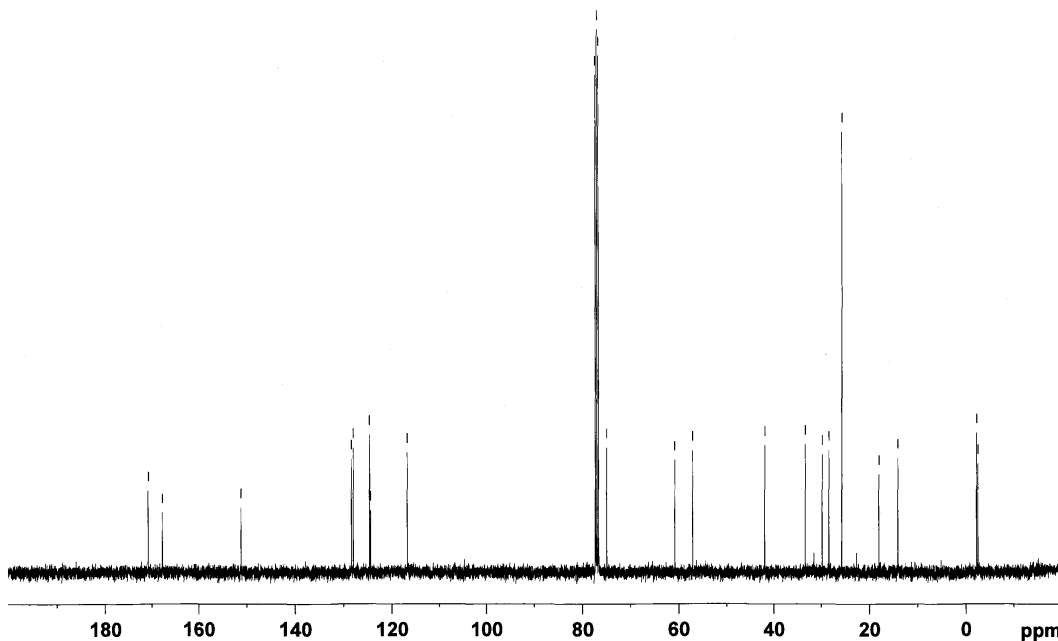

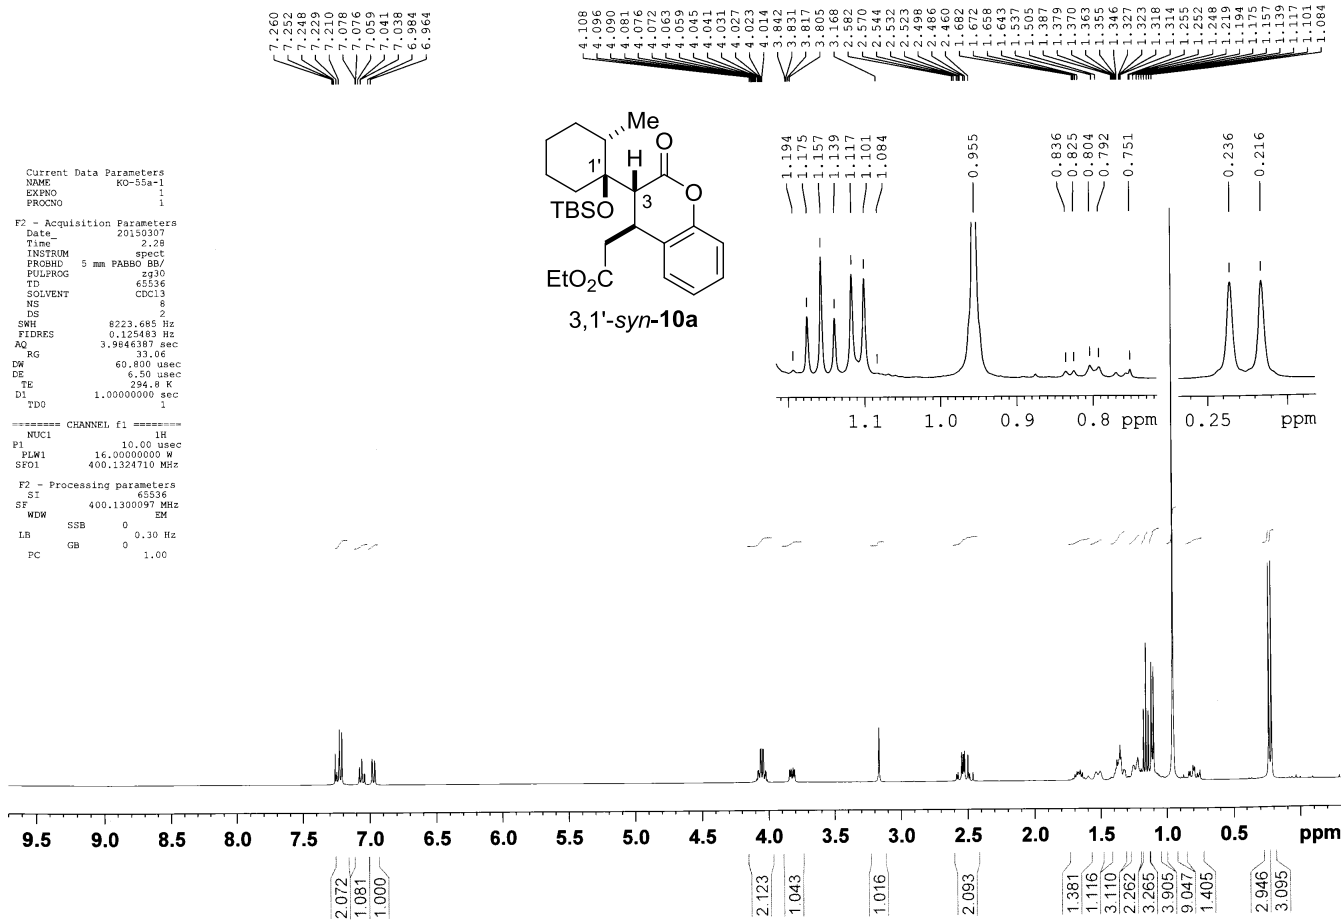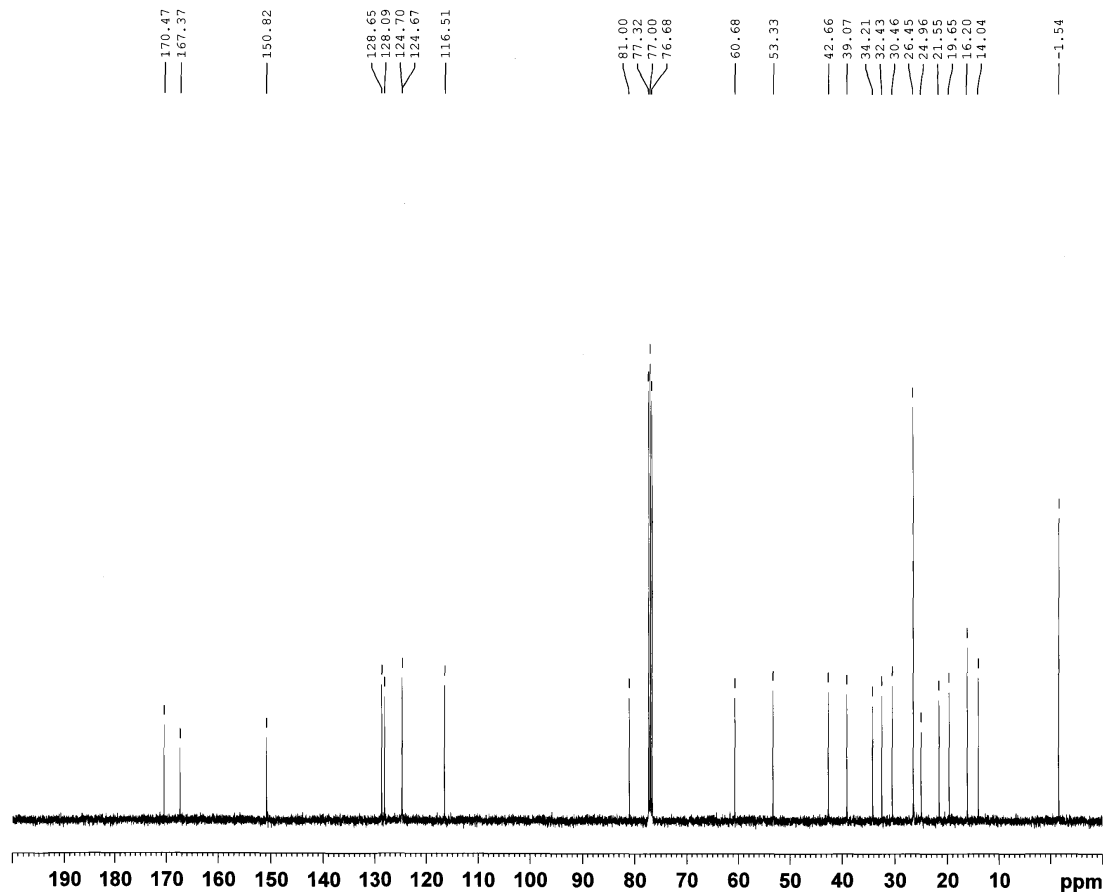

Current Data Parameters  
NAME KO-55a-1  
EXPNO 2  
PROCNO 1

F2 - Acquisition Parameters  
Date\_ 20150307  
Time 2.37  
INSTRUM spect  
PROBHD 5 mm PABBO BB/  
PULPROG zgpg30  
TD 65536  
SOLVENT CDC13  
NS 148  
DS 4  
SWH 24038.461 Hz  
FIDRES 0.366798 Hz  
AQ 1.3631988 sec  
RG 204.44  
DW 20.800 usec  
DE 6.50 usec  
TE 295.4 K  
D1 2.00000000 sec  
D11 0.03000000 sec  
TDO 1

===== CHANNEL f1 =====  
NUC1 13C  
P1 10.00 usec  
PLW1 78.00000000 W  
SFO1 100.6228293 MHz

===== CHANNEL f2 =====  
CPDPRG2 waltz16  
NUC2 1H  
PCPD2 90.00 usec  
PLW2 16.00000000 W  
PLW12 0.19753000 W  
PLW13 0.16000000 W  
SFO2 400.1316005 MHz

F2 - Processing parameters  
SI 32768  
SF 100.6127724 MHz  
WDW EM  
SSB 0  
LB 1.00 Hz  
GB 0  
PC 1.40

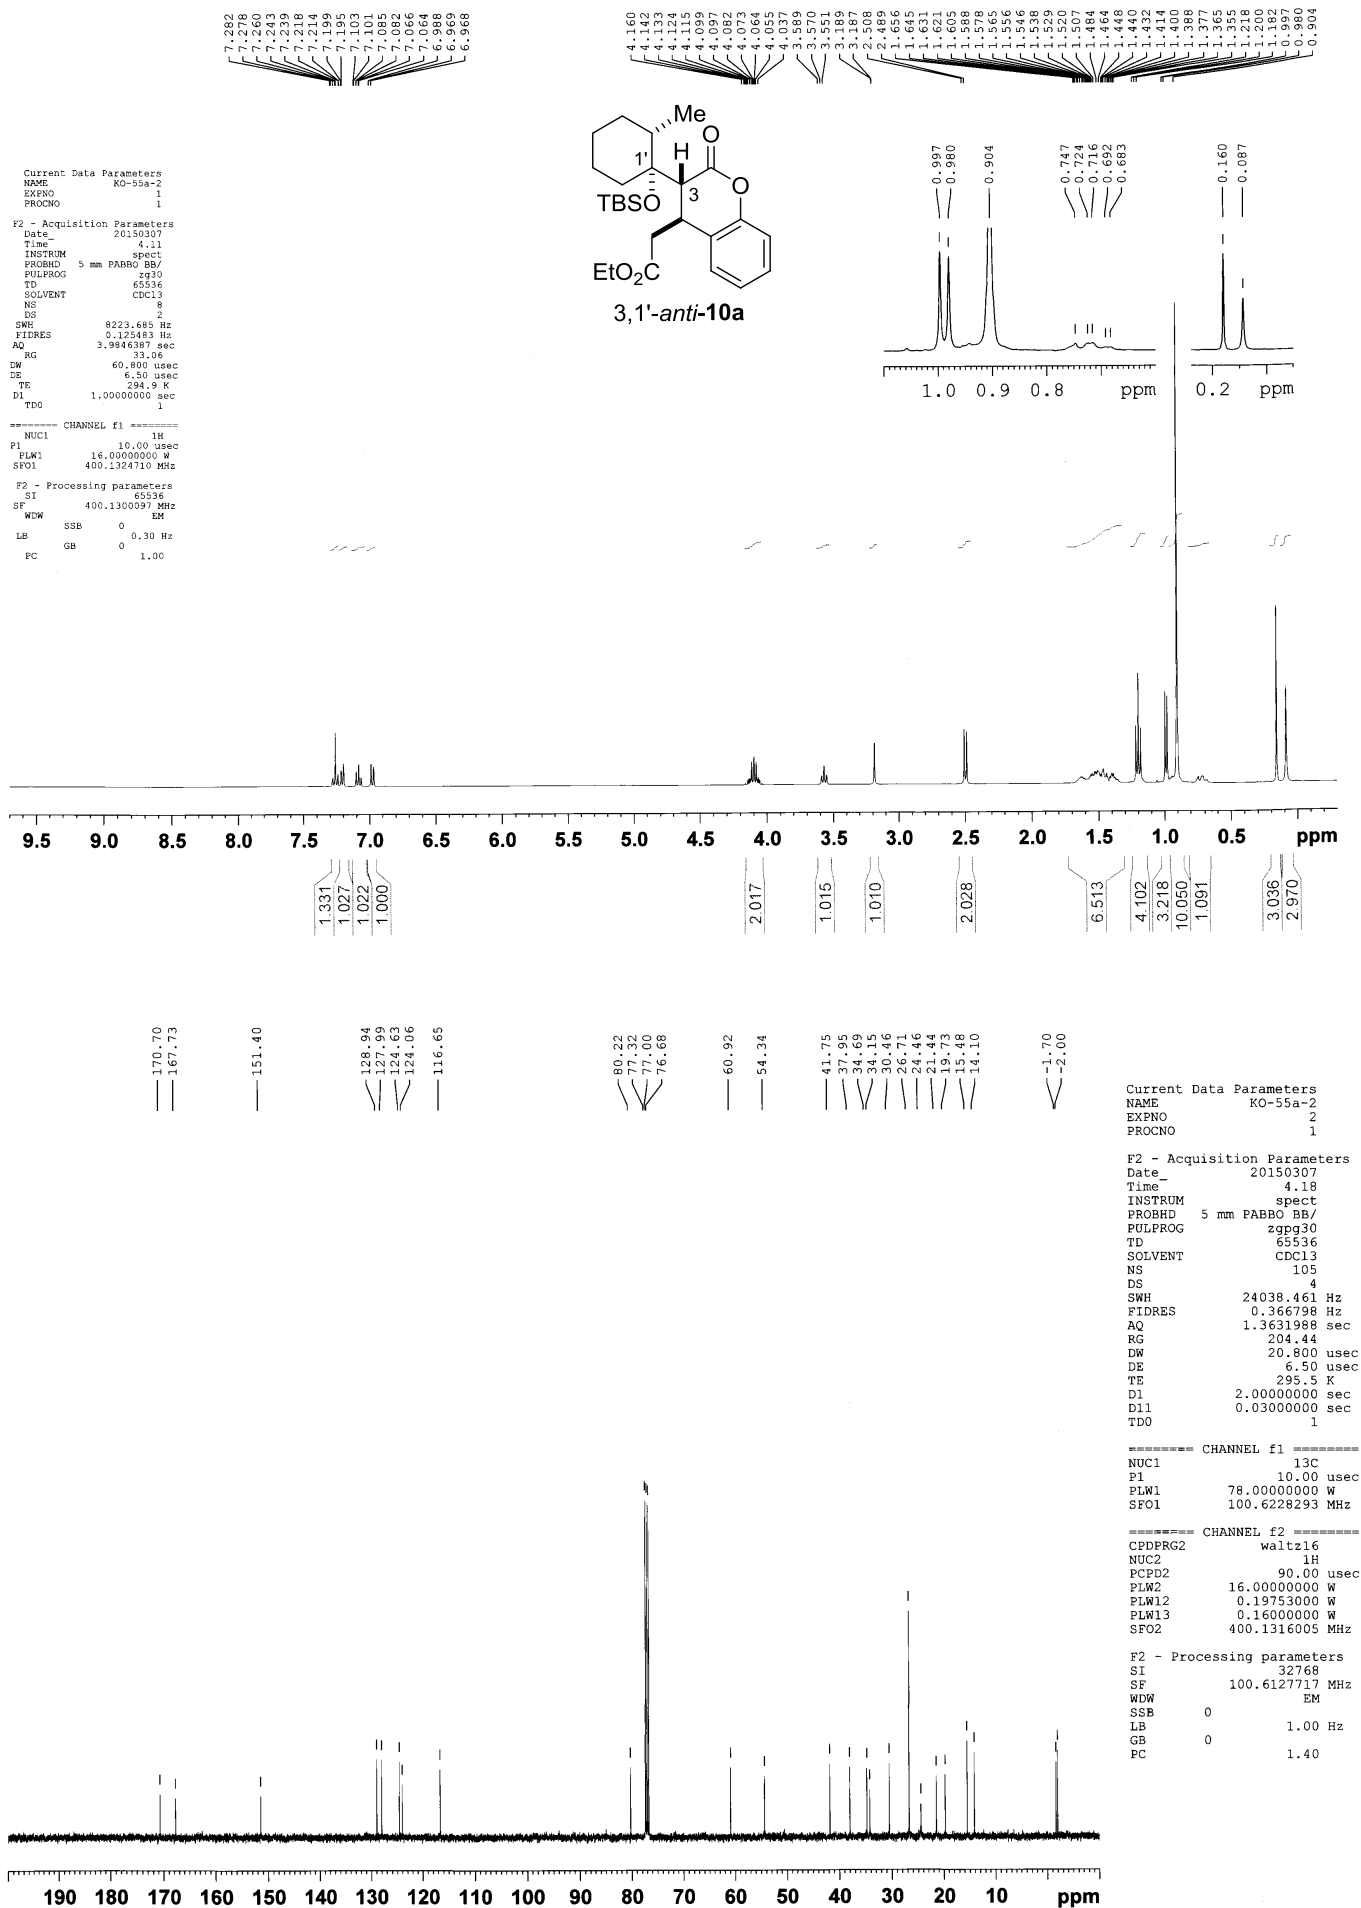



```

===== CHANNEL f1 =====
NUC1                      1H
P1                          10.00 usec
FLW1                      16.00000000 W
SFO1                      400.1324710 MHz

F2 - Processing parameters
SI                          65536
SF                      400.130097 MHz
WDW                      EM
SSB                      0
LB                          0.30 Hz
GB                      0
PC                          1.00

```

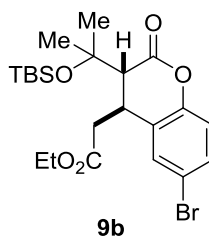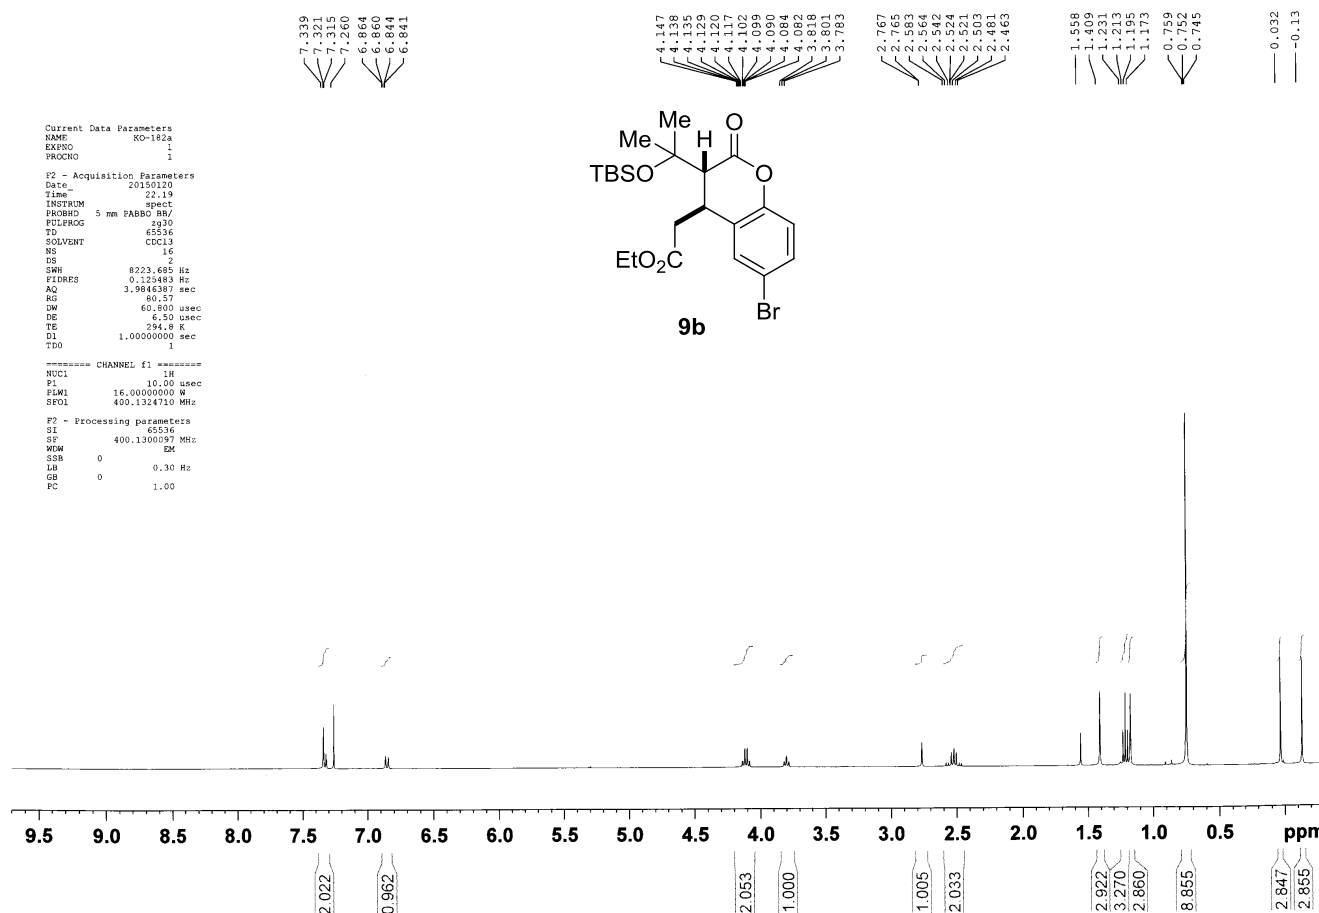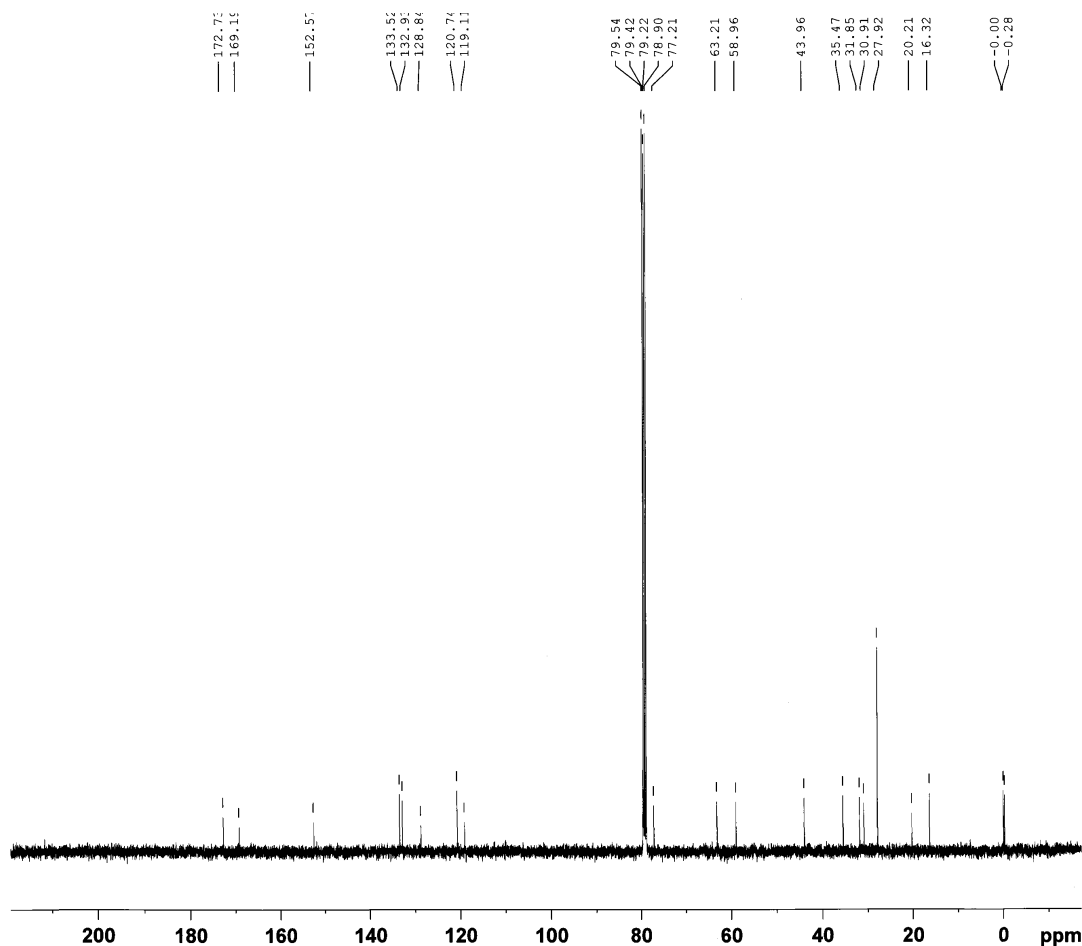

```

Current Data Parameters
NAME          KO-182a
EXPNO         2
PROCNO        1

F2 - Acquisition Parameters
Date_         20150120
Time          22.34
INSTRUM       spect
PROBHD        5 mm PABBO BB/
PULPROG       zgpg30
TD            65536
SOLVENT       CDCl3
DS            254
SFS           4
SWH           24038.461 Hz
FIDRES        0.366798 Hz
AQ            1.3631988 sec
RG            204.44
DW            20.800 usec
DE            6.50 usec
TE            295.2 K
D1            2.00000000 sec
D11           0.03000000 sec
TD0           1

===== CHANNEL f1 =====
NUC1           13C
P1            10.00 usec
PLW1          78.00000000 W
SFO1          100.6228293 MHz

===== CHANNEL f2 =====
CPDPRG2       waltz16
NUC2           1H
PCPD2         90.00 usec
PLW2          16.00000000 W
PLW12         0.19753000 W
PLW13         0.16000000 W
SFO2          400.1316005 MHz

F2 - Processing parameters
SI            32768
SF            100.6125479 MHz
WDW           EM
SSB           0
GB            0
PC            1.40

```

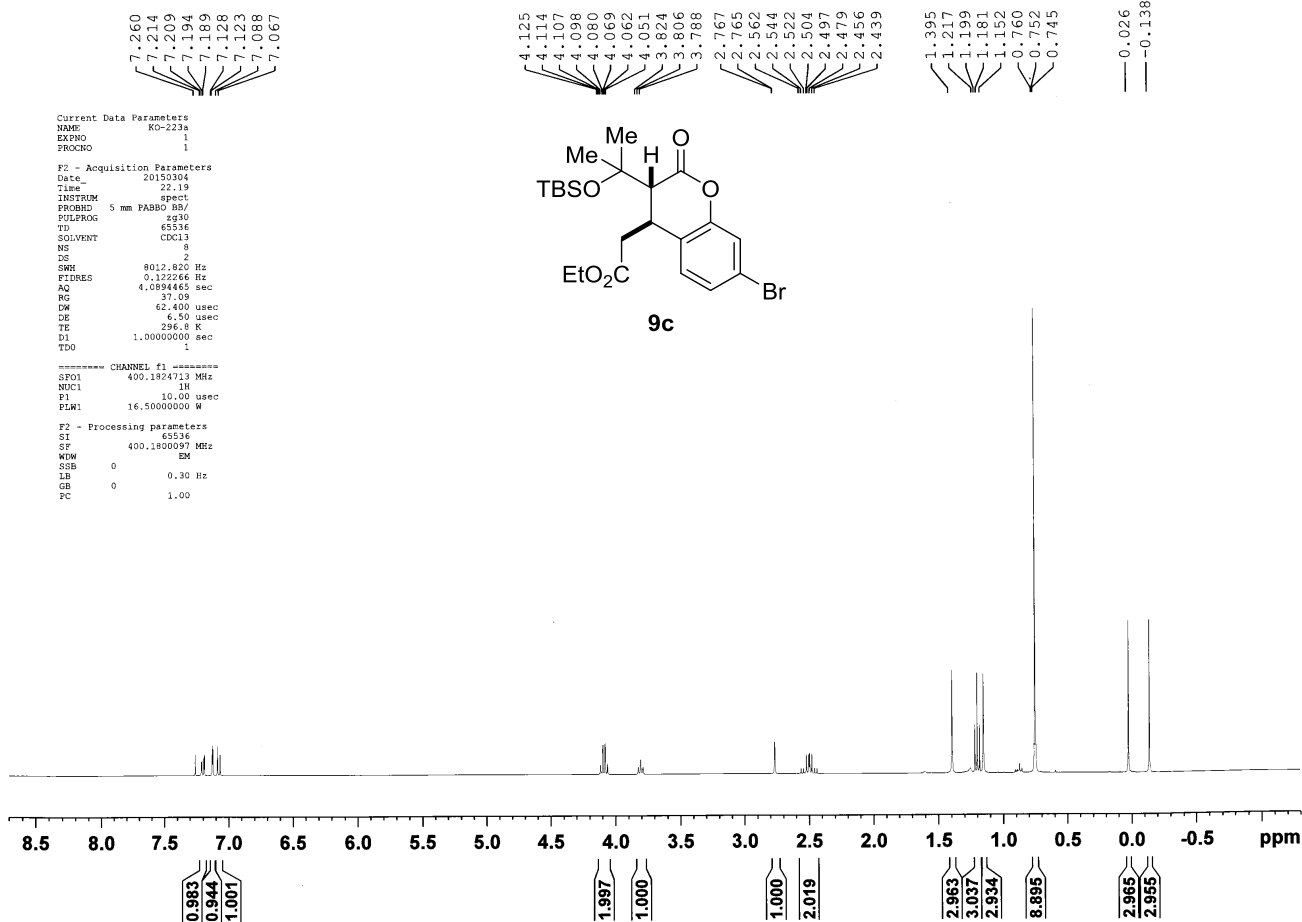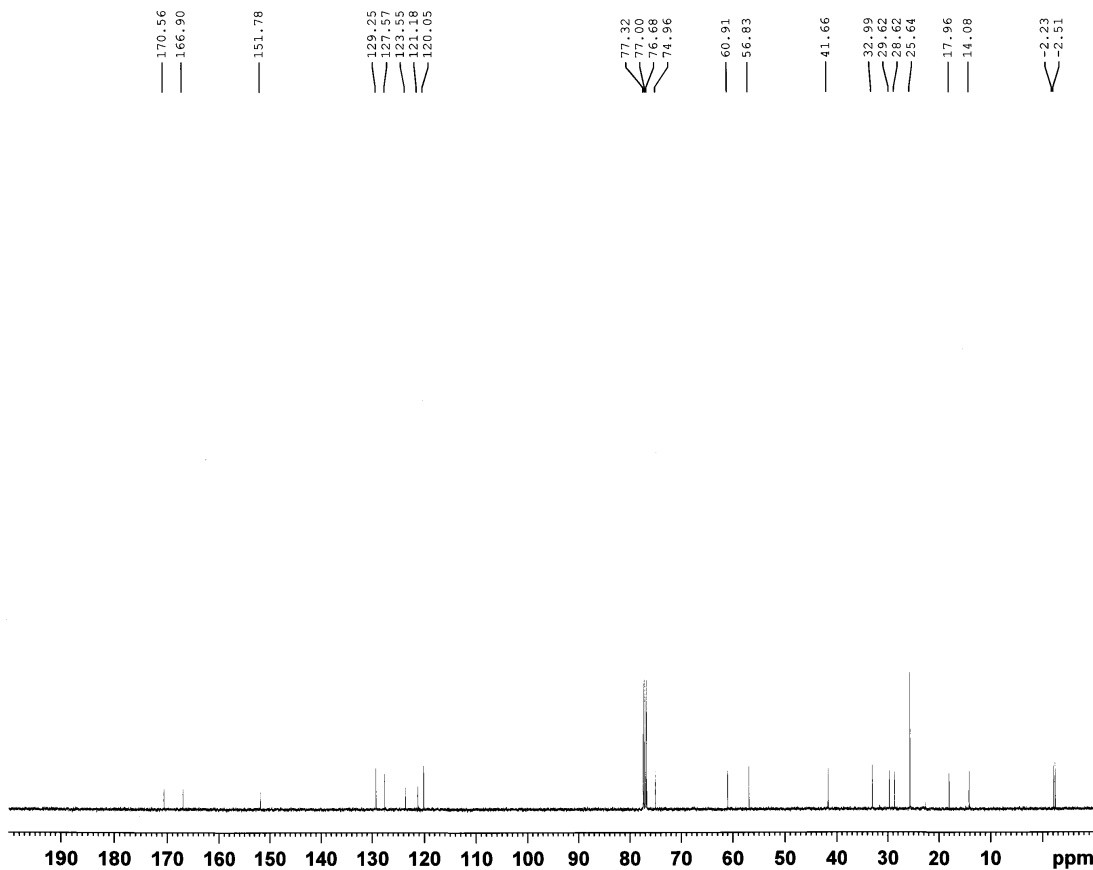

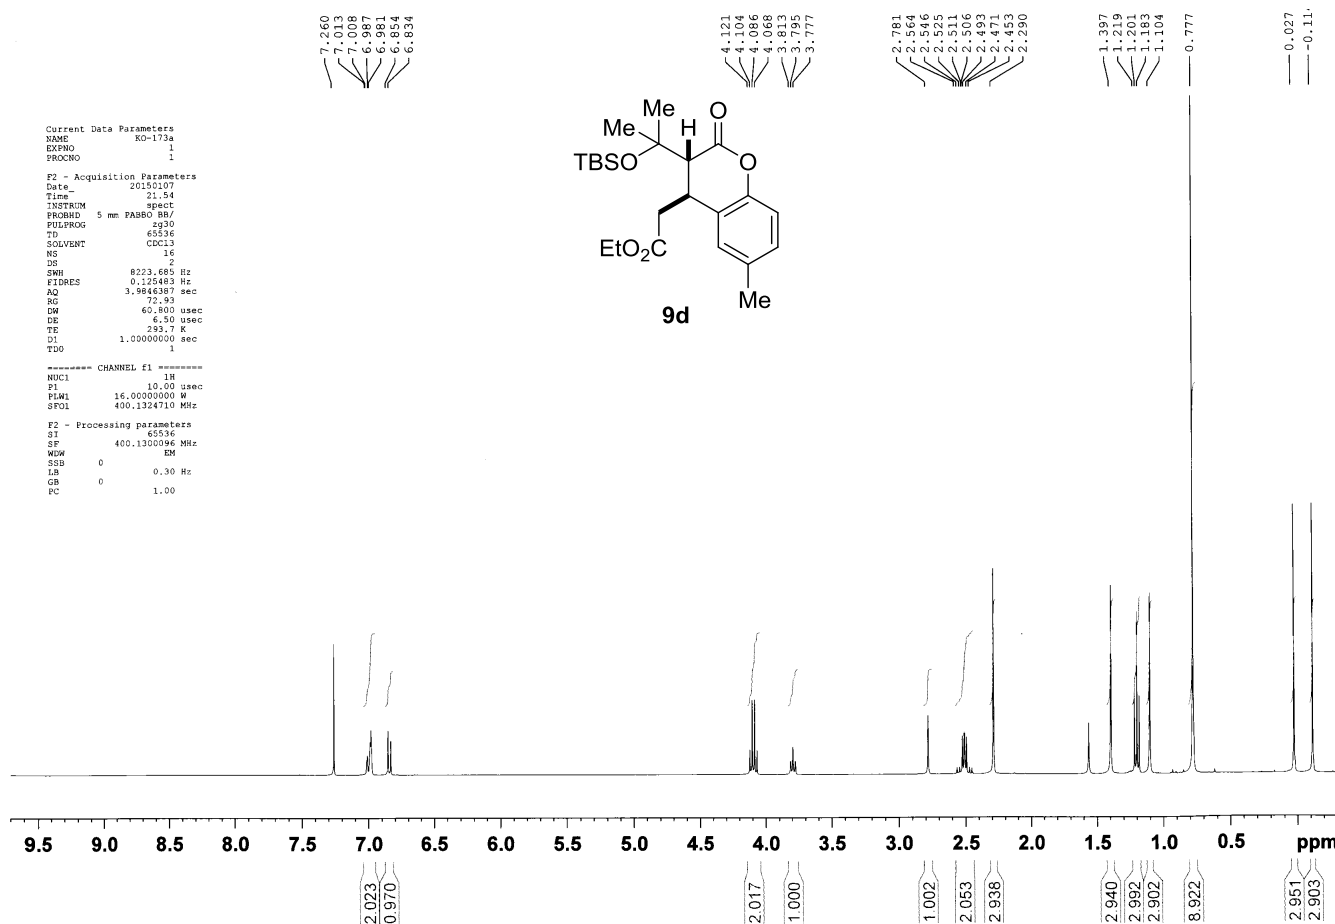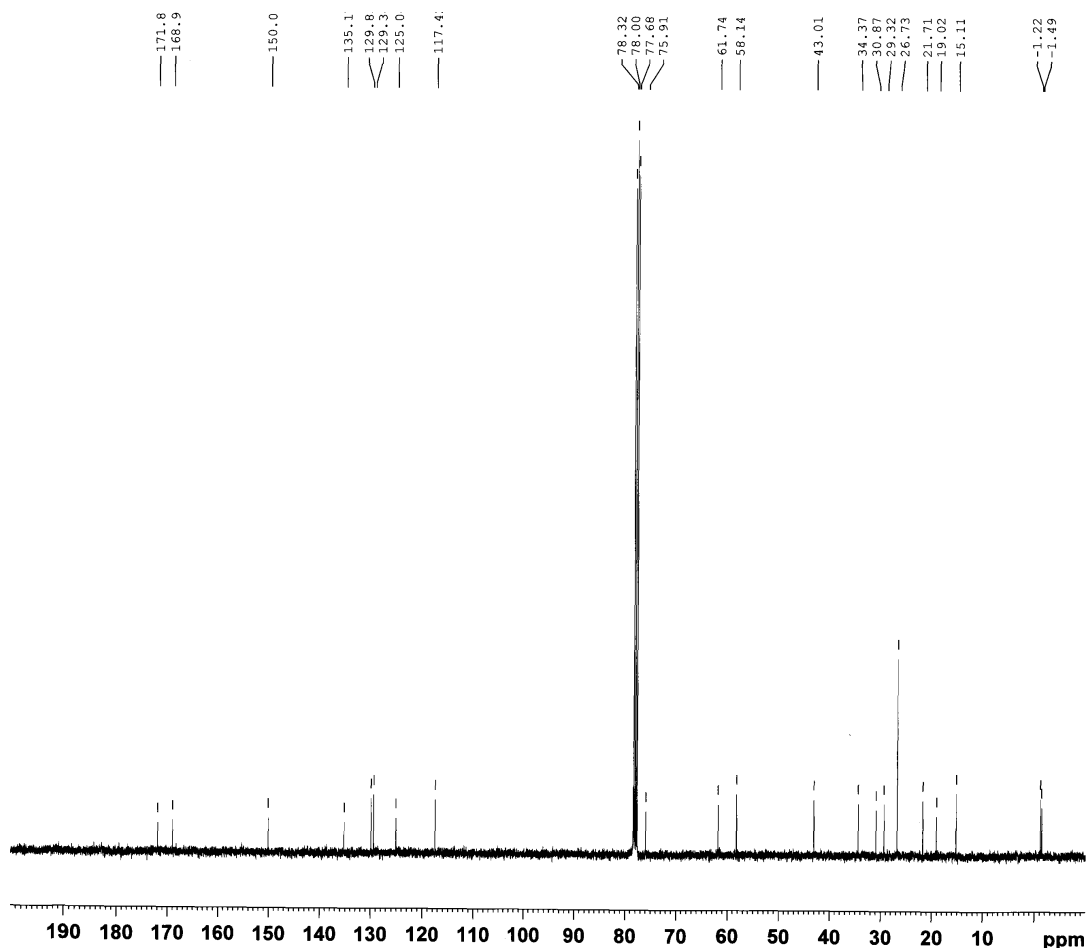

Current Data Parameters  
NAME KO-173a  
EXPNO 2  
PROCNO 1

F2 - Acquisition Parameters  
Date\_ 20150107  
Time 22.14  
INSTRUM spect  
PROBHD 5 mm PABBO BB/  
PULPROG zgpg30  
TD 65536  
SOLVENT CDCl3  
NS 382  
DS 4  
SWH 24038.461 Hz  
FIDRES 0.366798 Hz  
AQ 1.3631988 sec  
RG 204.44  
DW 20.800 usec  
DE 6.50 usec  
TE 294.3 K  
D1 2.00000000 sec  
D11 0.03000000 sec  
TDO 1

----- CHANNEL f1 -----  
NUC1 13C  
P1 10.00 usec  
PLW1 78.0000000 W  
SFO1 100.6228293 MHz

----- CHANNEL f2 -----  
CPDPRG2 waltz16  
NUC2 1H  
PCPD2 90.00 usec  
PLW2 16.00000000 W  
PLW12 0.19753000 W  
PLW13 0.16000000 W  
SFO2 400.1316005 MHz

F2 - Processing parameters  
SI 32768  
SF 100.6126711 MHz  
WDW EM  
SSB 0  
LB 1.00 Hz  
GB 0  
PC 1.40

Current Data Parameters  
 NAME KO-201a  
 EXPNO 1  
 PROCNO 1

F2 - Acquisition Parameters  
 Date 20150213  
 Time 13.04  
 INSTRUM spect  
 PROBHD 5 mm PABBO BB/  
 PULPROG zgpg30  
 TD 65536  
 SOLVENT CDCl3  
 NS 8  
 DS 2  
 SWH 8223.685 Hz  
 FIDRES 0.125483 Hz  
 AQ 3.9846387 sec  
 RG 72.93  
 DW 60.800 usec  
 DE 6.90 usec  
 TE 295.3 K  
 D1 1.0000000 sec  
 TDO 1

===== CHANNEL f1 =====  
 NUC1 1H  
 P1 10.00 usec  
 PLW1 16.0000000 W  
 SFO1 400.1324710 MHz

F2 - Processing parameters  
 SI 65536  
 SF 400.1300098 MHz  
 WDW DM  
 SSB 0  
 LB 0.30 Hz  
 GB 0  
 PC 1.00

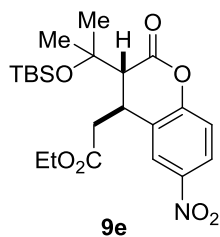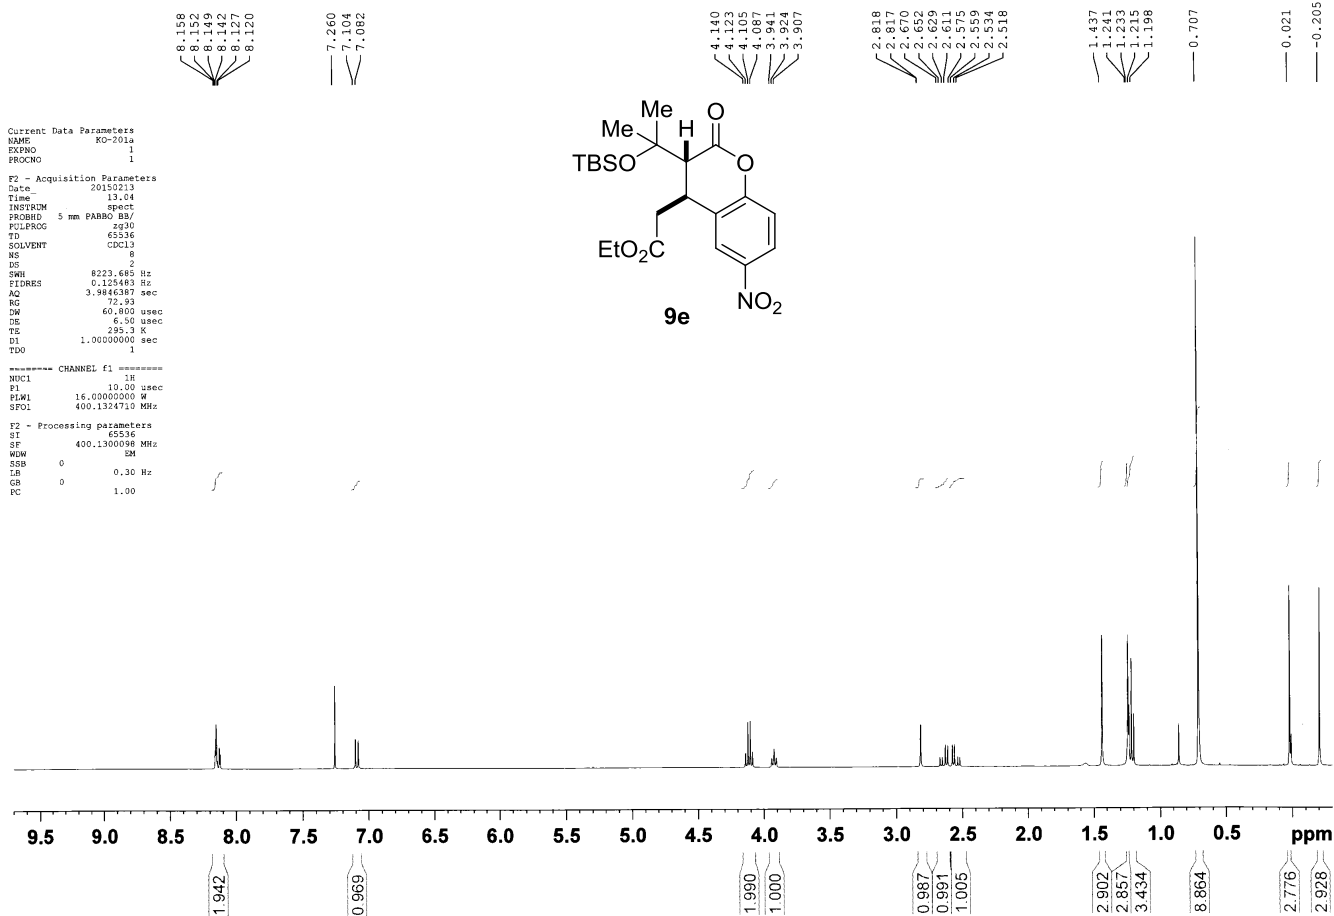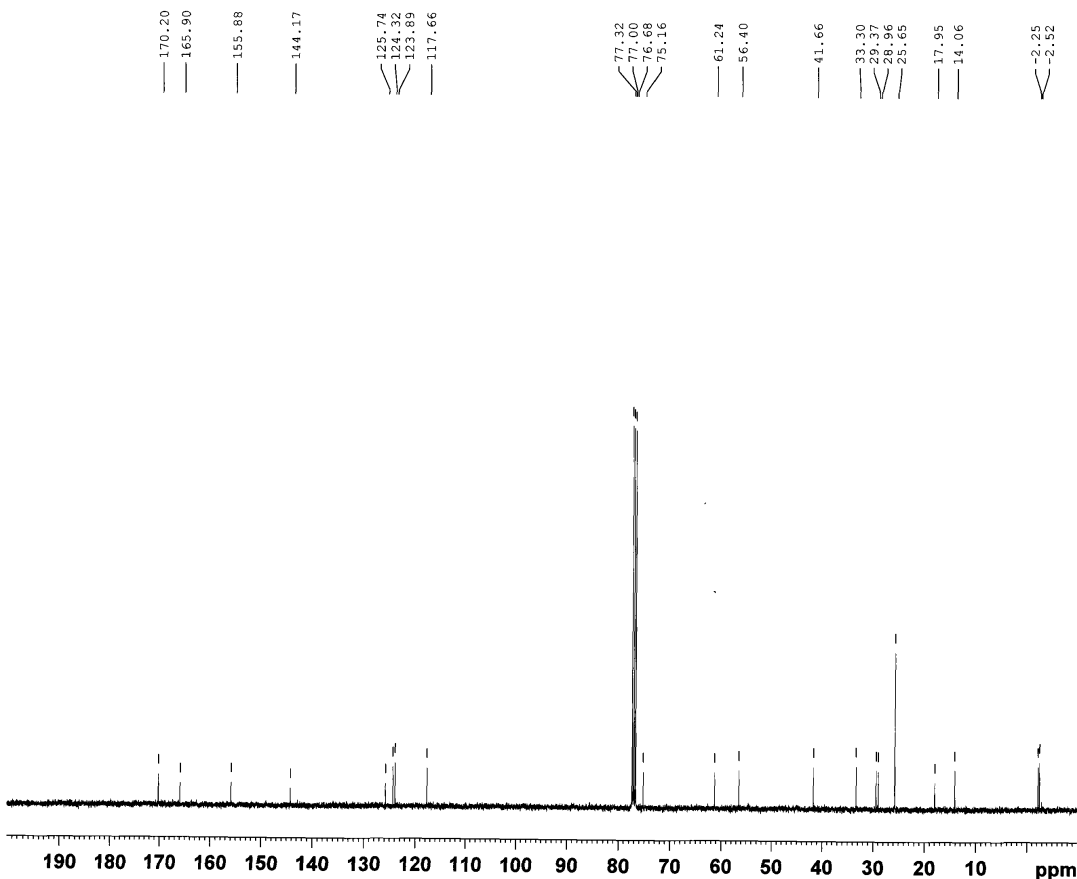

Current Data Parameters  
 NAME KO-201a  
 EXPNO 2  
 PROCNO 1

F2 - Acquisition Parameters  
 Date 20150213  
 Time 13.10  
 INSTRUM spect  
 PROBHD 5 mm PABBO BB/  
 PULPROG zgpg30  
 TD 65536  
 SOLVENT CDCl3  
 NS 256  
 DS 4  
 SWH 24038.461 Hz  
 FIDRES 0.366798 Hz  
 AQ 1.3631988 sec  
 RG 204.44  
 DW 20.800 usec  
 DE 6.50 usec  
 TE 295.7 K  
 D1 2.00000000 sec  
 D11 0.03000000 sec  
 TDO 1

===== CHANNEL f1 =====  
 NUC1 13C  
 P1 10.00 usec  
 PLW1 78.0000000 W  
 SFO1 100.6228293 MHz

===== CHANNEL f2 =====  
 CPDPRG2 waltz16  
 NUC2 1H  
 FCPD2 90.00 usec  
 PLW2 16.00000000 W  
 PLW12 0.19753000 W  
 PLW13 0.16000000 W  
 SFO2 400.1316005 MHz

F2 - Processing parameters  
 SI 32768  
 SF 100.6127710 MHz  
 WDW EM  
 SSB 0  
 LB 1.00 Hz  
 GB 0  
 PC 1.40

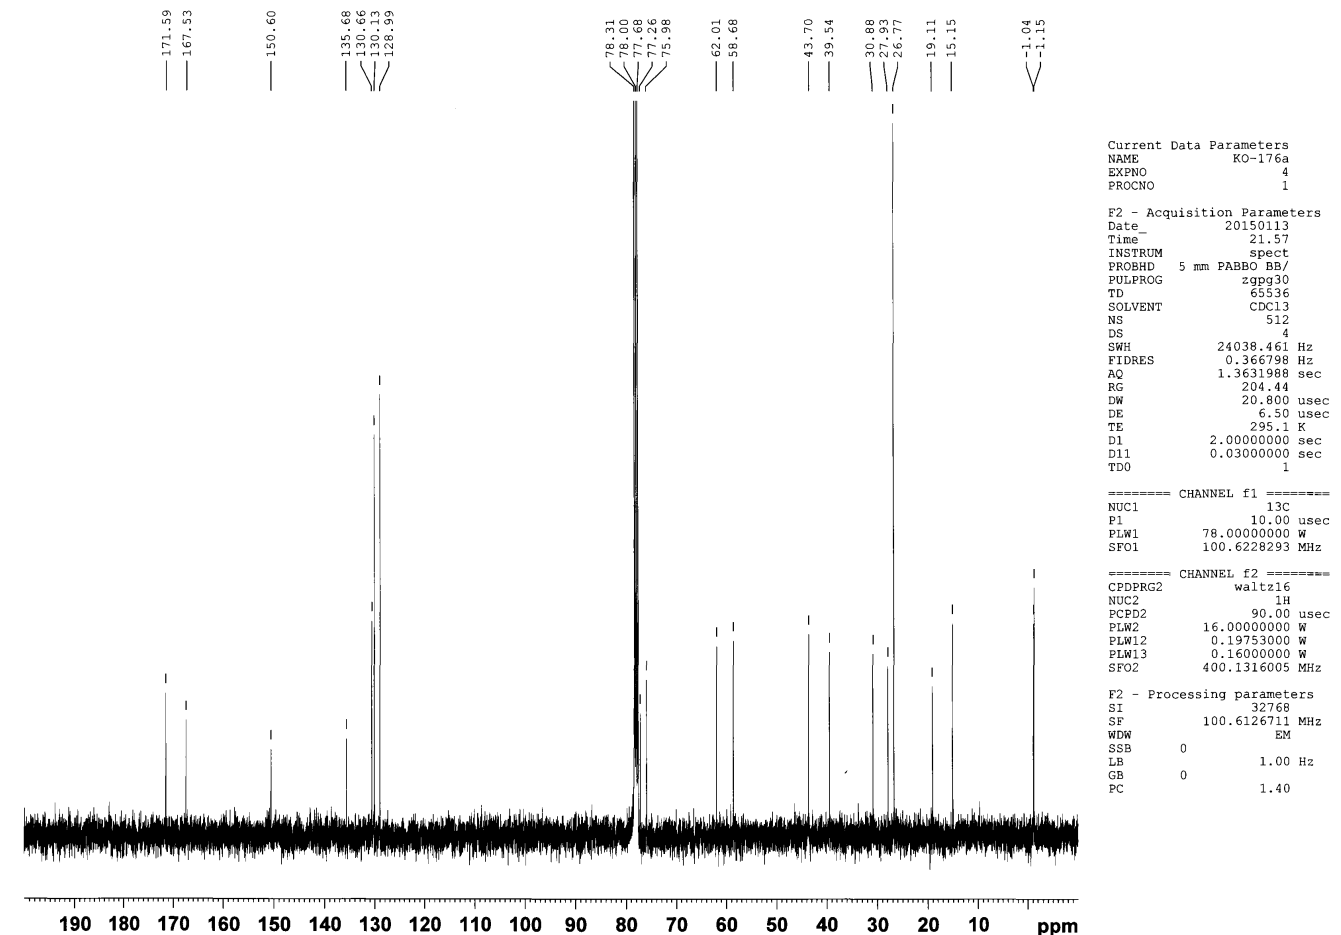

```

Current Data Parameters
NAME          KO-176a
EXPNO         1
PROCNO        4

F2 - Acquisition Parameters
Date_         20150113
Time          21.57
INSTRUM       spect
PROBHD        5 mm PABBO BB/
PULPRG        zgpg30
TD            65536
SOLVENT       CDC13
DS            512
NS            4
SWH           24038.461 Hz
FIDRES        0.366798 Hz
AQ            1.3631988 sec
RG            204.44
DE            20.800 usec
WE            6.50 usec
TE           295.1 K
D1            2.0000000 sec
D11           0.0300000 sec
TD0           1

===== CHANNEL f1 =====
NUC1          13C
P1            10.00 usec
PLW1          78.0000000 W
SFO1          100.6228293 MHz

===== CHANNEL f2 =====
CPDPRG2      waltz16
NUC2          1H
PCPD2         90.00 usec
PLW2          16.0000000 W
PLW12         0.1975300 W
PLW13         0.1600000 W
SFO2          400.1316005 MHz

F2 - Processing parameters
SI            32768
SF            100.6126711 MHz
WDW           EM
SSB           0
LB            1.00 Hz
GB            0
PC            1.40

```

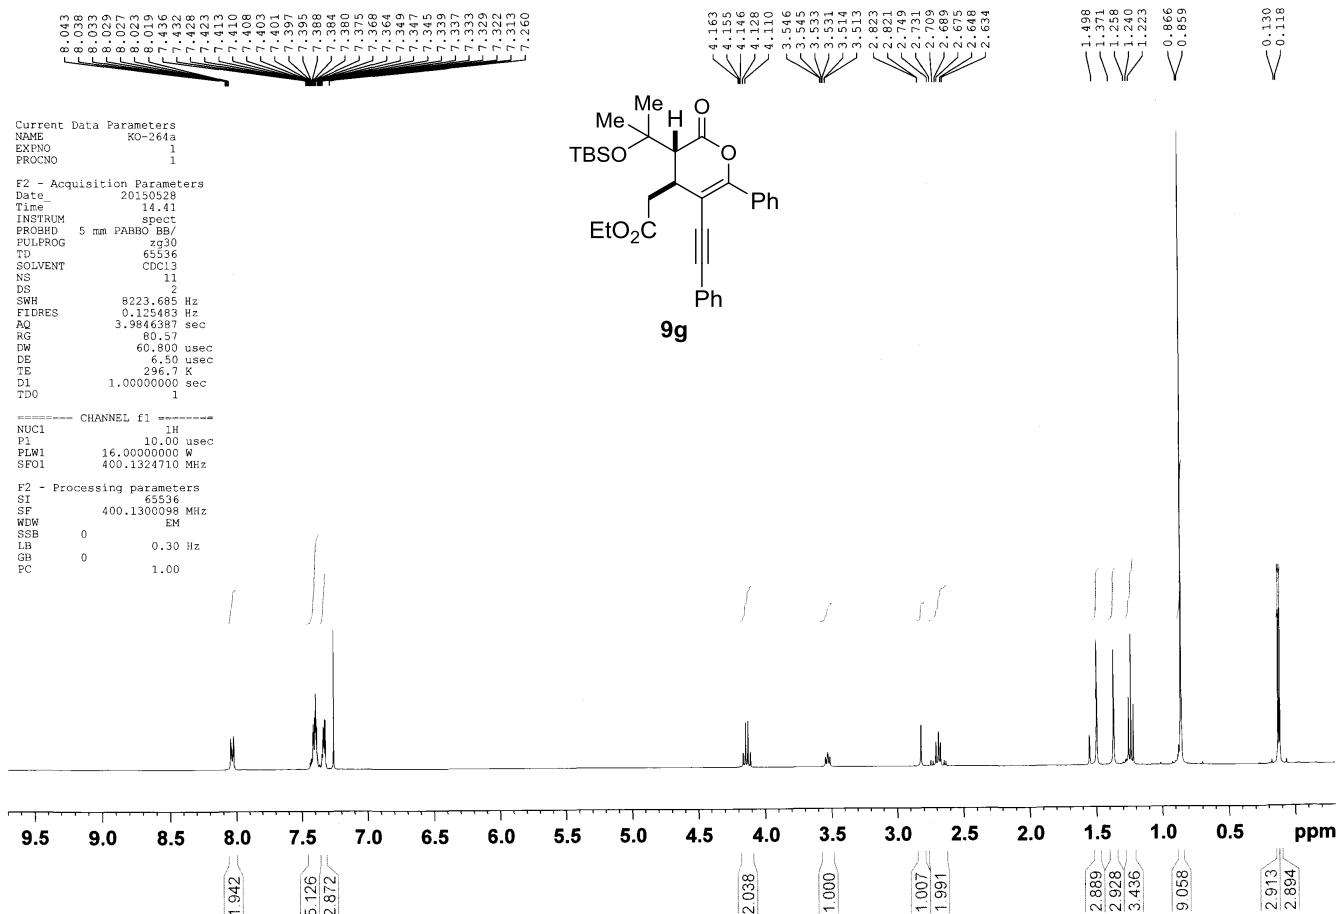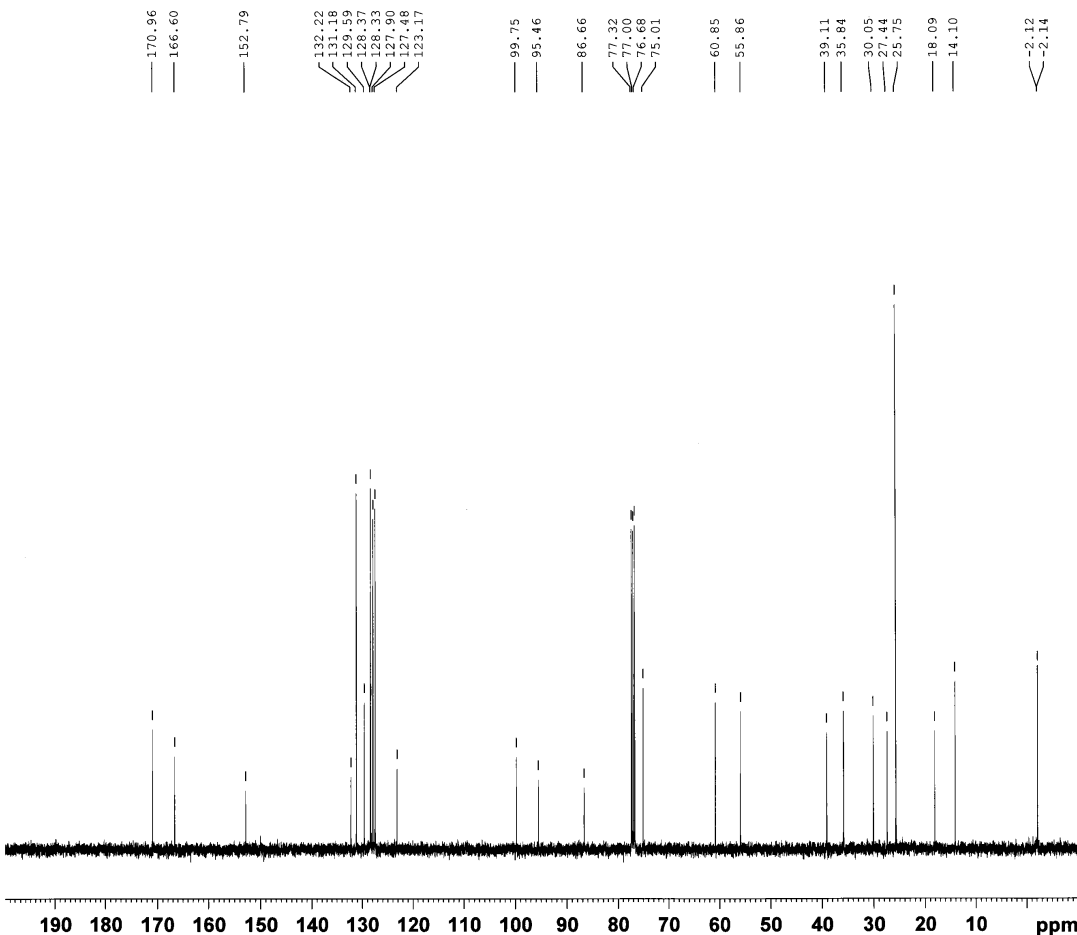

Current Data Parameters  
NAME KO-264a  
EXPNO 3  
PROCNO 1

F2 - Acquisition Parameters  
Date\_ 20150528  
Time 15:21  
INSTRUM spect  
PROBHD 5 mm PABBO BB/  
PULPROG zgpg30  
TD 65536  
SOLVENT CDCl3  
NS 36  
DS 4  
SWH 24038.461 Hz  
FIDRES 0.366798 Hz  
AQ 1.3631988 sec  
RG 204.44  
DW 20.800 usec  
DE 6.50 usec  
TE 297.1 K  
D1 2.00000000 sec  
D11 0.03000000 sec  
TDO 1

----- CHANNEL f1 -----  
NUC1 13C  
P1 10.00 usec  
PLW1 78.00000000 W  
SFO1 100.6228293 MHz

----- CHANNEL f2 -----  
CPDPRG2 waltz16  
NUC2 1H  
PCPD2 90.00 usec  
PLW2 16.00000000 W  
PLW12 0.19753000 W  
PLW13 0.16000000 W  
SFO2 400.1316005 MHz

F2 - Processing parameters  
SI 32768  
SF 100.6127749 MHz  
WDW EM  
SSB 0  
LB 1.00 Hz  
GB 0  
PC 1.40

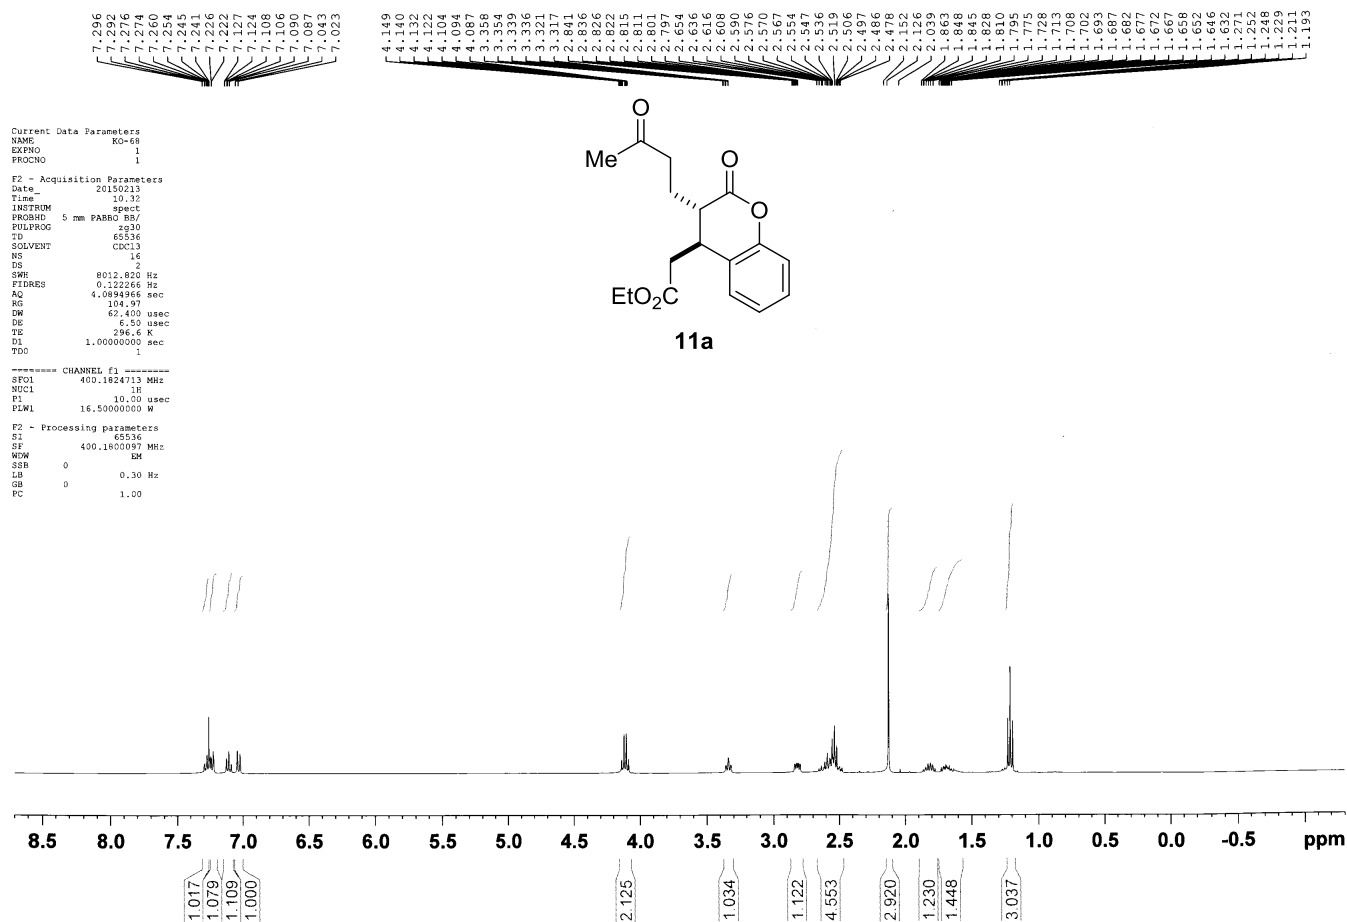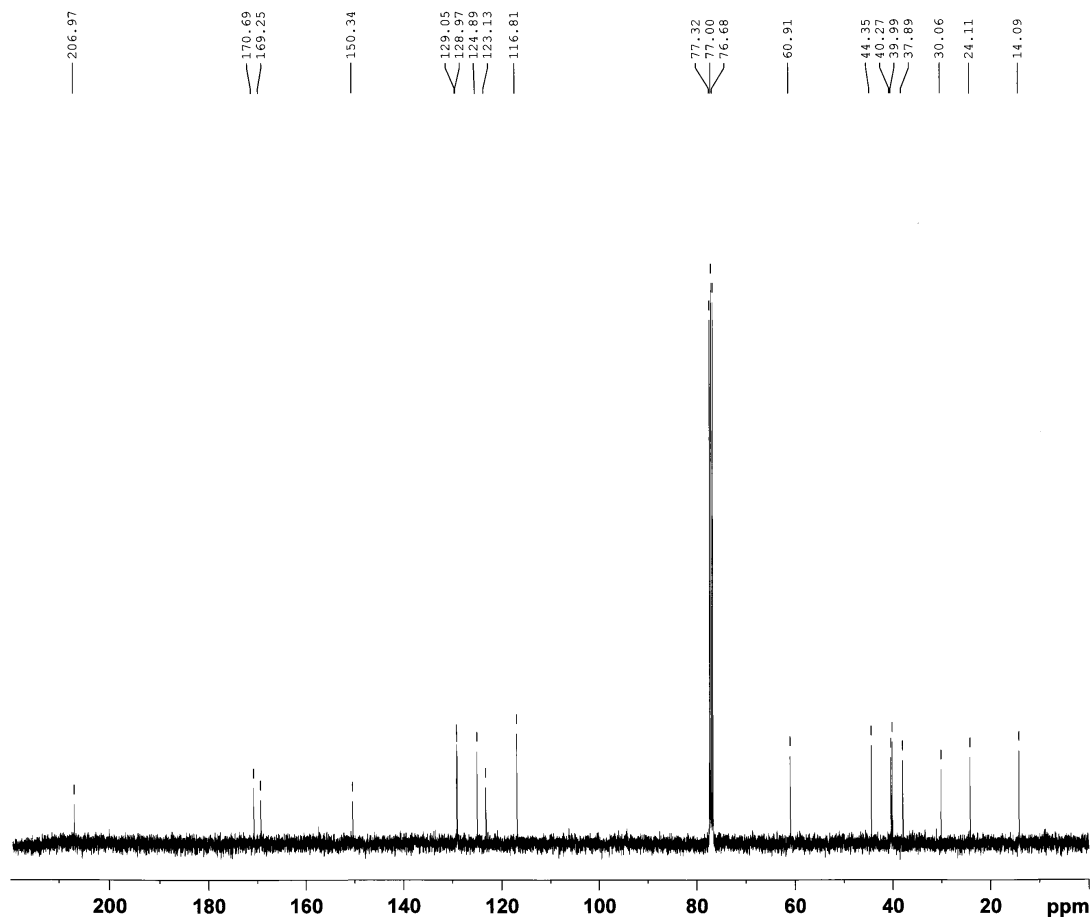

Current Data Parameters

NAME KO-68  
EXPNO 2  
PROCNO 1

F2 - Acquisition Parameters

Date\_ 20150213  
Time 10.35  
INSTRUM spect  
PROBHD 5 mm PABBO BB/  
PULPROG zgpg30  
TD 65536  
SOLVENT CDCl3  
NS 81  
DS 4  
SWH 24038.461 Hz  
FIDRES 0.366798 Hz  
AQ 1.3631988 sec  
RG 206.25  
DW 20.800 usec  
DE 6.50 usec  
TE 297.4 K  
D1 2.00000000 sec  
d11 0.03000000 sec  
DELTA 1.89999999 sec  
D12 1  
D13 1  
D14 1  
D15 1  
D16 1  
D17 1  
D18 1  
D19 1  
D20 1  
D21 1  
D22 1  
D23 1  
D24 1  
D25 1  
D26 1  
D27 1  
D28 1  
D29 1  
D30 1  
D31 1  
D32 1  
D33 1  
D34 1  
D35 1  
D36 1  
D37 1  
D38 1  
D39 1  
D40 1  
D41 1  
D42 1  
D43 1  
D44 1  
D45 1  
D46 1  
D47 1  
D48 1  
D49 1  
D50 1  
D51 1  
D52 1  
D53 1  
D54 1  
D55 1  
D56 1  
D57 1  
D58 1  
D59 1  
D60 1  
D61 1  
D62 1  
D63 1  
D64 1  
D65 1  
D66 1  
D67 1  
D68 1  
D69 1  
D70 1  
D71 1  
D72 1  
D73 1  
D74 1  
D75 1  
D76 1  
D77 1  
D78 1  
D79 1  
D80 1  
D81 1  
D82 1  
D83 1  
D84 1  
D85 1  
D86 1  
D87 1  
D88 1  
D89 1  
D90 1  
D91 1  
D92 1  
D93 1  
D94 1  
D95 1  
D96 1  
D97 1  
D98 1  
D99 1  
D100 1

F2 - Processing parameters

SI 32768  
SF 100.6253445 MHz  
WDW EM  
SSB 0  
LB 1.00 Hz  
GB 0  
PC 1.40

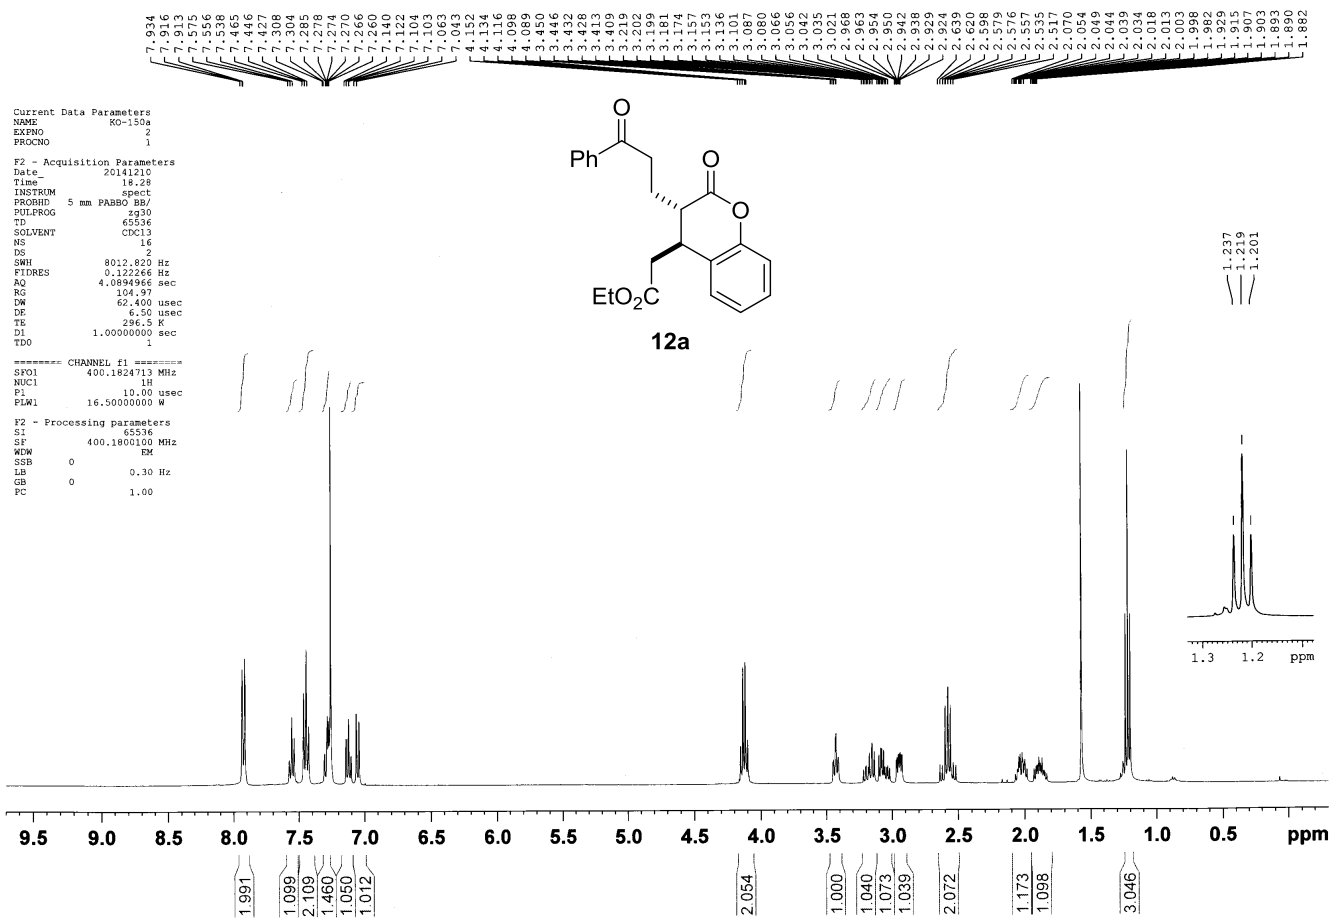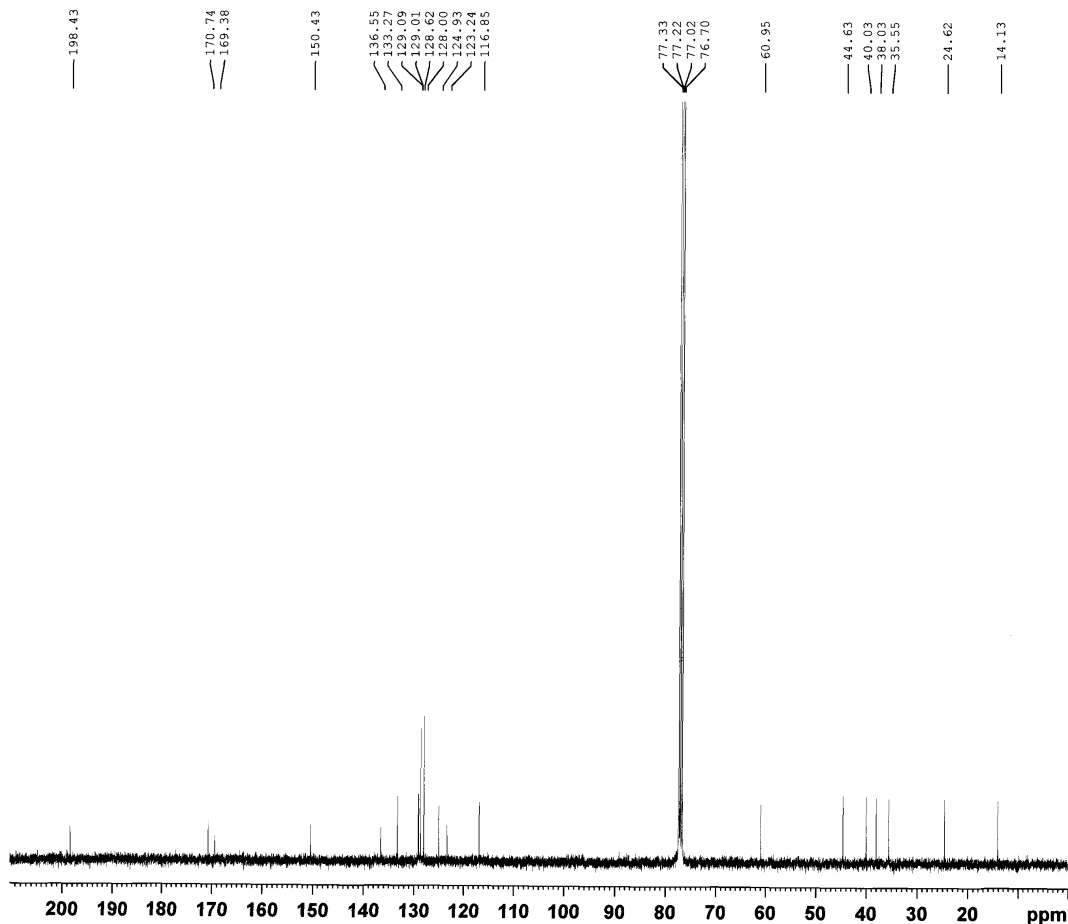

Current Data Parameters  
NAME KO-150a  
EXPNO 3  
PROCNO 1

F2 - Acquisition Parameters  
Date 20141210  
Time 18.59  
INSTRUM spect  
PROBHD 5 mm PABBO BB/  
PULPROG zg30  
TD 65336  
SOLVENT CDC13  
NS 512  
DS 4  
SWH 24038.461 Hz  
FIDRES 0.366798 Hz  
AQ 1.3631488 sec  
RG 206.25  
DW 20.800 usec  
DE 6.50 usec  
TE 297.9 K  
D1 2.00000000 sec  
D11 0.03000000 sec  
TDO 1

===== CHANNEL f1 =====  
SFO1 100.6354031 MHz  
NUC1 13C  
P1 10.00 usec  
PLW1 63.50000000 W

===== CHANNEL f2 =====  
SFO2 400.1816007 MHz  
NUC2 1H  
CPDPRG2 waltz16  
PCPD2 90.00 usec  
PLW2 16.50000000 W  
PLW12 0.20370001 W  
PLW13 0.16500001 W

F2 - Processing parameters  
SI 32768  
SF 100.6253420 MHz  
WDW EM  
SSB 0  
LB 1.00 Hz  
GB 0  
PC 1.40



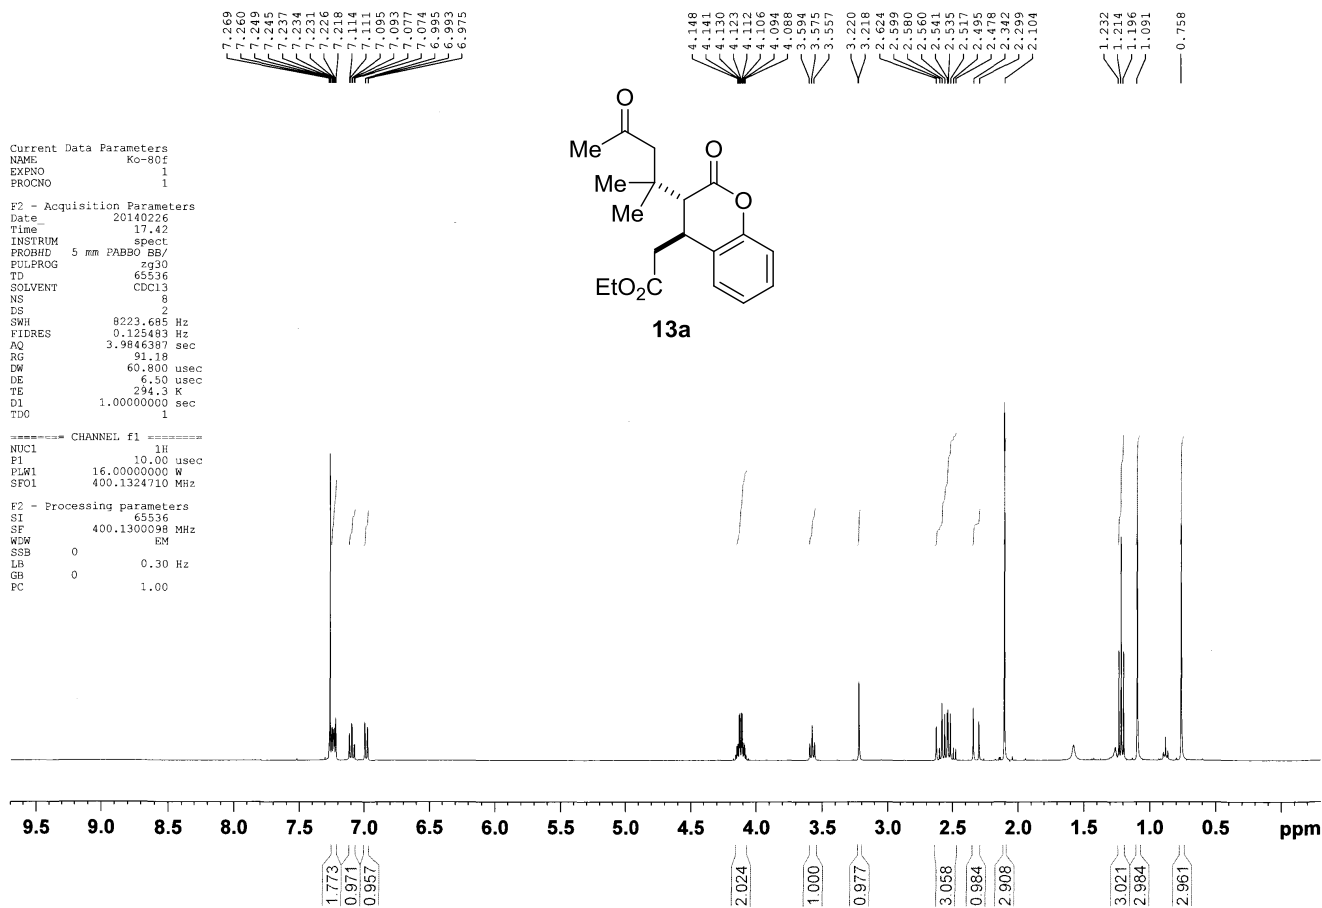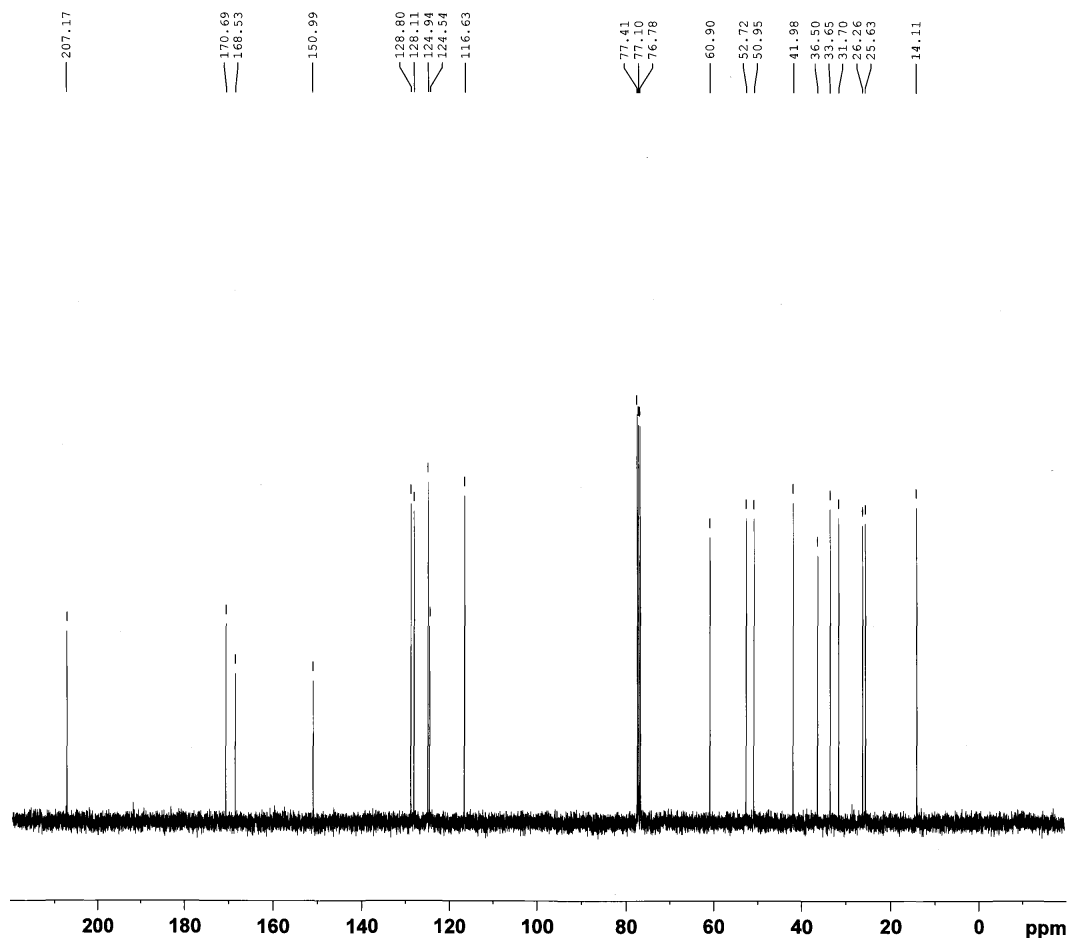

Current Data Parameters  
NAME: Ko-80f  
EXPNO: 2  
PROCNO: 1

F2 - Acquisition Parameters  
Date\_: 20140227  
Time: 18.24  
INSTRUM: spect  
PROBHD: 5 mm PABBO BB/  
PULPROG: zgpg30  
TD: 65536  
SOLVENT: CDCl3  
NS: 28  
DS: 4  
SWH: 24038.461 Hz  
FIDRES: 0.366798 Hz  
AQ: 1.3631988 sec  
RG: 204.44  
DW: 20.800 usec  
DE: 6.50 usec  
TE: 294.3 K  
D1: 2.00000000 sec  
D11: 0.03000000 sec  
TDO: 1

===== CHANNEL f1 =====  
NUC1: 13C  
P1: 10.00 usec  
PLW1: 78.00000000 W  
SF01: 100.6228293 MHz

===== CHANNEL f2 =====  
CPDPRG2: waltz16  
NUC2: 1H  
PCPD2: 90.00 usec  
PLW2: 16.00000000 W  
PLW12: 0.19753000 W  
PLW13: 0.16000000 W  
SF02: 400.1316005 MHz

F2 - Processing parameters  
SI: 32768  
SF: 100.6127690 MHz  
WDW: EM  
SSB: 0  
LB: 1.00 Hz  
GB: 0  
PC: 1.40

Current Data Parameters  
 NAME KO-275b-1  
 EXPNO 2  
 PROCNO 1

F2 - Acquisition Parameters  
 Date 20150725  
 Time 14.05  
 INSTRUM spect  
 PROBHD 5 mm PABBO BB/  
 PULPROG zg30  
 TD 65536  
 SOLVENT CDCl3  
 NS 8  
 DS 2  
 SWH 8223.685 Hz  
 FIDRES 0.125483 Hz  
 AQ 3.9846387 sec  
 RG 103.11  
 DW 60.800 usec  
 DE 6.50 usec  
 TE 297.2 K  
 D1 1.00000000 sec  
 TDO 1

===== CHANNEL f1 =====  
 NUC1 1H  
 P1 10.00 usec  
 PLW1 16.00000000 W  
 SFO1 400.1324710 MHz

F2 - Processing parameters  
 SI 65536  
 SF 400.1300099 MHz  
 WDW EM  
 SSB 0  
 LB 0.30 Hz  
 GB 0  
 PC 1.00

7.360  
7.162  
7.158  
7.142  
7.138  
7.071  
7.067  
7.052  
7.044  
7.032  
7.028  
6.878  
6.875  
6.859  
6.856  
6.850  
6.837  
6.754  
6.751  
6.734  
6.731

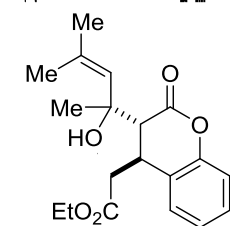

5.428  
5.353  
5.350  
5.347  
4.253  
4.245  
4.234  
4.226  
4.215  
4.207  
4.198  
4.129  
4.123  
4.111  
4.105  
4.093  
4.087  
4.075  
3.462  
3.443  
3.418  
3.399  
3.214  
3.207  
3.054  
3.035  
3.016  
2.992

1.936  
1.935  
1.267  
1.212  
1.194  
1.176  
0.534

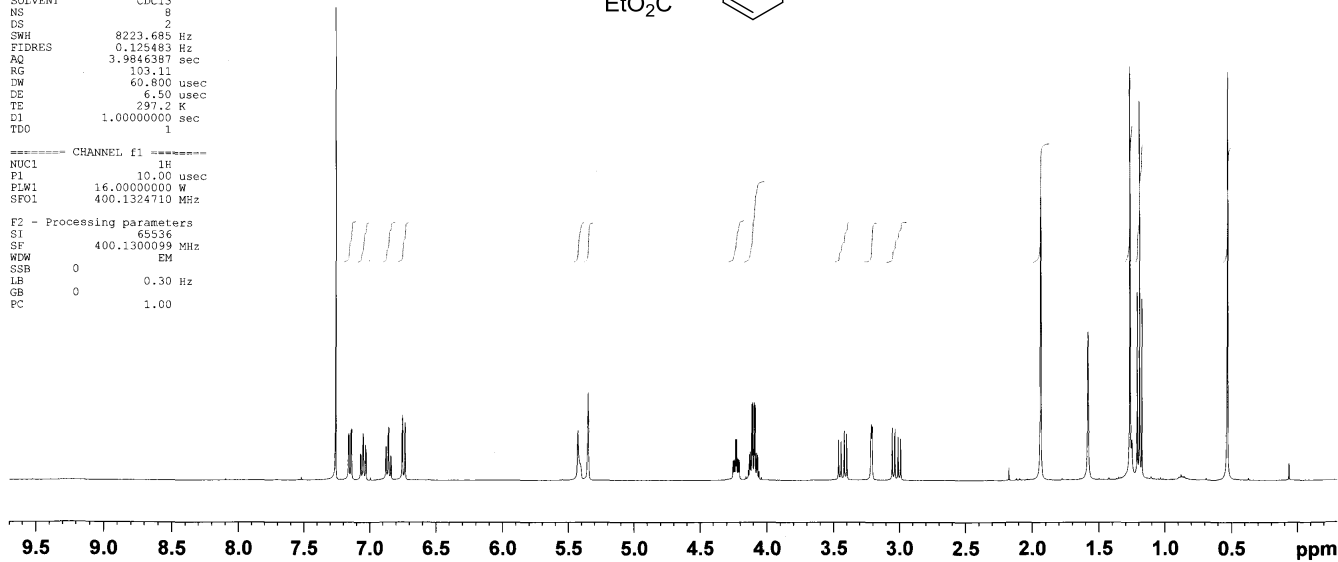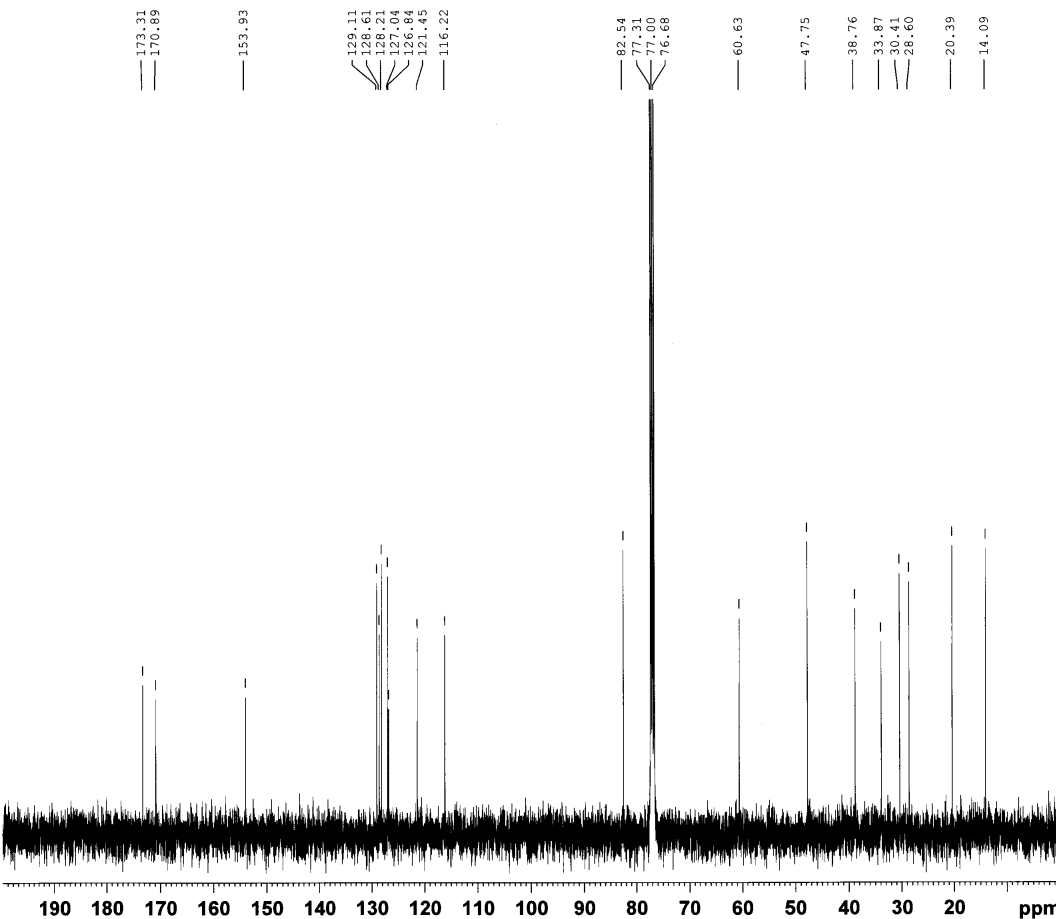

Current Data Parameters  
 NAME KO-275b-1  
 EXPNO 3  
 PROCNO 1

F2 - Acquisition Parameters  
 Date 20150725  
 Time 14.37  
 INSTRUM spect  
 PROBHD 5 mm PABBO BB/  
 PULPROG zgpg30  
 TD 65536  
 SOLVENT CDCl3  
 NS 1024  
 DS 4  
 SWH 24038.461 Hz  
 FIDRES 0.366798 Hz  
 AQ 1.3631988 sec  
 RG 204.44  
 DW 20.800 usec  
 DE 6.50 usec  
 TE 297.6 K  
 D1 2.00000000 sec  
 D11 0.03000000 sec  
 TDO 1

===== CHANNEL f1 =====  
 NUC1 13C  
 P1 10.00 usec  
 PLW1 78.00000000 W  
 SFO1 100.6228293 MHz

===== CHANNEL f2 =====  
 CPDPRG2 waltz16  
 NUC2 1H  
 PCPD2 90.00 usec  
 PLW2 16.00000000 W  
 PLW12 0.19753000 W  
 PLW13 0.16000000 W  
 SFO2 400.1316005 MHz

F2 - Processing parameters  
 SI 32768  
 SF 100.6127710 MHz  
 WDW EM  
 SSB 0  
 LB 1.00 Hz  
 GB 0  
 PC 1.40

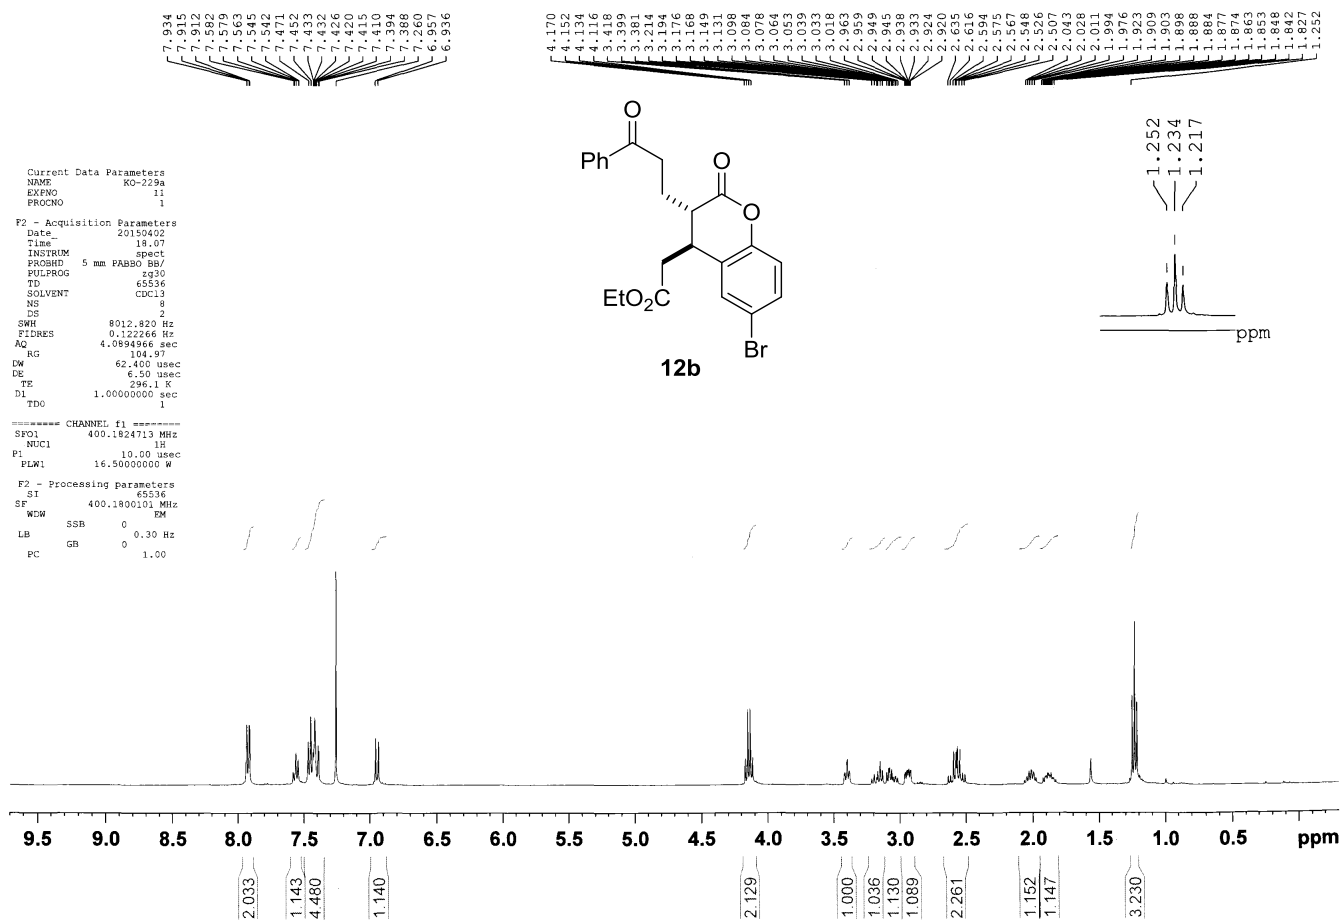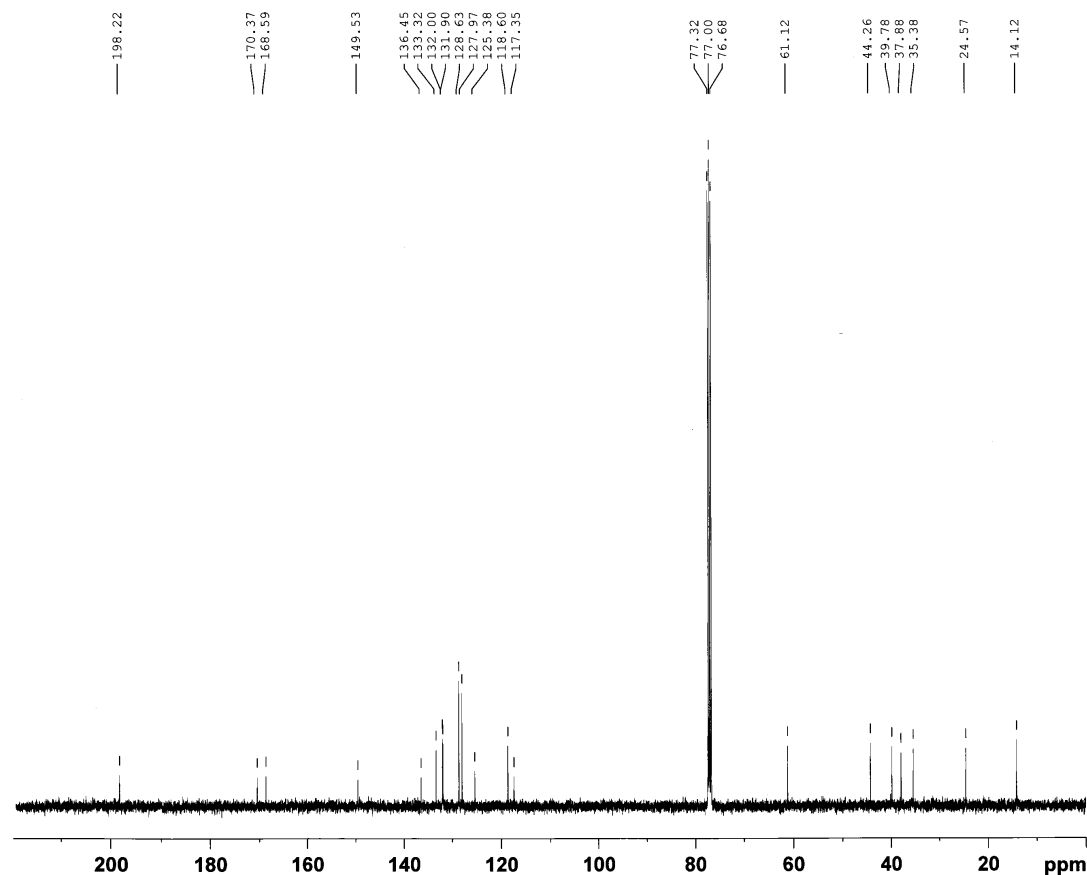

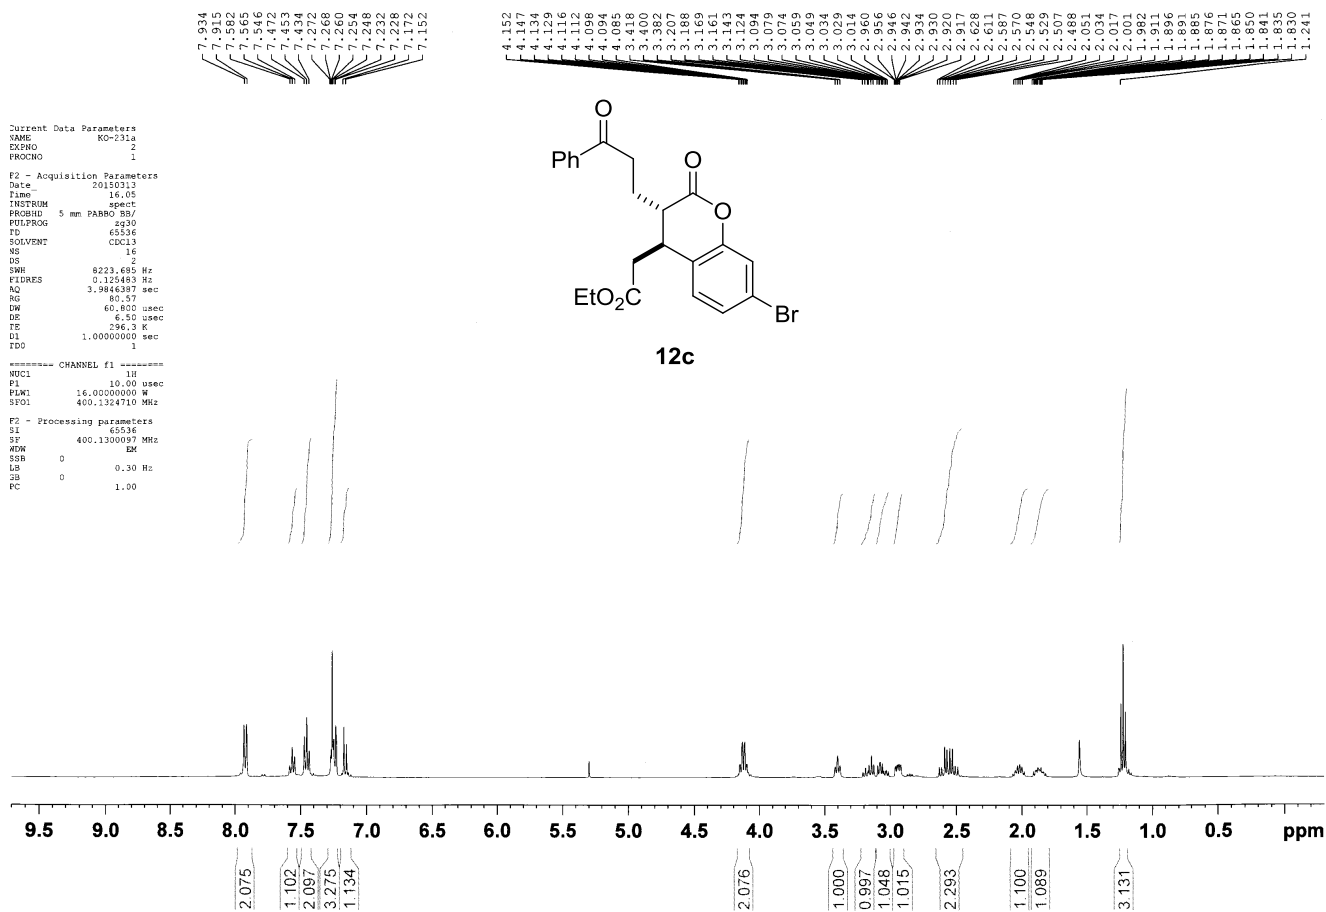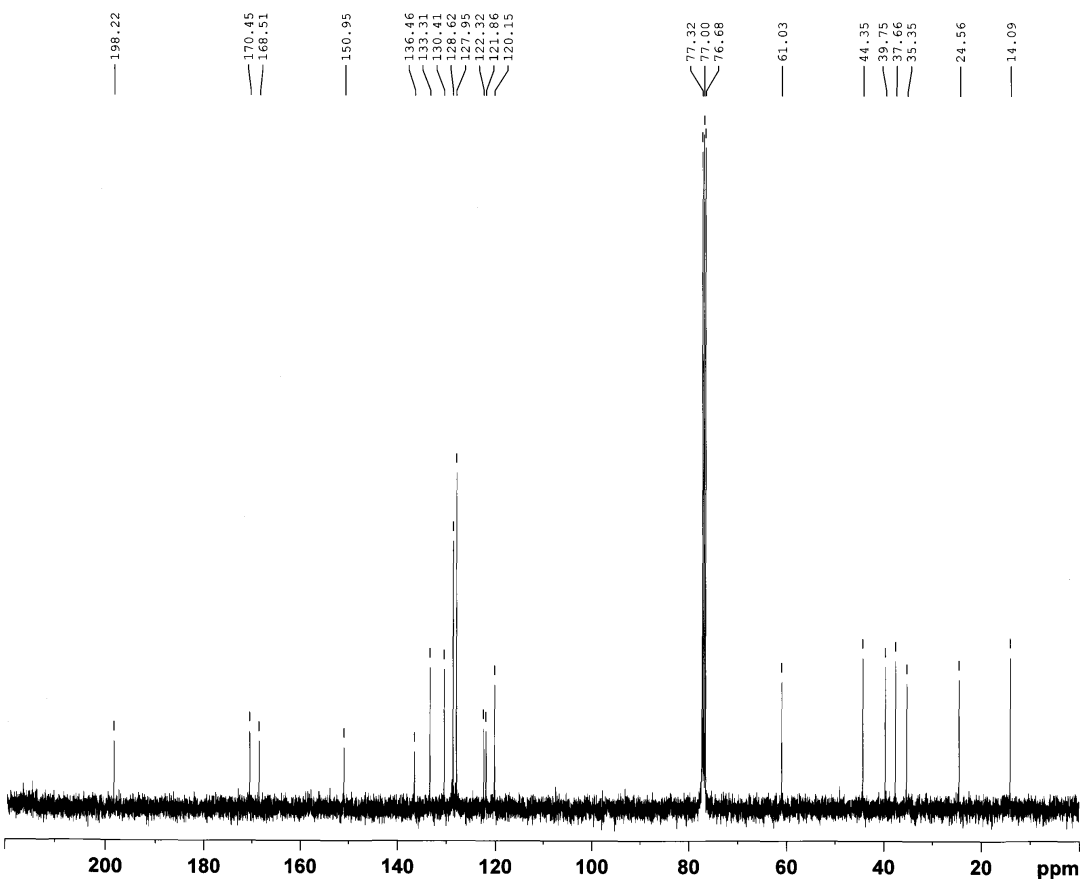

Current Data Parameters  
NAME KO-231a  
EXPNO 12  
PROCNO 1

F2 - Acquisition Parameters  
Date 20150404  
Time 18.58  
INSTRUM spect  
PROBHD 5 mm PABBO BB/  
PULPROG zgpg30  
TD 65536  
SOLVENT CDCl3  
NS 193  
DS 4  
SWH 24038.461 Hz  
FIDRES 0.366798 Hz  
AQ 1.3631988 sec  
RG 204.44  
DW 20.800 usec  
DE 6.50 usec  
TE 297.6 K  
D1 2.00000000 sec  
D11 0.03000000 sec  
TD0 1

===== CHANNEL f1 =====  
NUC1 13C  
P1 10.00 usec  
PLW1 78.00000000 W  
SFO1 100.6228293 MHz

===== CHANNEL f2 =====  
CPDPRG2 waltz16  
NUC2 1H  
PCPD2 90.00 usec  
PLW2 16.00000000 W  
PLW12 0.19753000 W  
PLW13 0.16000000 W  
SFO2 400.1316005 MHz

F2 - Processing parameters  
SI 32768  
SF 100.6127723 MHz  
WDW EM  
SSB 0  
LB 1.00 Hz  
GB 0  
PC 1.40

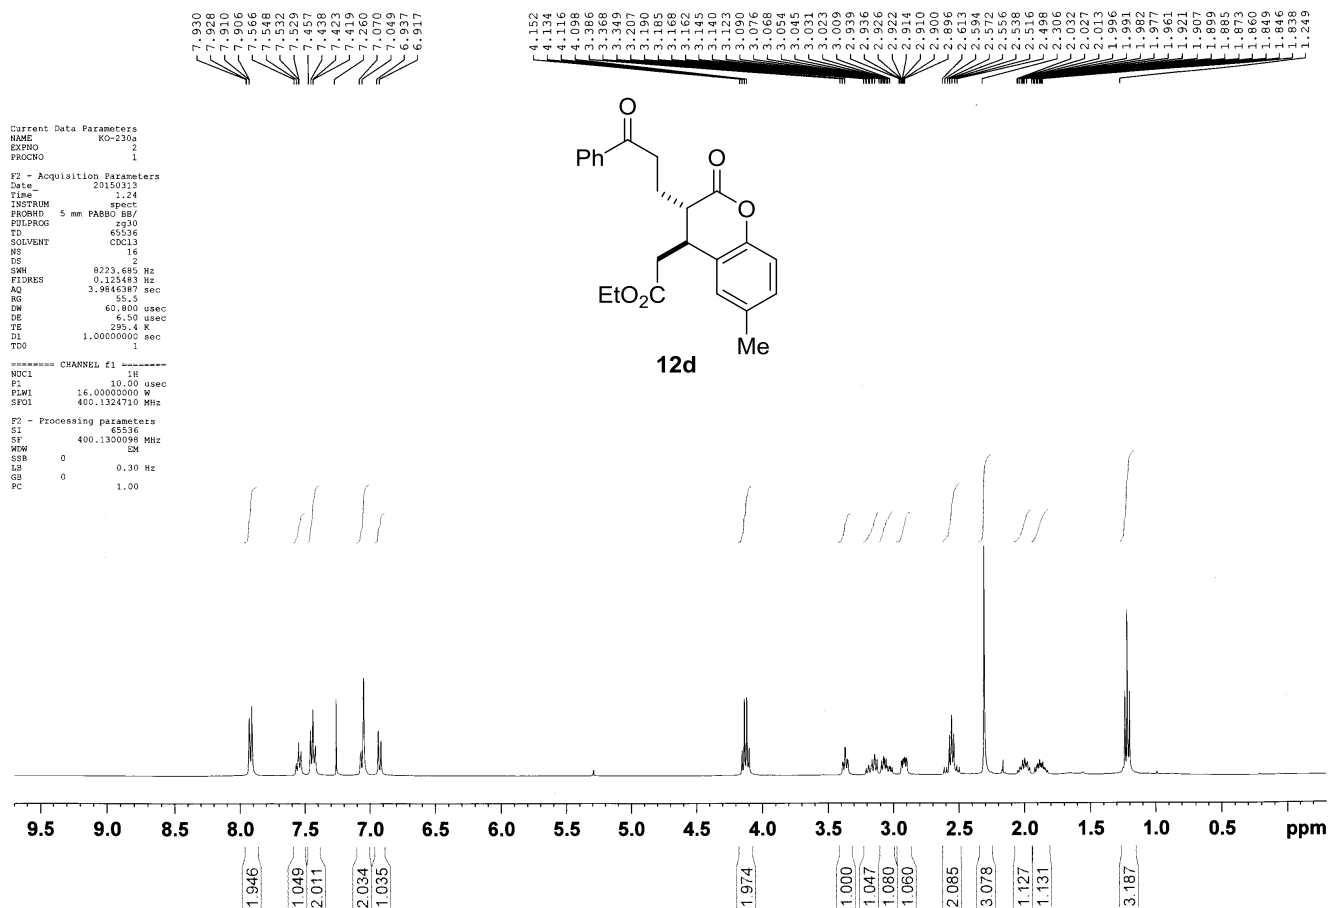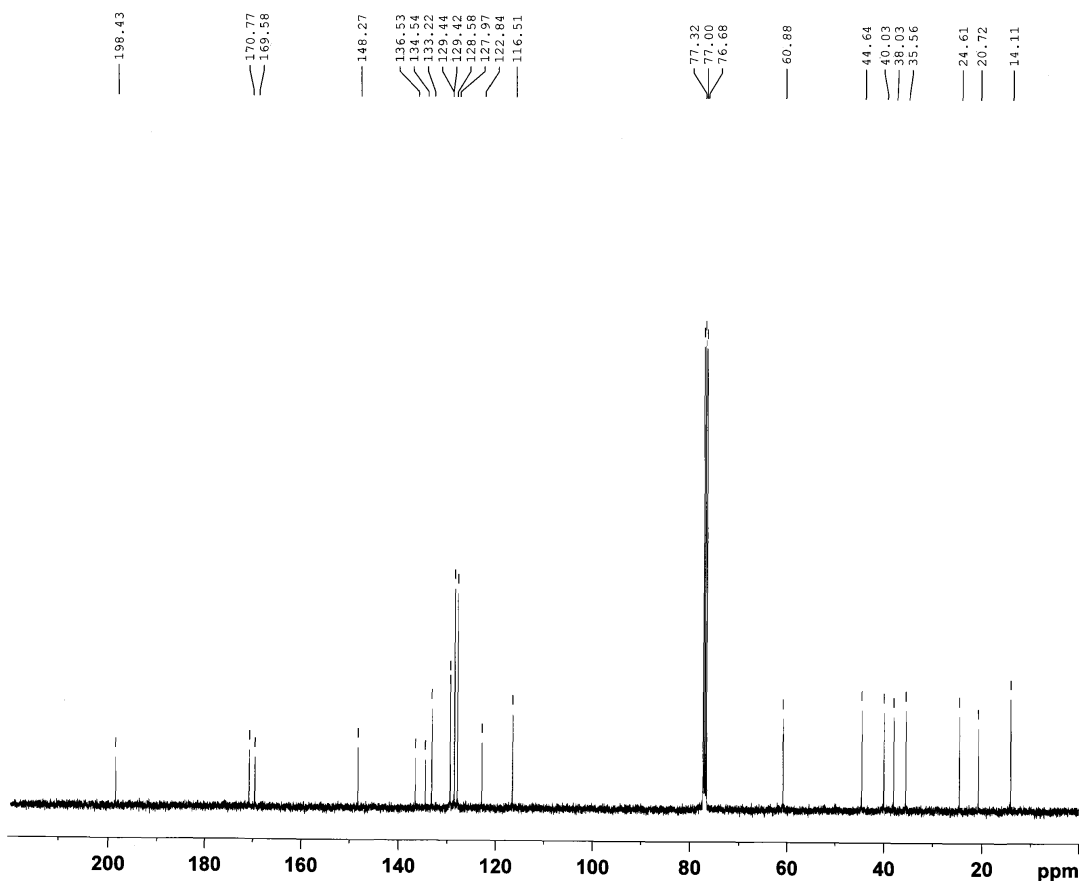

Current Data Parameters

|        |         |
|--------|---------|
| NAME   | KO-230a |
| EXPNO  | 3       |
| PROCNO | 1       |

F2 - Acquisition Parameters

|         |                |
|---------|----------------|
| Date_   | 20150313       |
| Time    | 1.31           |
| INSTRUM | spect          |
| PROBHD  | 5 mm PABBO BB/ |
| PULPROG | zgpg30         |
| TD      | 65536          |
| SOLVENT | CDCl3          |
| NS      | 512            |
| DS      | 4              |
| SWH     | 24038.461 Hz   |
| FIDRES  | 0.366798 Hz    |
| AQ      | 1.3631988 sec  |
| RG      | 204.44         |
| DW      | 20.800 usec    |
| DE      | 6.50 usec      |
| TE      | 295.5 K        |
| D1      | 2.00000000 sec |
| D11     | 0.03000000 sec |
| TD0     | 1              |

===== CHANNEL f1 =====

|      |                 |
|------|-----------------|
| NUC1 | 13C             |
| P1   | 10.00 usec      |
| PLW1 | 78.00000000 W   |
| SFO1 | 100.6228293 MHz |

===== CHANNEL f2 =====

|         |                 |
|---------|-----------------|
| CPDPRG2 | waltz16         |
| NUC2    | 1H              |
| PCPD2   | 90.00 usec      |
| PLW2    | 16.00000000 W   |
| PLW12   | 0.19753000 W    |
| PLW13   | 0.16000000 W    |
| SFO2    | 400.1316005 MHz |

F2 - Processing parameters

|     |                 |
|-----|-----------------|
| SI  | 32768           |
| SF  | 100.6127724 MHz |
| WDW | EM              |
| SSB | 0               |
| LB  | 1.00 Hz         |
| GB  | 0               |
| PC  | 1.40            |

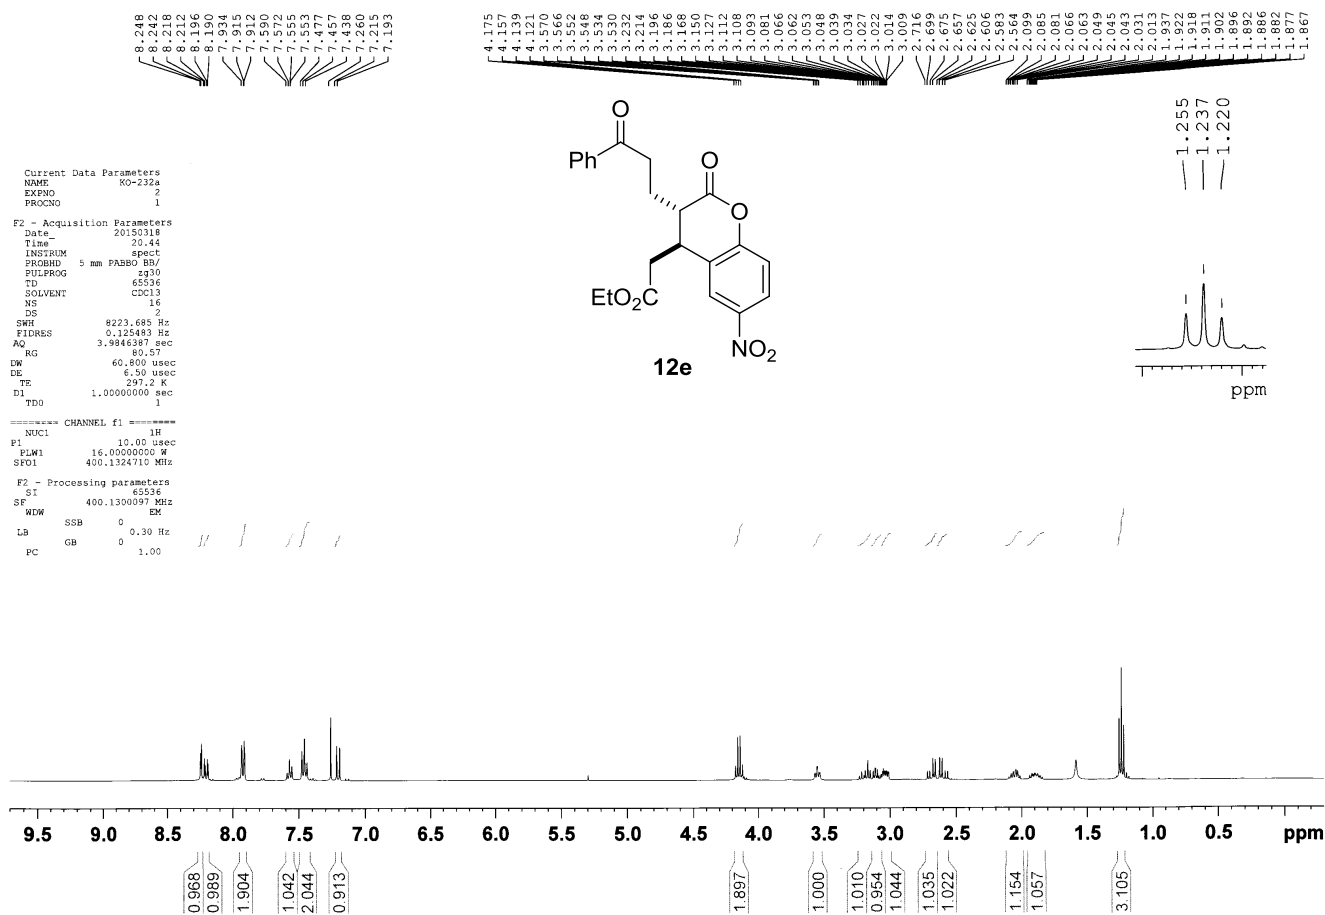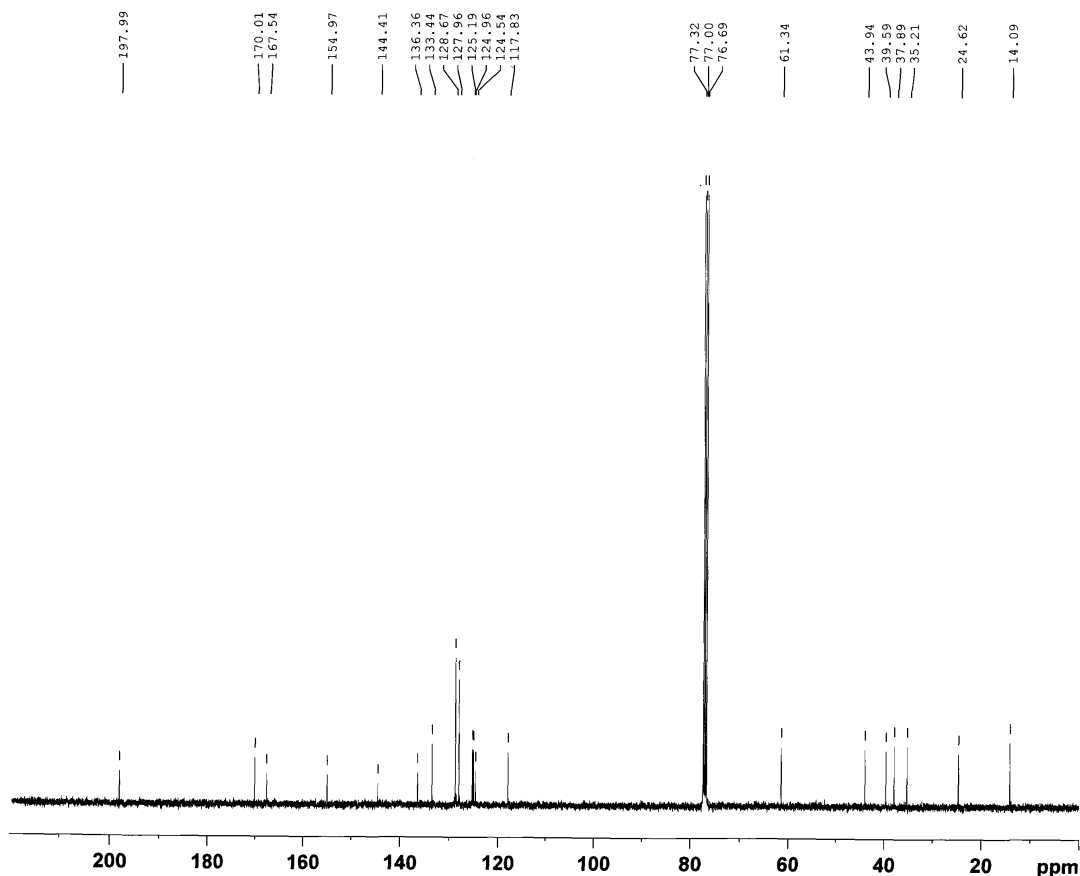

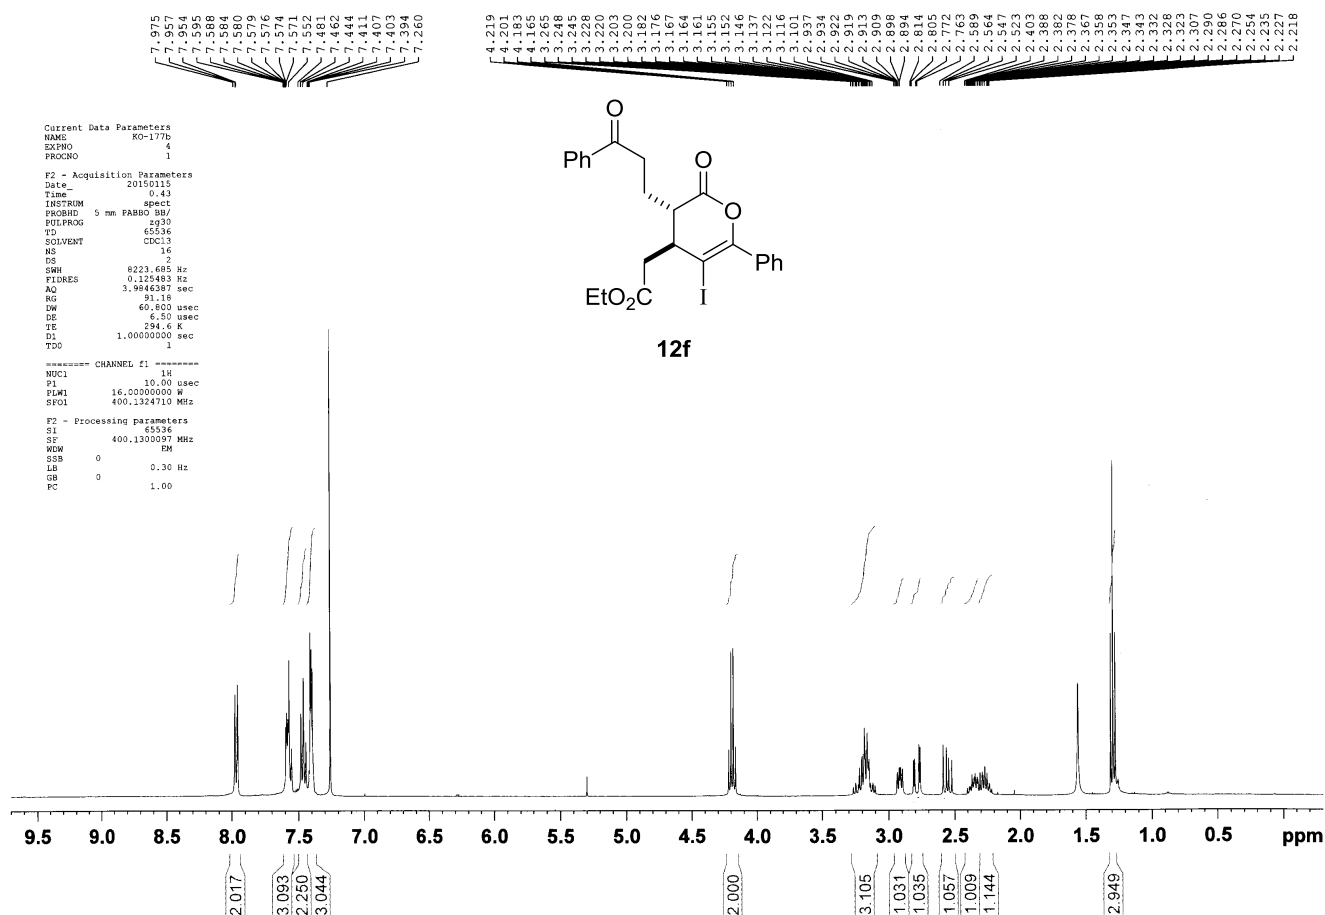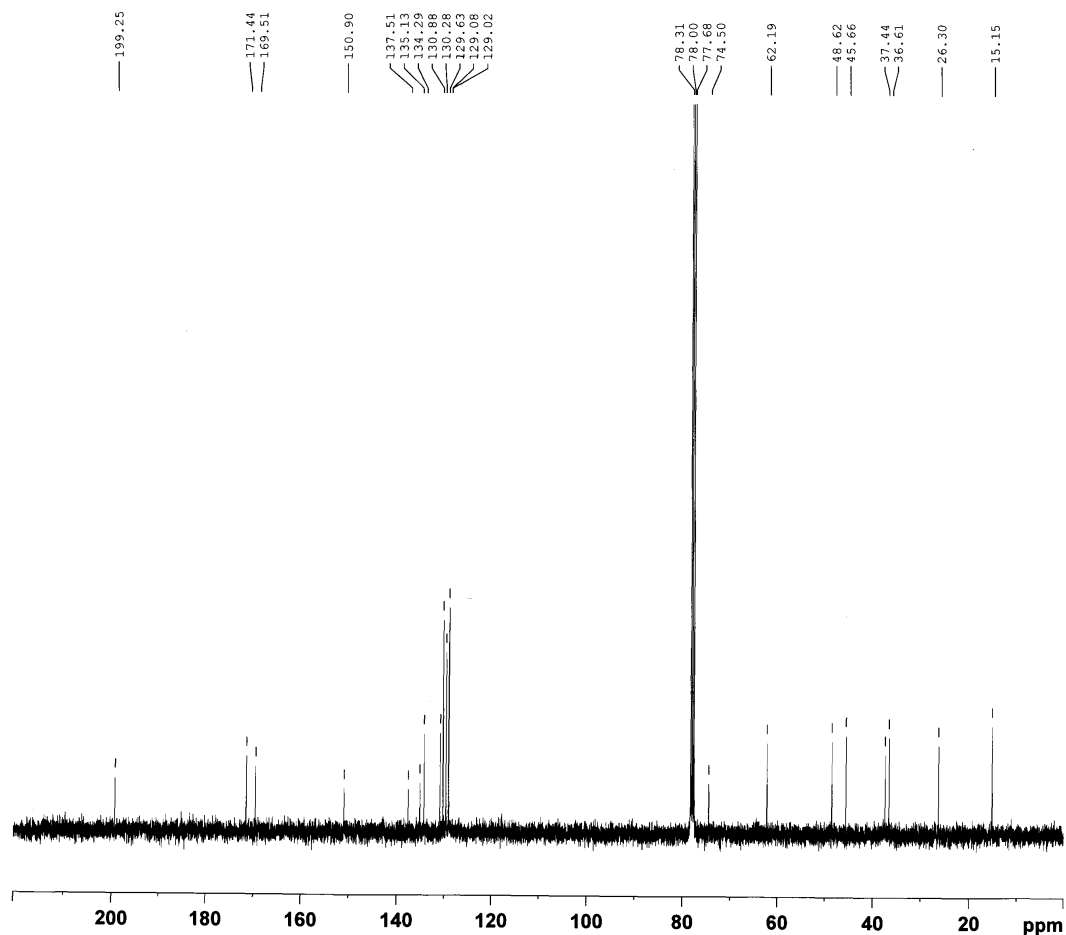

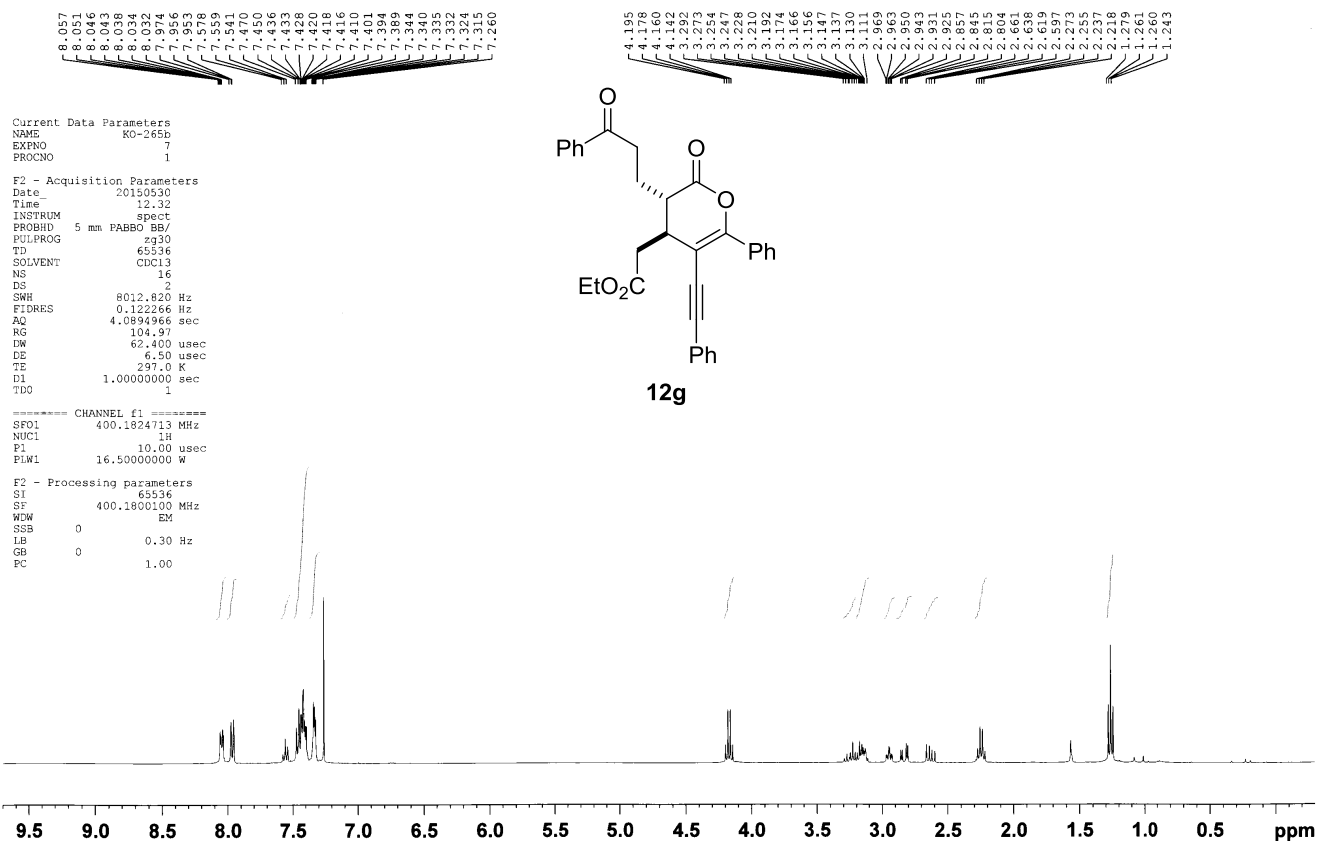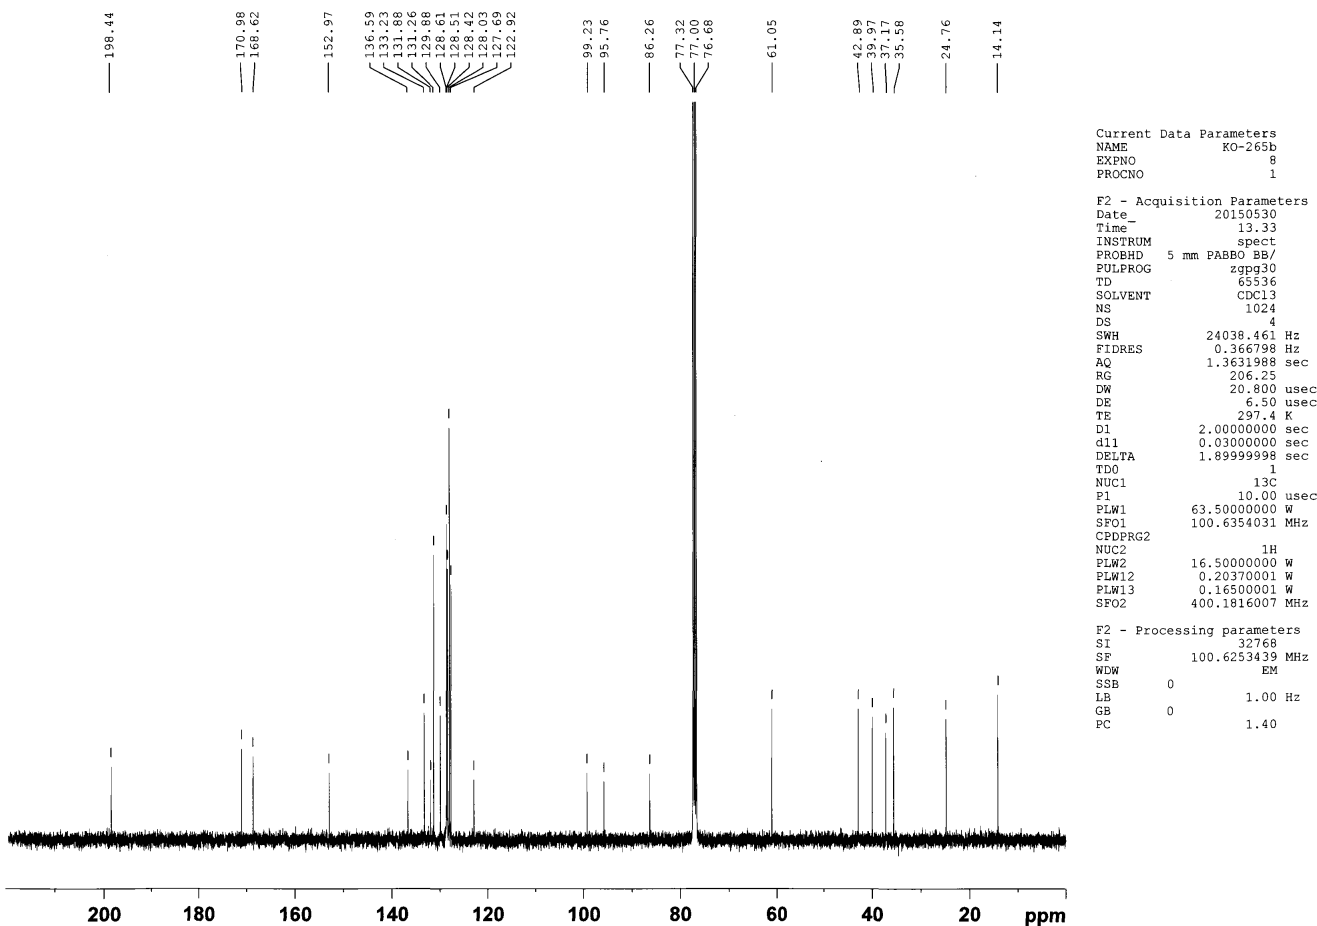



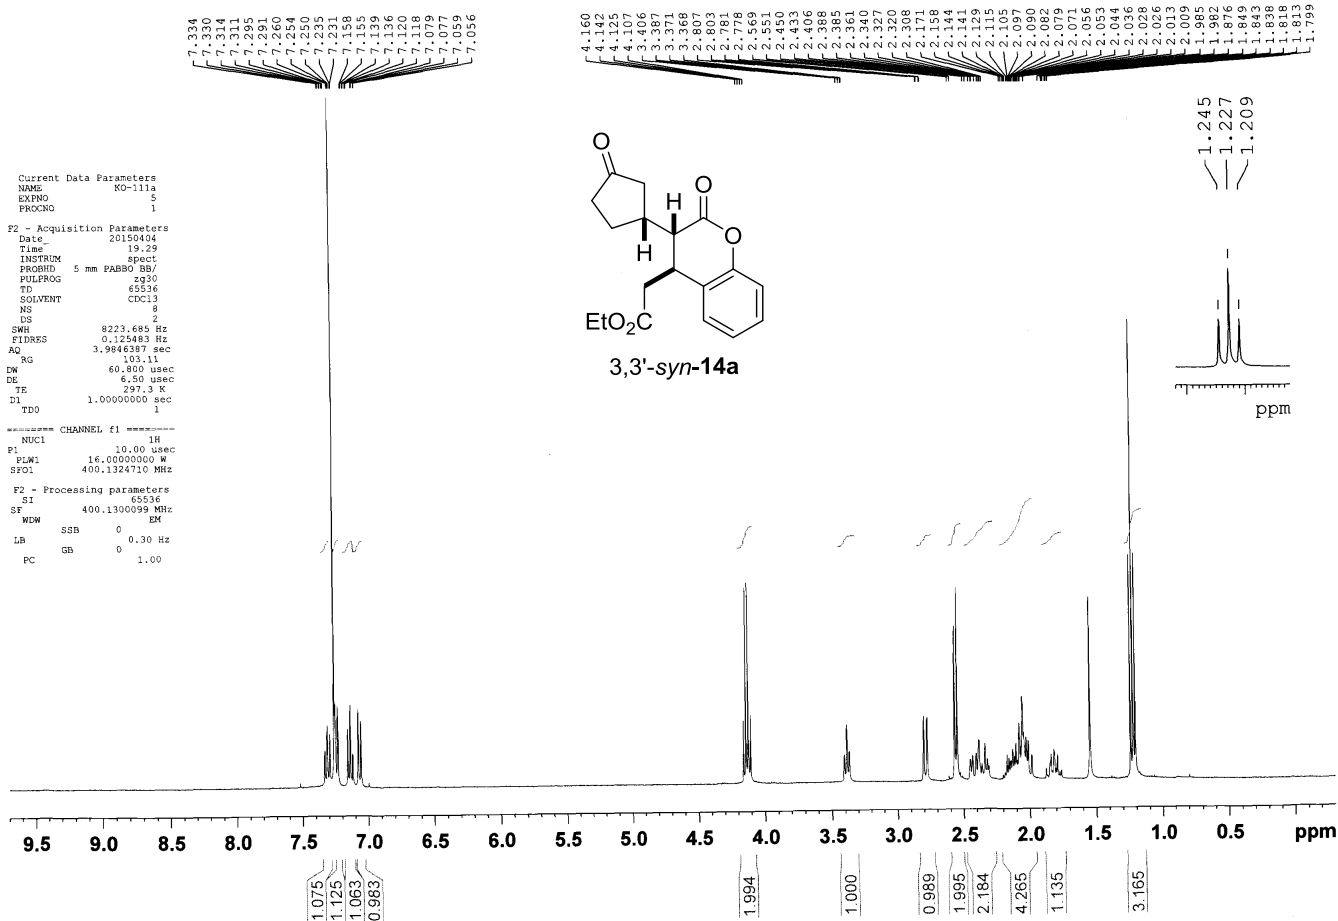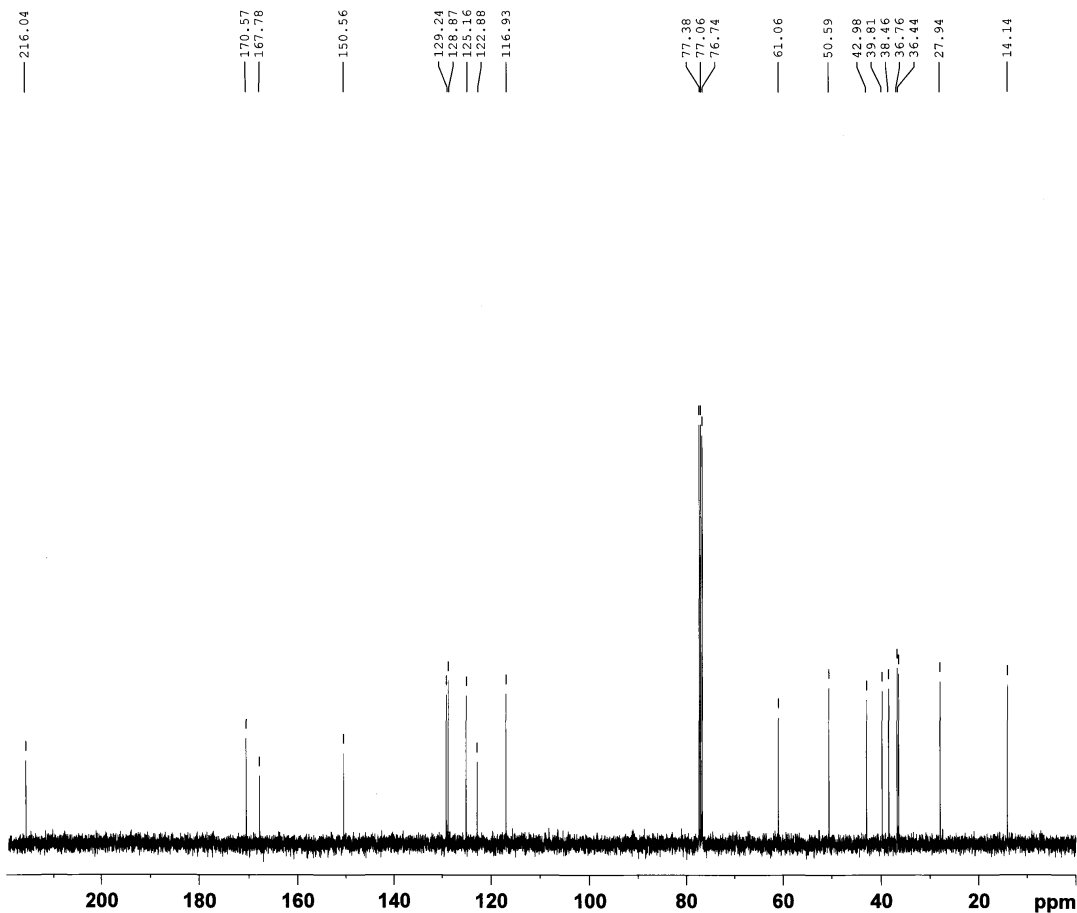

Current Data Parameters  
NAME KO-111a  
EXPNO 3  
PROCNO 1

F2 - Acquisition Parameters  
Date\_ 20140501  
Time 15.30  
INSTRUM spect  
PROBHD 5 mm PABBO BB/  
PULPROG zgpg30  
TD 65536  
SOLVENT CDC13  
NS 27  
DS 4  
SWH 24038.461 Hz  
FIDRES 0.366798 Hz  
AQ 1.3631988 sec  
RG 204.44  
DW 20.800 usec  
DE 6.50 usec  
TE 295.3 K  
D1 2.00000000 sec  
D11 0.03000000 sec  
TDO 1

CHANNEL f1  
NUC1 13C  
P1 10.00 usec  
PLW1 78.00000000 W  
SFO1 100.6228293 MHz

CHANNEL f2  
CPDPRG2 waltz16  
NUC2 1H  
PCPD2 90.00 usec  
PLW2 16.00000000 W  
PLW12 0.19753000 W  
PLW13 0.16000000 W  
SFO2 400.1316005 MHz

F2 - Processing parameters  
SI 32768  
SF 100.6127690 MHz  
WDW EM  
SSB 0  
LB 1.00 Hz  
GB 0  
PC 1.40

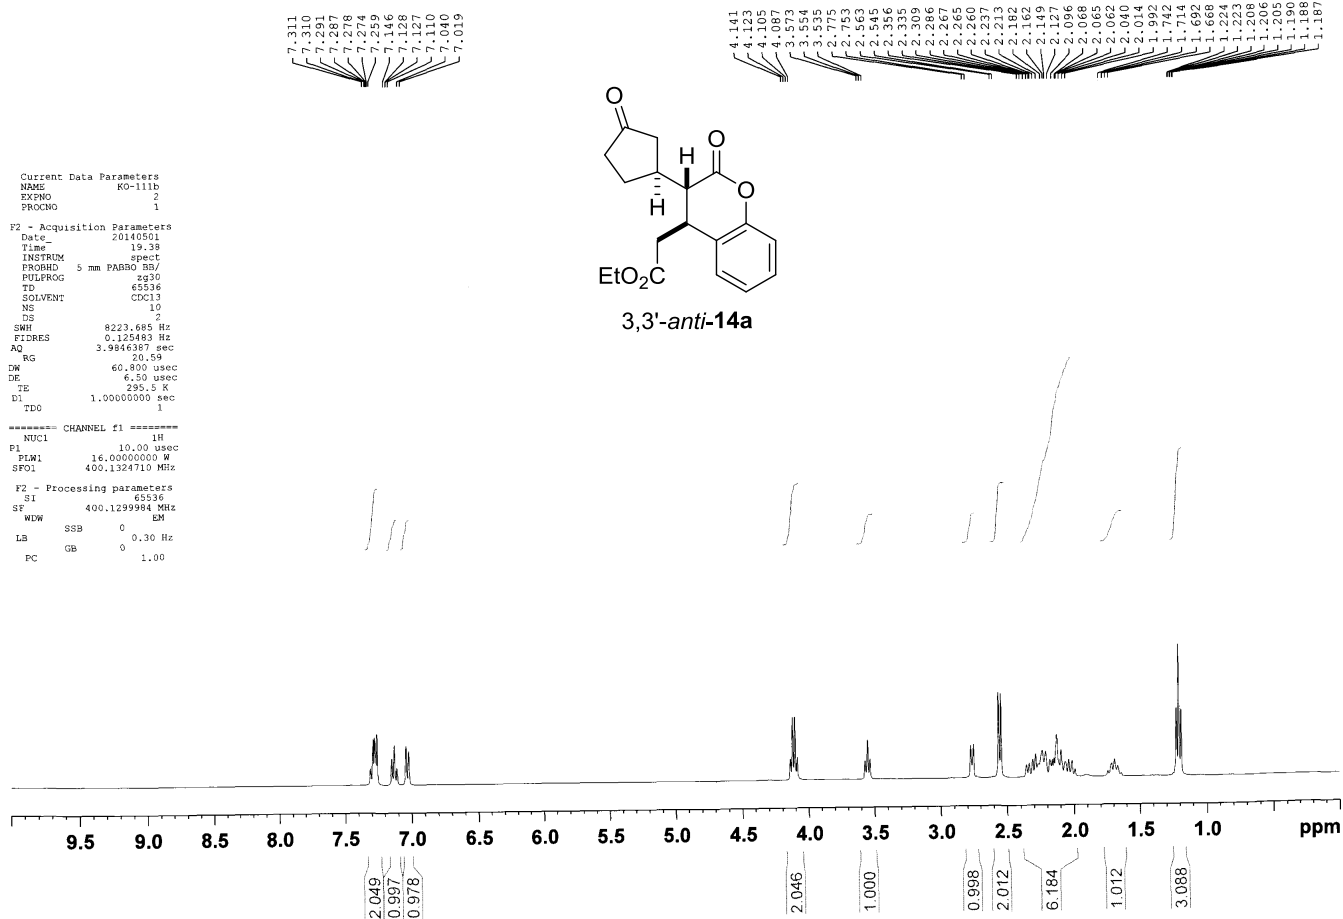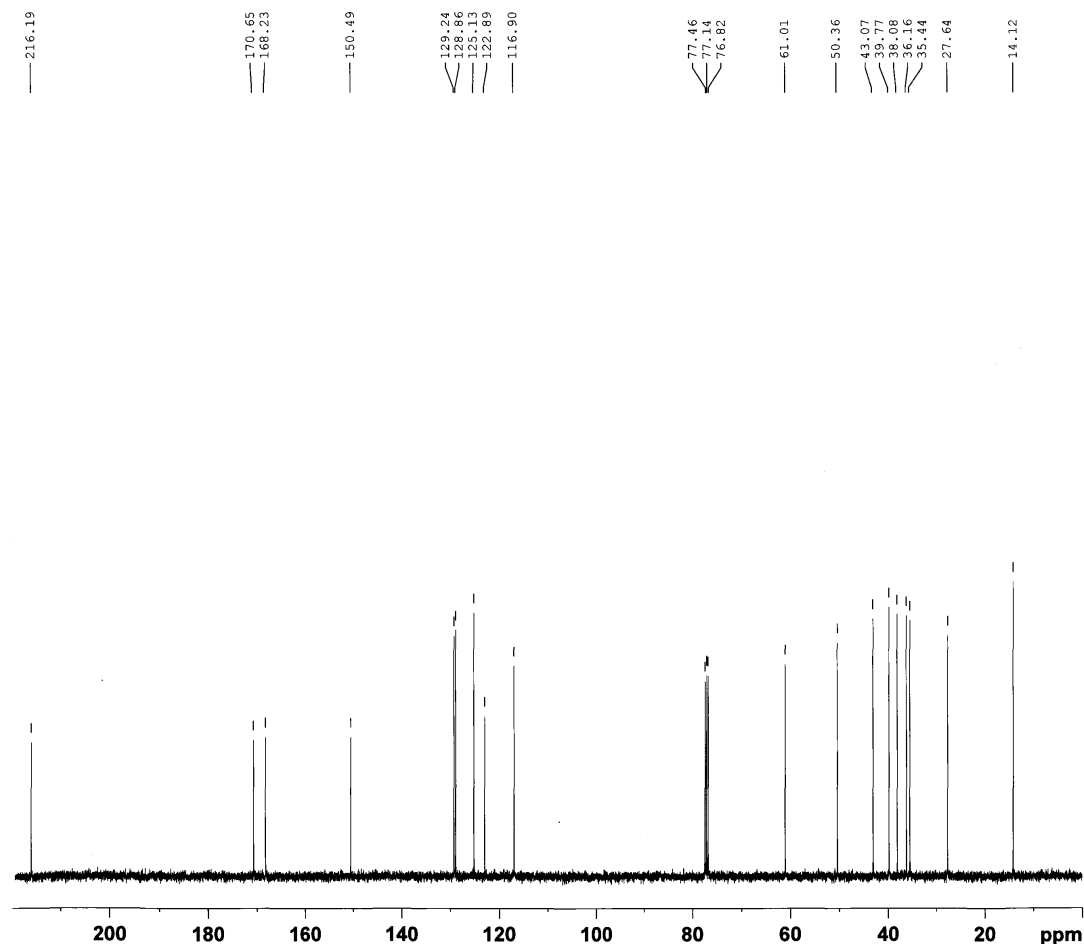

Current Data Parameters  
NAME KO-111b  
EXPNO 3  
PROCNO 1

F2 - Acquisition Parameters  
Date\_ 20140501  
Time 19.41  
INSTRUM spect  
PROBHD 5 mm PABBO BB/  
PULPROG zgpg30  
TD 65536  
SOLVENT CDCl3  
NS 26  
DS 4  
SWH 24038.461 Hz  
FIDRES 0.366798 Hz  
AQ 1.3631988 sec  
RG 204.44  
DW 20.800 usec  
DE 6.50 usec  
TE 295.7 K  
D1 2.00000000 sec  
D11 0.03000000 sec  
TDO 1

===== CHANNEL f1 =====  
NUC1 13C  
P1 10.00 usec  
PLW1 78.00000000 W  
SFO1 100.6228293 MHz

===== CHANNEL f2 =====  
CPDPRG2 waltz16  
NUC2 1H  
PCPD2 90.00 usec  
PLW2 16.00000000 W  
PLW12 0.19753000 W  
PLW13 0.16000000 W  
SFO2 400.1316005 MHz

F2 - Processing parameters  
SI 32768  
SF 100.6127690 MHz  
WDW EM  
SSB 0  
LB 1.00 Hz  
GB 0  
PC 1.40

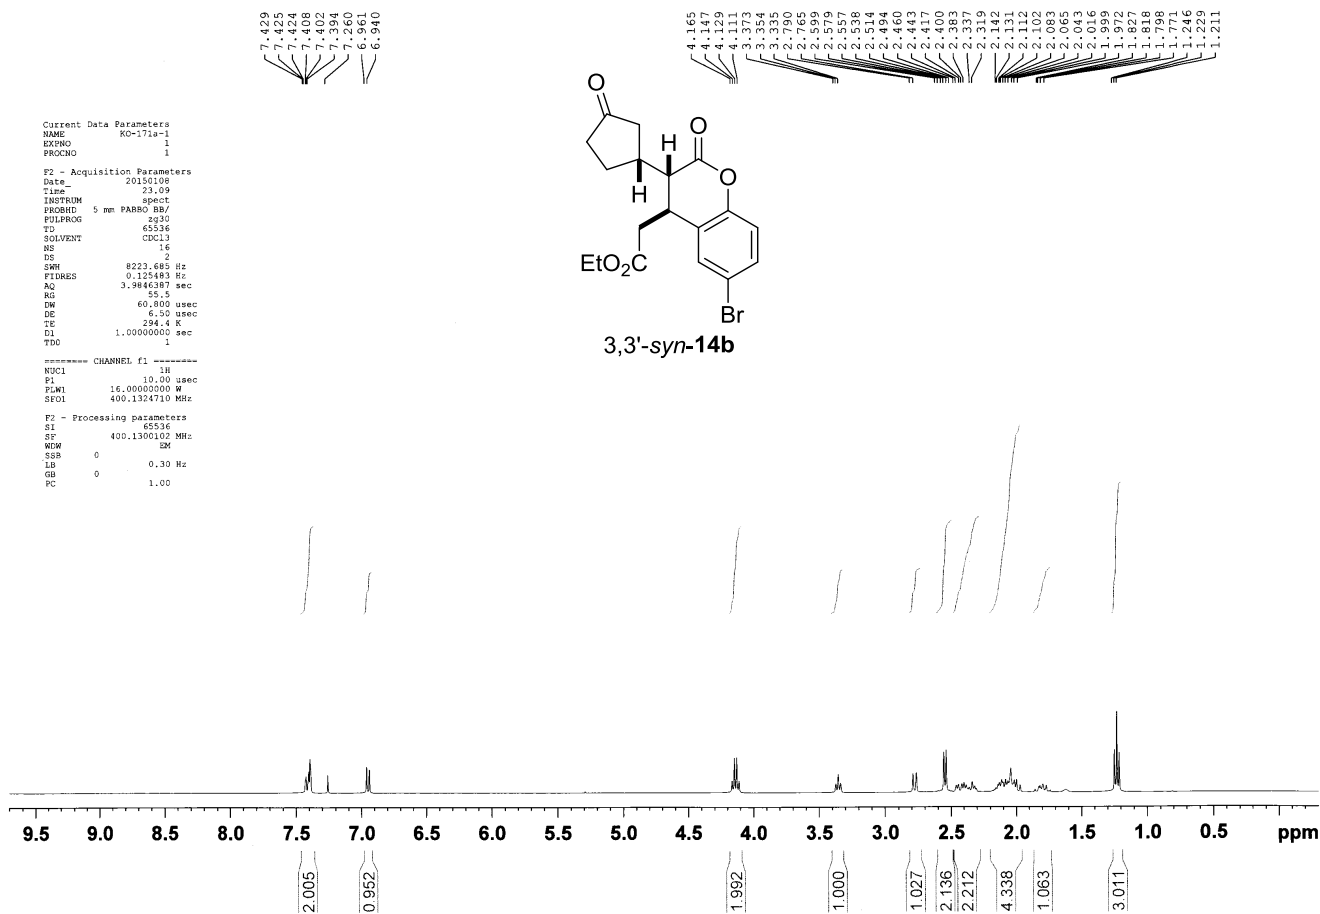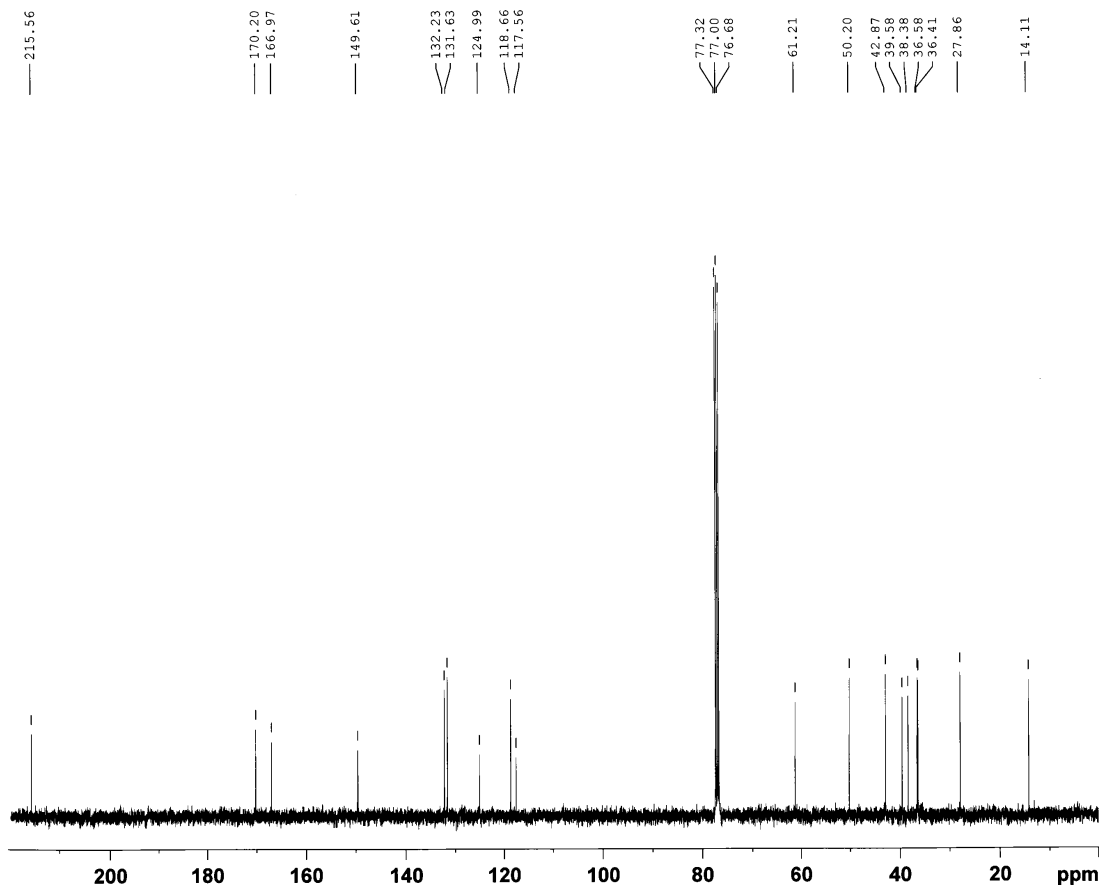

Current Data Parameters  
NAME KO-171a-1  
EXPNO 2  
PROCNO 1

F2 - Acquisition Parameters  
Date\_ 20150108  
Time\_ 23.11  
INSTRUM spect  
PROBHD 5 mm PABBO BB/  
PULPROG zgpg30  
TD 65536  
SOLVENT CDCl3  
NS 101  
DS 4  
SWH 24038.461 Hz  
FIDRES 0.366798 Hz  
AQ 1.3631988 sec  
RG 204.44  
DW 20.800 usec  
DE 6.50 usec  
TE 294.7 K  
D1 2.00000000 sec  
D11 0.03000000 sec  
TDO 1

===== CHANNEL f1 =====  
NUC1 13C  
P1 10.00 usec  
PLW1 78.00000000 W  
SFO1 100.6228293 MHz

===== CHANNEL f2 =====  
CPDPRG2 waltz16  
NUC2 1H  
PCPD2 90.00 usec  
PLW2 16.00000000 W  
PLW12 0.19753000 W  
PLW13 0.16000000 W  
SFO2 400.1316005 MHz

F2 - Processing parameters  
SI 32768  
SF 100.6127731 MHz  
WDW EM  
SSB 0  
LB 1.00 Hz  
GB 0  
PC 1.40

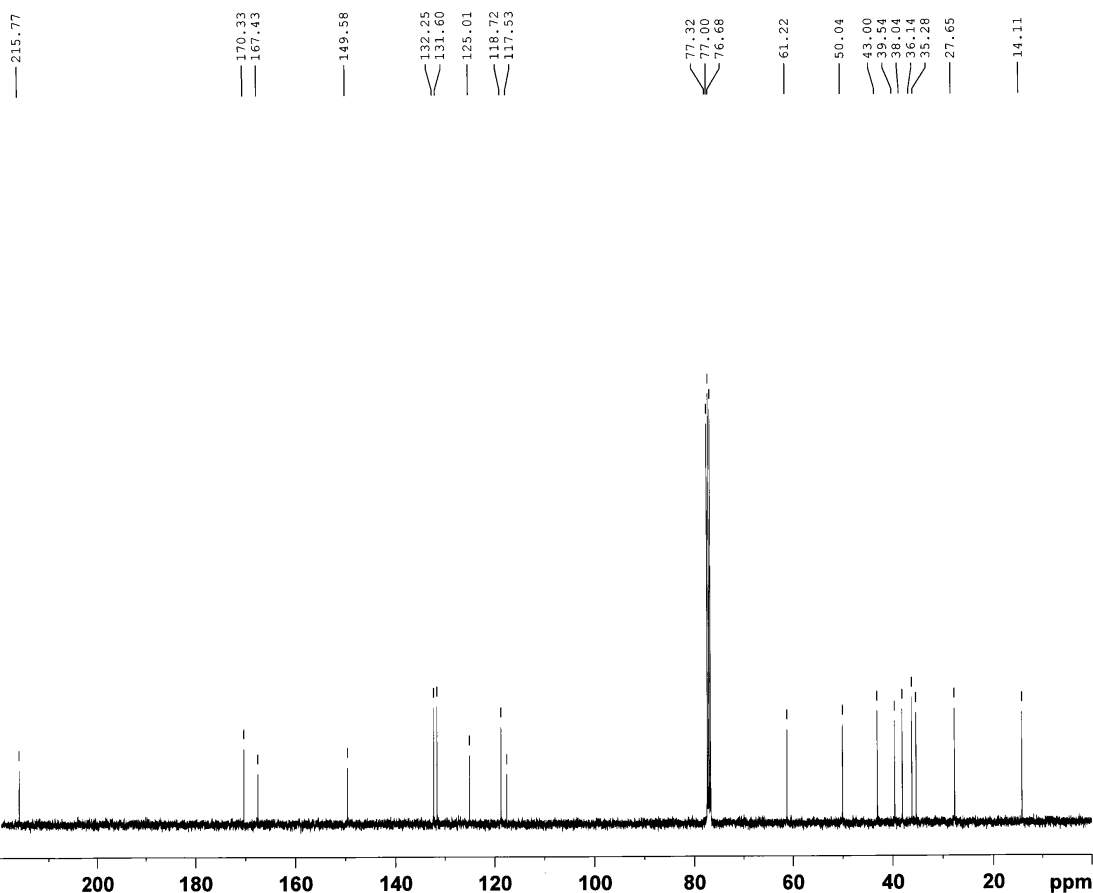

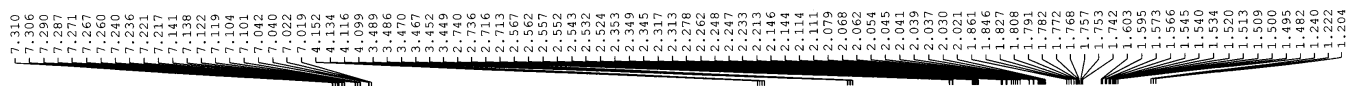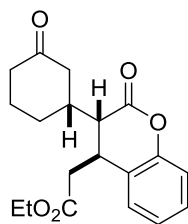

3,3'-syn-15a

Current Data Parameters  
NAME KO-119a  
EXPNO 2  
PROCNO 1

F2 - Acquisition Parameters  
Date\_ 20150331  
Time 16.42  
INSTRUM spect  
PROBHD 5 mm PABBO BB/  
PULPROG zg30  
TD 65536  
SOLVENT CDCl3  
NS 16  
DS 2  
SWH 8223.685 Hz  
FIDRES 0.125483 Hz  
AQ 3.9646387 sec  
RG 72.93  
DW 60.800 usec  
DE 6.50 usec  
TE 297.2 K  
D1 1.00000000 sec  
D10 1

===== CHANNEL f1 =====  
NUC1 1H  
P1 10.00 usec  
PLW1 16.00000000 W  
SFO1 400.1324710 MHz

F2 - Processing parameters  
SI 65536  
SF 400.1300098 MHz  
WDW EM  
SSB 0  
LB 0.30 Hz  
GB 0  
PC 1.00

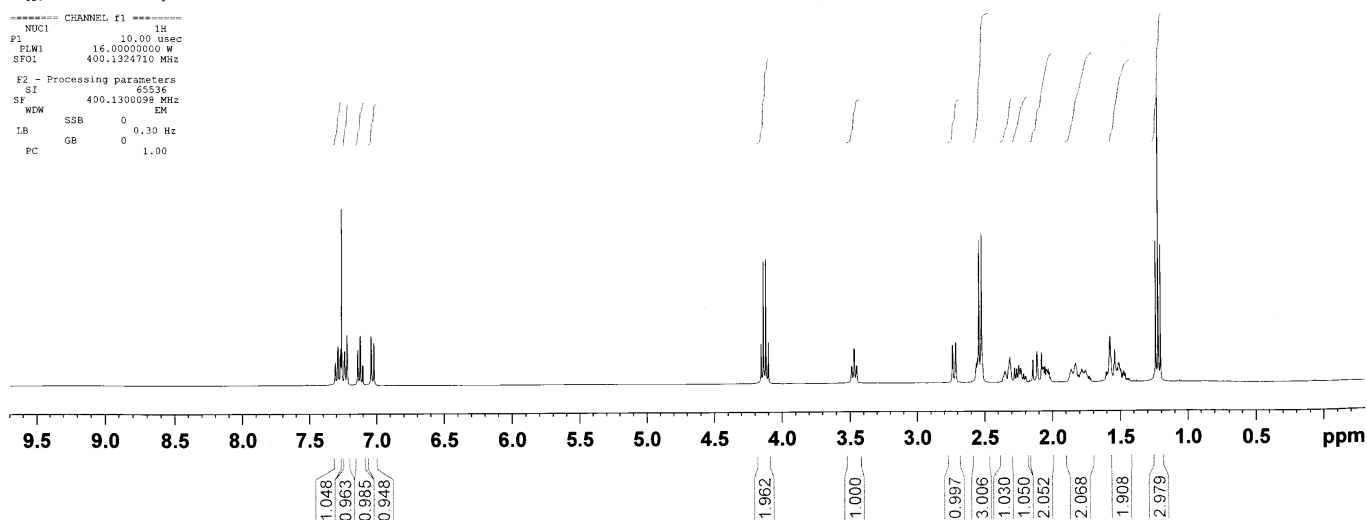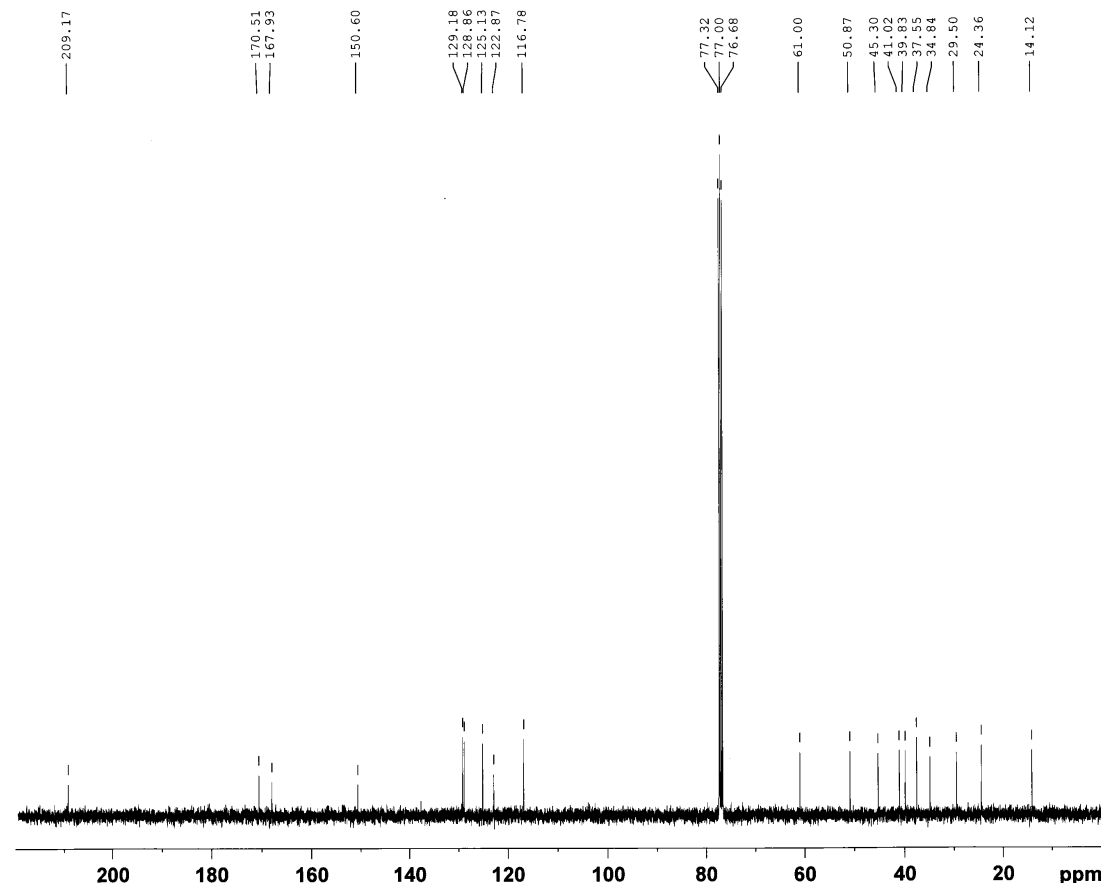

Current Data Parameters  
NAME KO-119a  
EXPNO 3  
PROCNO 1

F2 - Acquisition Parameters  
Date\_ 20150331  
Time 16.50  
INSTRUM spect  
PROBHD 5 mm PABBO BB/  
PULPROG zgpg30  
TD 65536  
SOLVENT CDCl3  
NS 143  
DS 4  
SWH 24038.461 Hz  
FIDRES 0.366798 Hz  
AQ 1.3631988 sec  
RG 204.44  
DW 20.800 usec  
DE 6.50 usec  
TE 297.9 K  
D1 2.00000000 sec  
D11 0.03000000 sec  
D10 1

===== CHANNEL f1 =====  
NUC1 13C  
P1 10.00 usec  
PLW1 78.00000000 W  
SFO1 100.6228293 MHz

===== CHANNEL f2 =====  
CPDPRG2 waltz16  
NUC2 1H  
PCPD2 90.00 usec  
PLW2 16.00000000 W  
PLW12 0.19753000 W  
PLW13 0.16000000 W  
SFO2 400.1316005 MHz

F2 - Processing parameters  
SI 32768  
SF 100.6127710 MHz  
WDW EM  
SSB 0  
LB 1.00 Hz  
GB 0  
PC 1.40

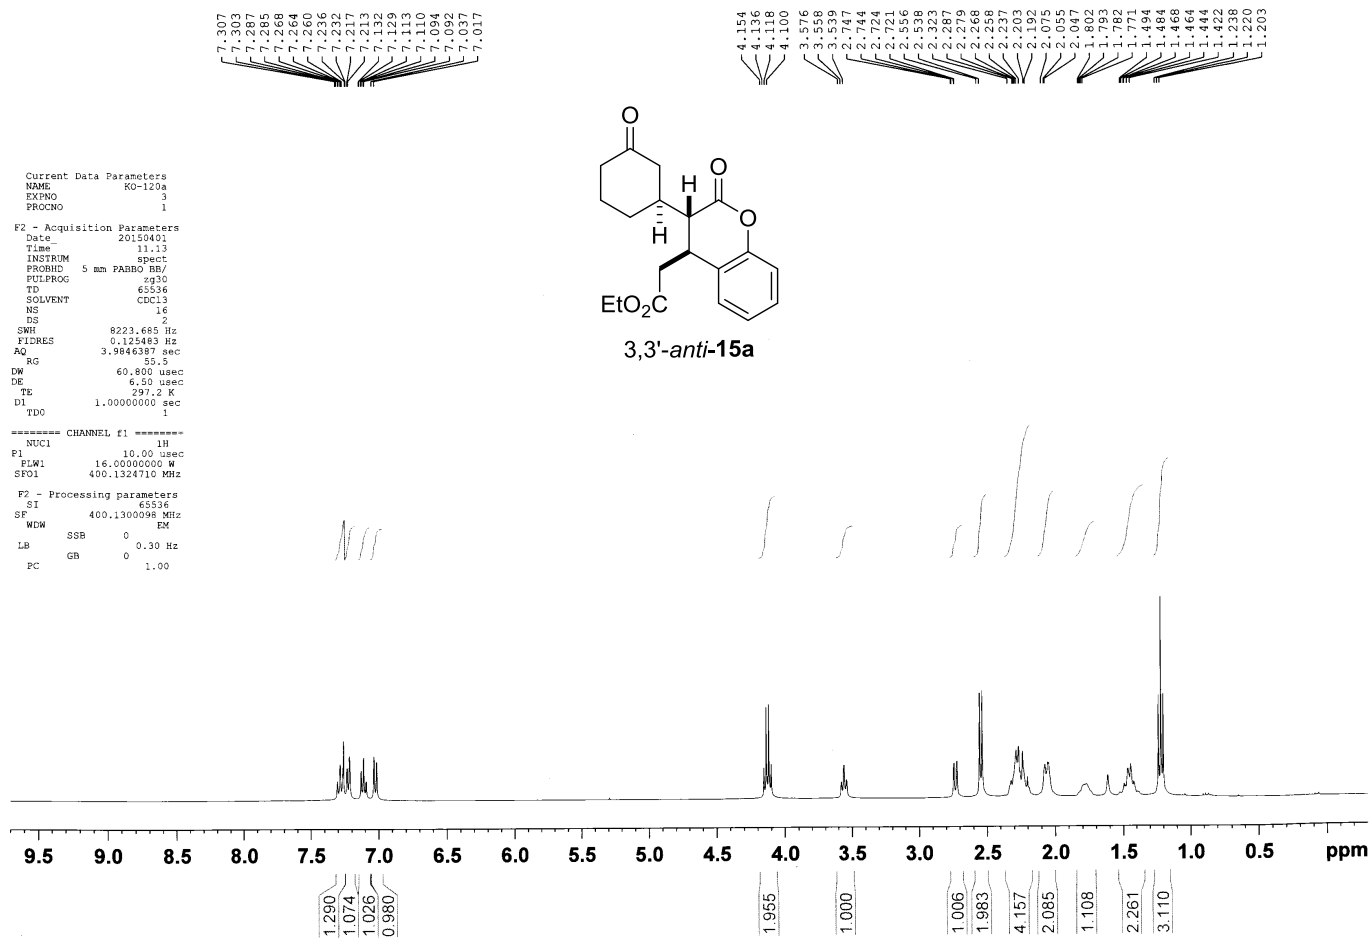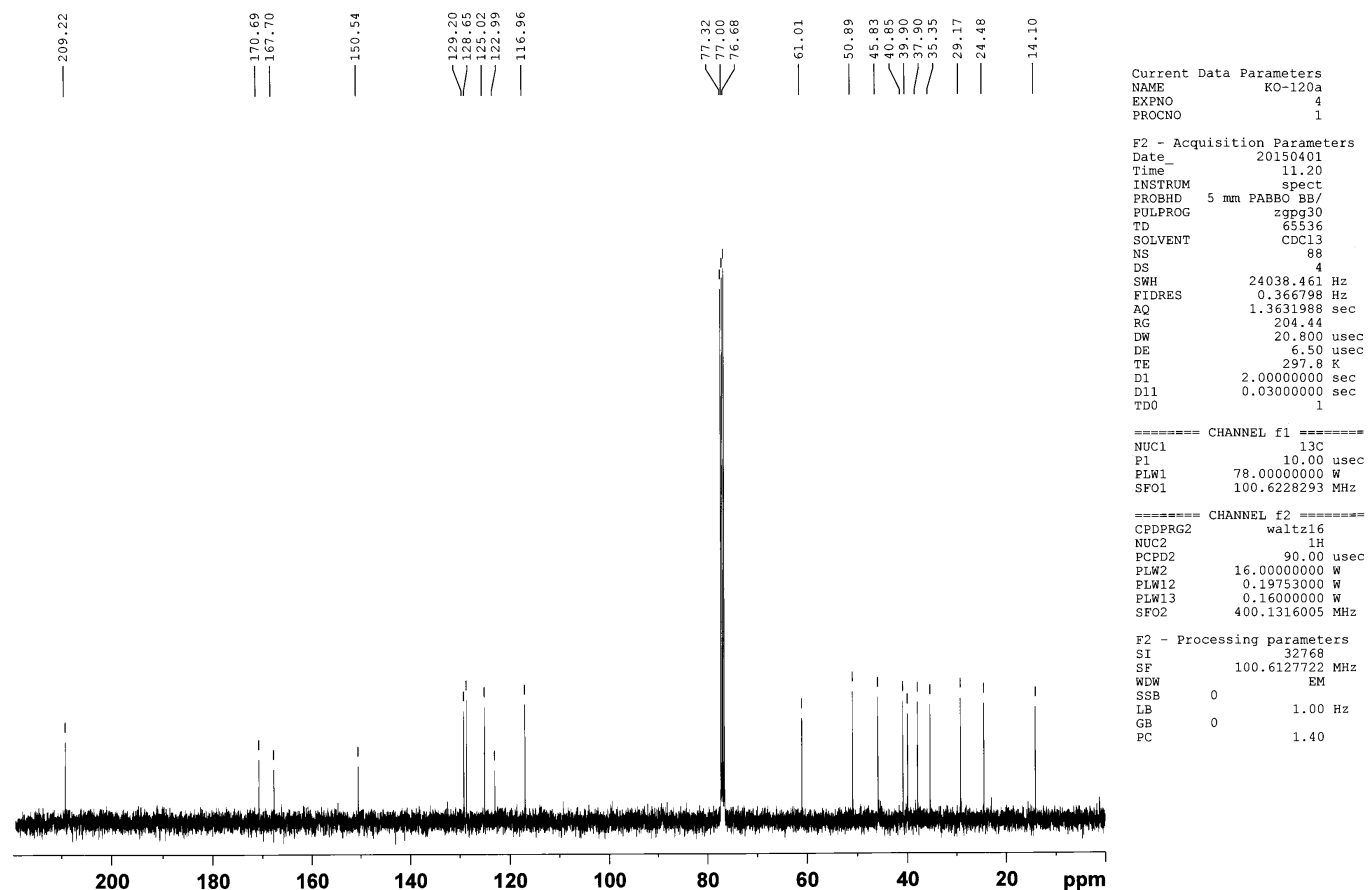

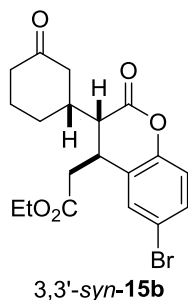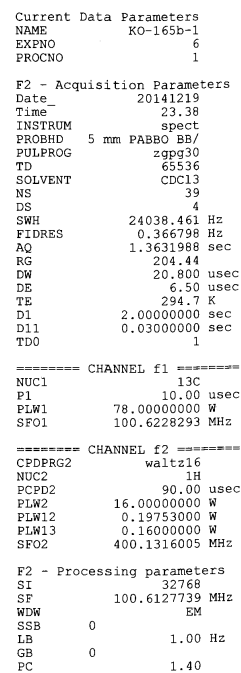

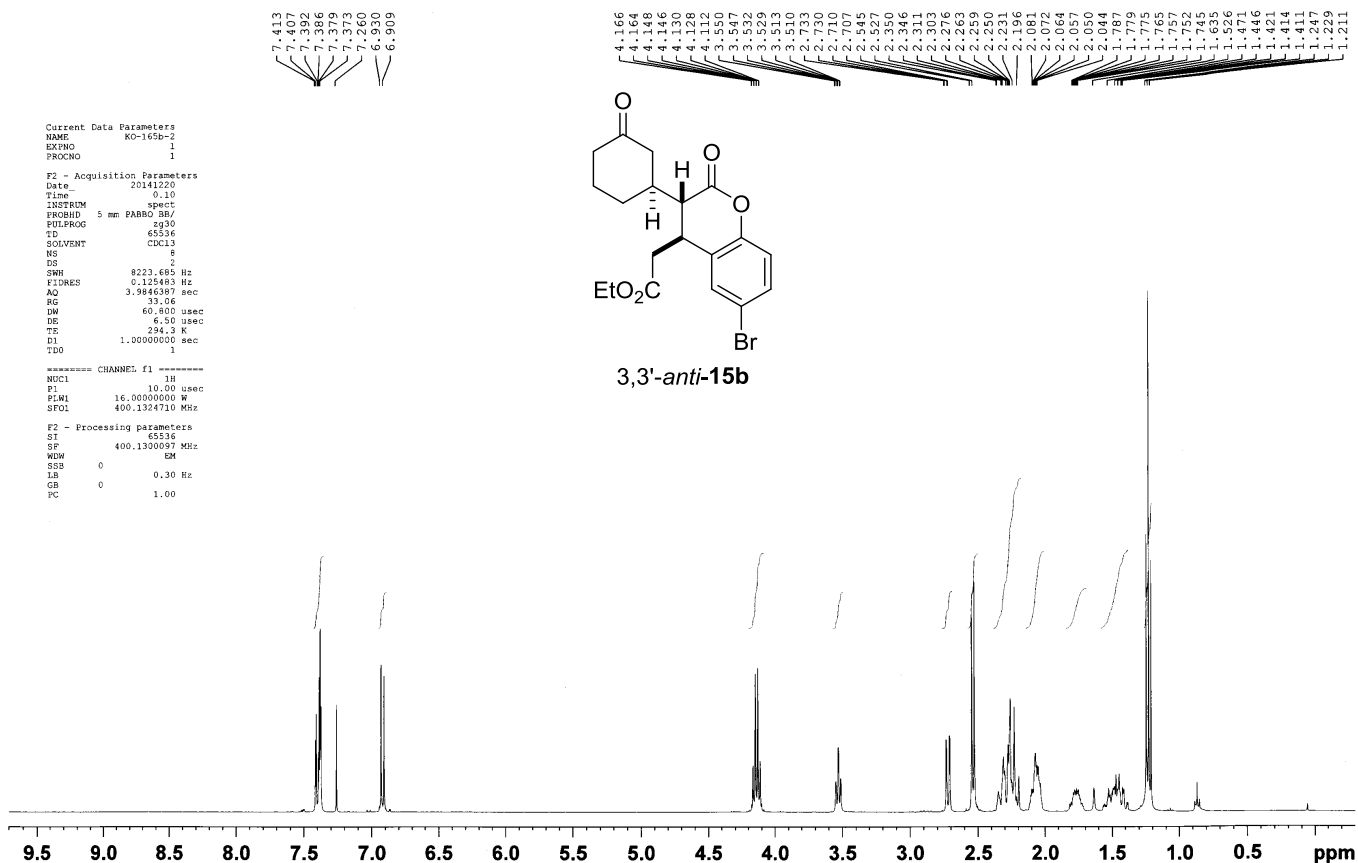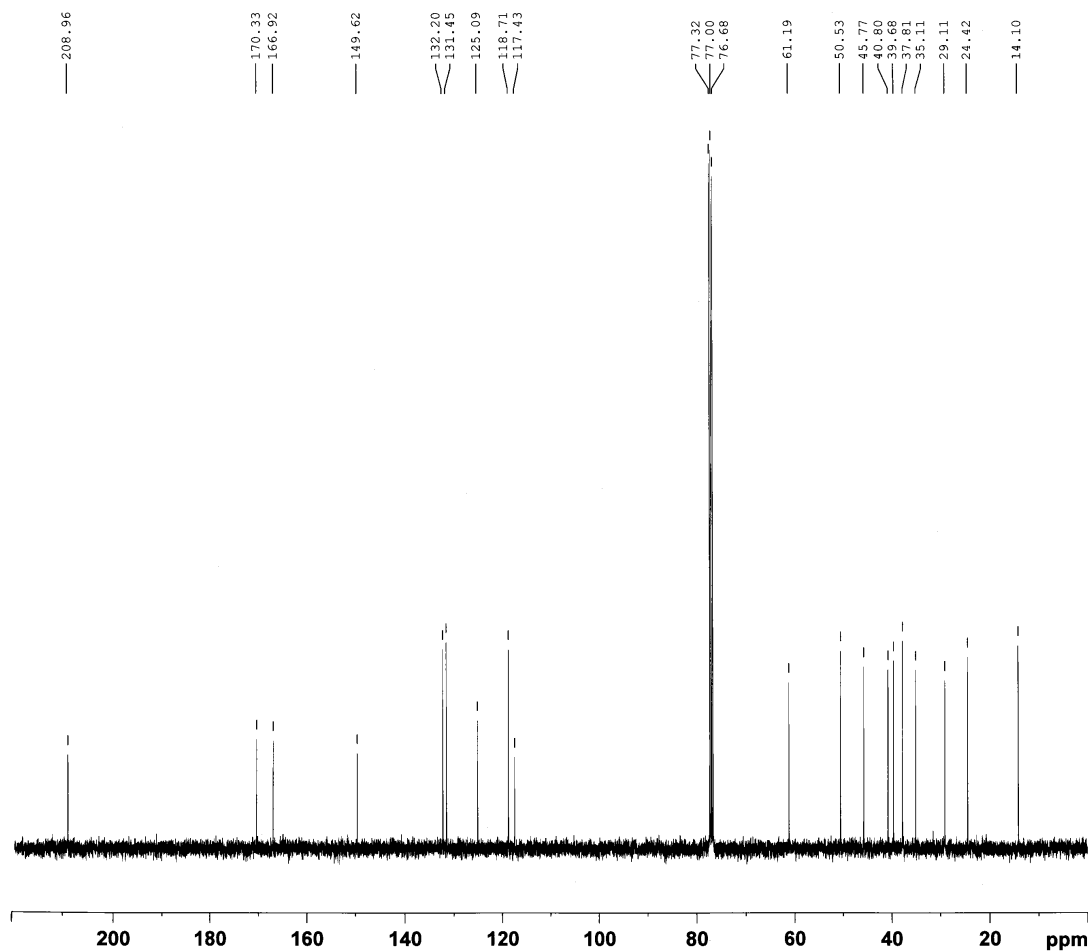

Current Data Parameters

NAME KO-165b-2  
EXPNO 2  
PROCNO 1

F2 - Acquisition Parameters

Date\_ 20141220  
Time 0.15  
INSTRUM spect  
PROBHD 5 mm PABBO BB/  
PULPROG zgpg30  
TD 65536  
SOLVENT CDCl3  
NS 90  
DS 4  
SWH 24038.461 Hz  
FIDRES 0.366798 Hz  
AQ 1.3631988 sec  
RG 204.44  
DW 20.800 usec  
DE 6.50 usec  
TE 294.8 K  
D1 2.00000000 sec  
D11 0.03000000 sec  
TD0 1

===== CHANNEL f1 =====

NUC1 13C  
P1 10.00 usec  
PLW1 78.00000000 W  
SFO1 100.6228293 MHz

===== CHANNEL f2 =====

CPDPRG2 waltz16  
NUC2 1H  
PCPD2 90.00 usec  
PLW2 16.00000000 W  
PLW12 0.19753000 W  
PLW13 0.16000000 W  
SFO2 400.1316005 MHz

F2 - Processing parameters

SI 32768  
SF 100.6127739 MHz  
WDW EM  
SSB 0  
LB 1.00 Hz  
GB 0  
PC 1.40



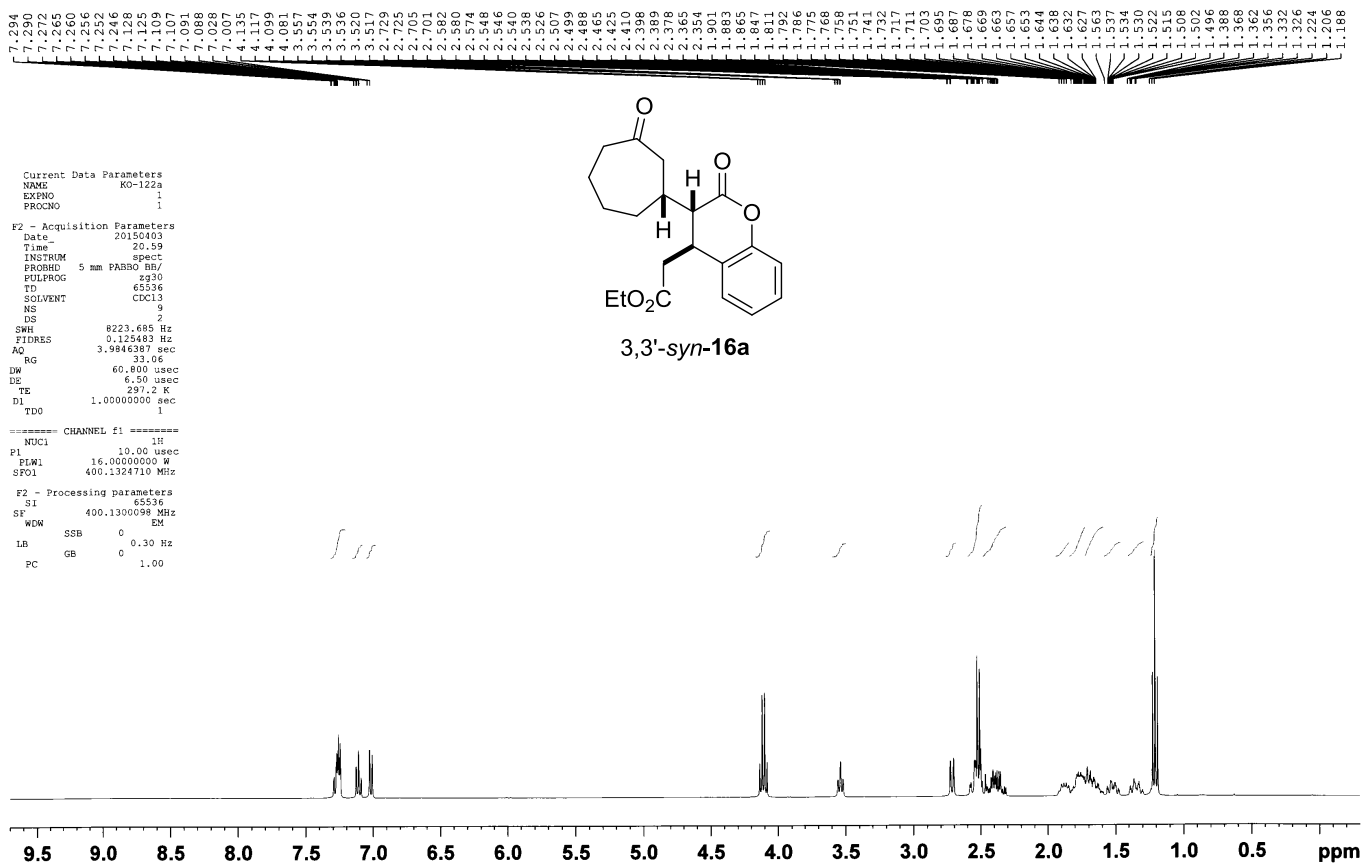

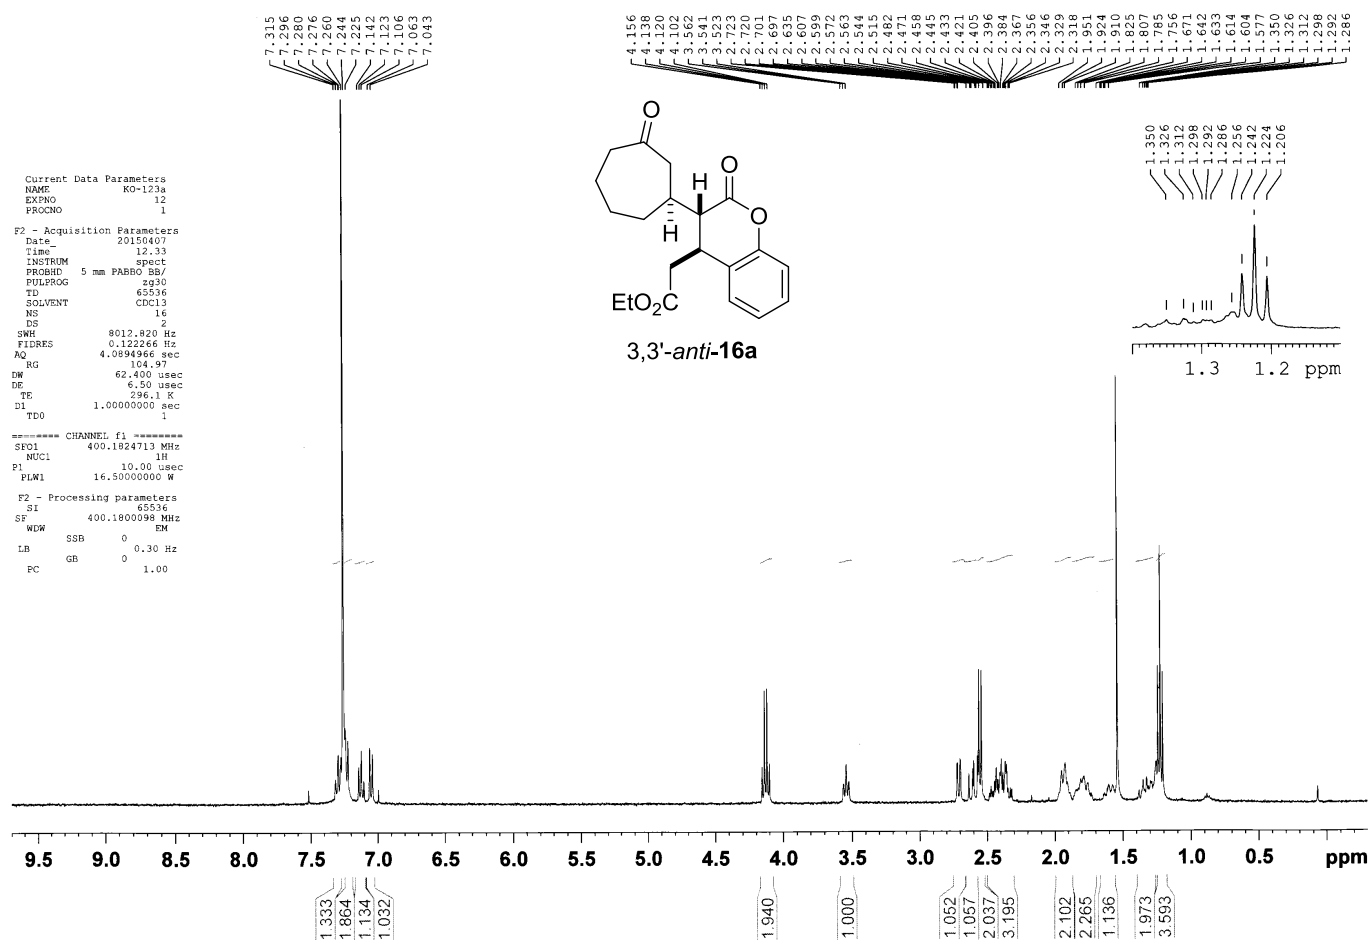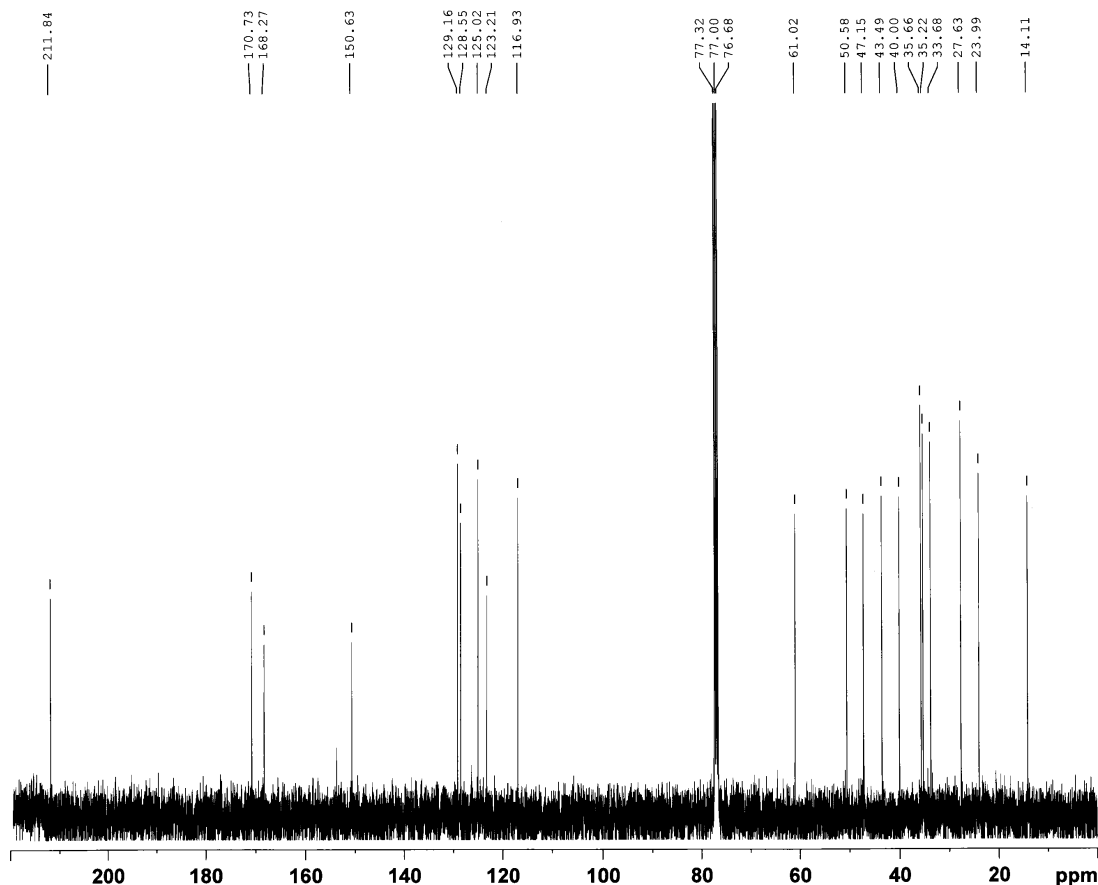

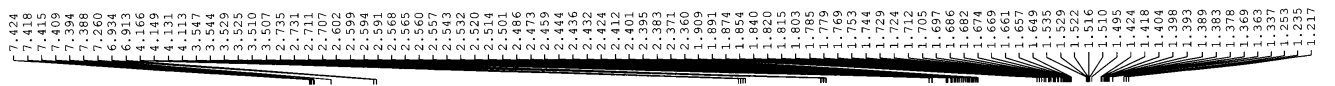

Current Data Parameters  
 NAME KO-234b-1  
 EXPNO 1  
 PROCNO 1  
 F2 - Acquisition Parameters  
 Date\_ 20150409  
 Time\_ 0.31  
 INSTRUM spect  
 PROBHD 5 mm PABBO BB/  
 PULPROG zgpg30  
 TD 65536  
 SOLVENT CDCl3  
 NS 16  
 DS 2  
 SWH 8223.685 Hz  
 FIDRES 0.125483 Hz  
 AQ 3.9846387 sec  
 RG 91.18  
 DW 60.800 usec  
 DE 6.50 usec  
 TE 294.9 K  
 D1 1.00000000 sec  
 TDO 1

===== CHANNEL f1 =====  
 NUC1 1H  
 P1 10.00 usec  
 PLW1 16.00000000 W  
 SFO1 400.1324710 MHz  
 F2 - Processing parameters  
 SI 65536  
 SF 400.1300097 MHz  
 WDW EM  
 SSB 0  
 LB 0.30 Hz  
 GB 0  
 PC 1.00

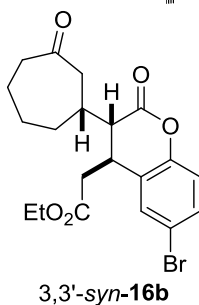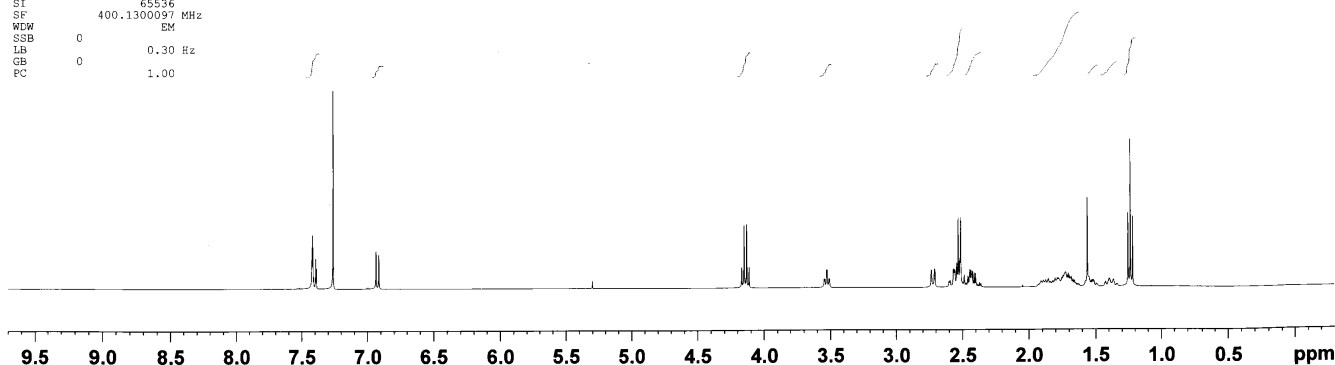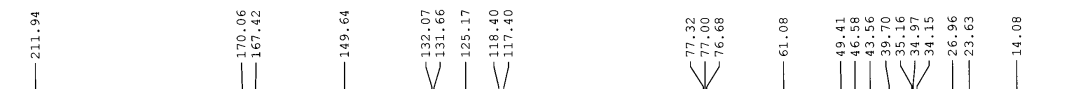

Current Data Parameters  
 NAME KO-234b-1  
 EXPNO 7  
 PROCNO 1  
 F2 - Acquisition Parameters  
 Date\_ 20150409  
 Time\_ 3.12  
 INSTRUM spect  
 PROBHD 5 mm PABBO BB/  
 PULPROG zgpg30  
 TD 65536  
 SOLVENT CDCl3  
 NS 49  
 DS 4  
 SWH 24038.461 Hz  
 FIDRES 0.366798 Hz  
 AQ 1.3631988 sec  
 RG 204.44  
 DW 20.800 usec  
 DE 6.50 usec  
 TE 295.3 K  
 D1 2.00000000 sec  
 D11 0.03000000 sec  
 TDO 1

===== CHANNEL f1 =====  
 NUC1 13C  
 P1 10.00 usec  
 PLW1 78.00000000 W  
 SFO1 100.6228293 MHz  
 ===== CHANNEL f2 =====  
 CPDPRG2 waltz16  
 NUC2 1H  
 PCPD2 90.00 usec  
 PLW2 16.00000000 W  
 PLW12 0.19750000 W  
 PLW13 0.16030000 W  
 SFO2 400.1316005 MHz

F2 - Processing parameters  
 SI 32768  
 SF 100.6127766 MHz  
 WDW EM  
 SSB 0  
 LB 1.00 Hz  
 GB 0  
 PC 1.40

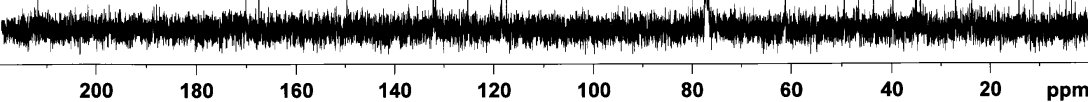

Current Data Parameters  
NAME KO-250a-2  
EXPNO 2  
PROCNO 1

F2 - Acquisition Parameters  
Date\_ 20150428  
Time 21:22  
INSTRUM spect  
PROBHD 5 mm PABBO BB/  
PULPROG zg30  
TD 65536  
SOLVENT CDC13  
NS 16  
DS 2  
SWH 8223.685 Hz  
FIDRES 0.125483 Hz  
AQ 3.9946387 sec  
RG 55.5  
DW 60.800 usec  
DE 6.50 usec  
TE 297.0 K  
D1 1.00000000 sec  
TDO 1

===== CHANNEL f1 =====  
NUC1 1H  
P1 10.00 usec  
PLW1 16.00000000 W  
SFO1 400.1324710 MHz

F2 - Processing parameters  
SI 65536  
SF 400.1300097 MHz  
WDW EM  
SSB 0  
LB 0.30 Hz  
GB 0  
PC 1.00

7.418  
7.413  
7.397  
7.391  
7.382  
7.376  
7.260  
6.949  
6.928

4.173  
4.163  
4.145  
4.127  
4.118  
4.109  
4.103  
3.520  
3.505  
3.502  
3.487  
3.484  
2.785  
2.783  
2.753  
2.727  
2.709  
2.705  
2.686  
2.682  
2.627  
2.599  
2.592  
2.564  
2.546  
2.528  
2.515  
2.508  
2.492  
2.480  
2.454  
2.442  
2.430  
2.404  
2.393  
2.381  
2.376  
2.355  
2.346  
2.338  
2.327  
2.327  
1.844  
1.815  
1.860  
1.855  
1.848  
1.837  
1.830  
1.824  
1.819  
1.813  
1.801  
1.792  
1.776  
1.759  
1.733  
1.716  
1.709  
1.697  
1.687

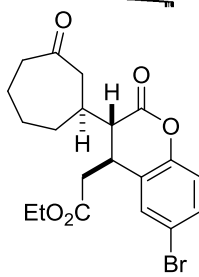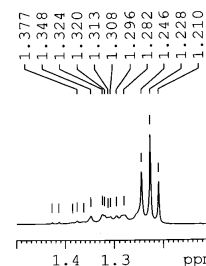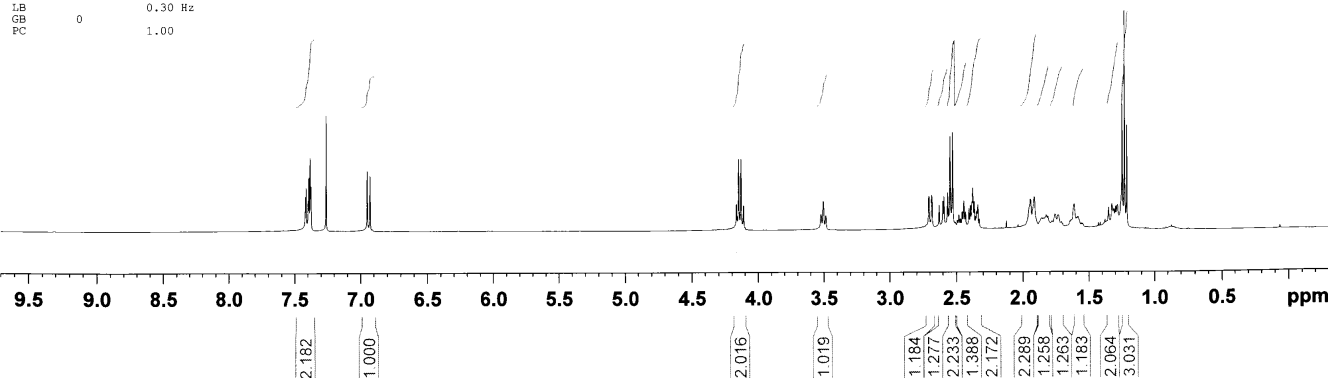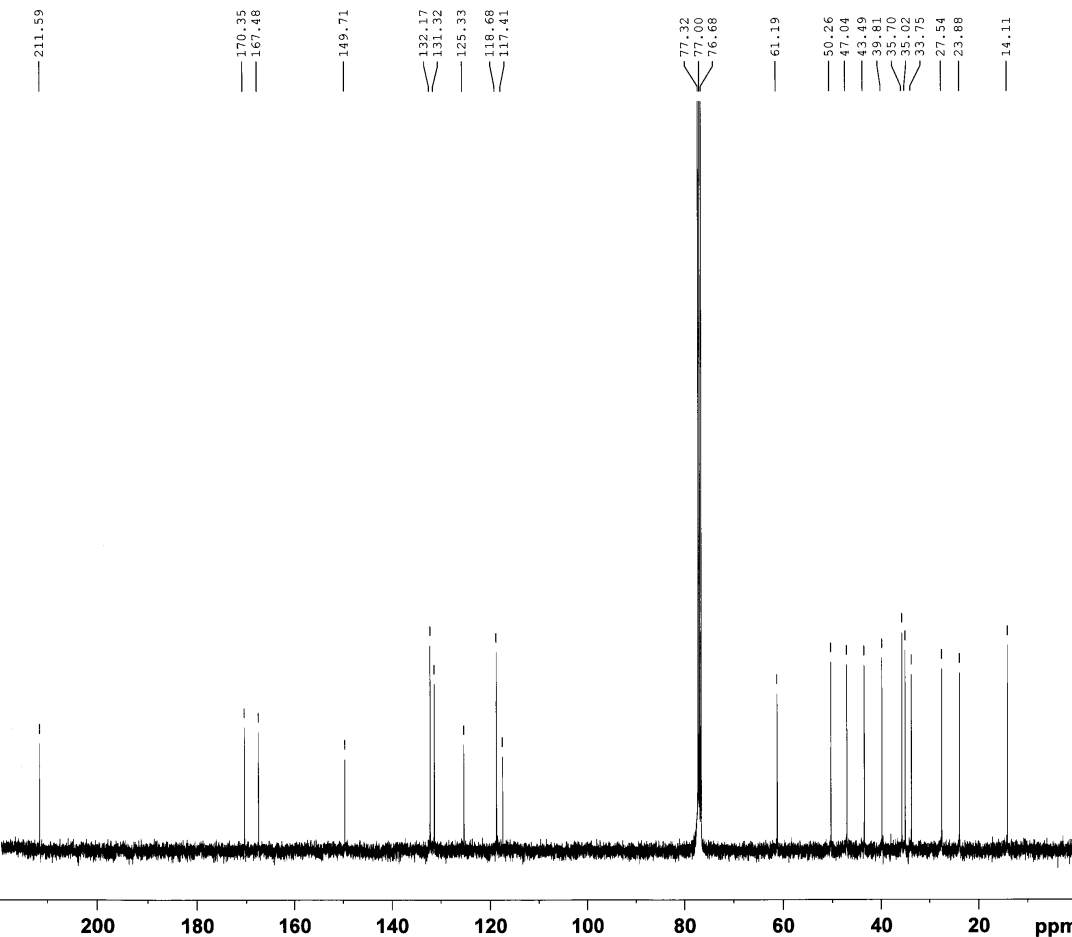

Current Data Parameters  
NAME KO-250a-2  
EXPNO 3  
PROCNO 1

F2 - Acquisition Parameters  
Date\_ 20150428  
Time 21:53  
INSTRUM spect  
PROBHD 5 mm PABBO BB/  
PULPROG zgpg30  
TD 65536  
SOLVENT CDC13  
NS 512  
DS 4  
SWH 24038.461 Hz  
FIDRES 0.366798 Hz  
AQ 1.3631988 sec  
RG 204.44  
DW 20.800 usec  
DE 6.50 usec  
TE 297.3 K  
D1 2.00000000 sec  
D11 0.03000000 sec  
TDO 1

===== CHANNEL f1 =====  
NUC1 13C  
P1 10.00 usec  
PLW1 78.00000000 W  
SFO1 100.6228293 MHz

===== CHANNEL f2 =====  
CPDPRG2 waltz16  
NUC2 1H  
PCPD2 90.00 usec  
PLW2 16.00000000 W  
PLW12 0.19753000 W  
PLW13 0.16000000 W  
SFO2 400.1316005 MHz

F2 - Processing parameters  
SI 32768  
SF 100.6127724 MHz  
WDW EM  
SSB 0  
LB 1.00 Hz  
GB 0  
PC 1.40

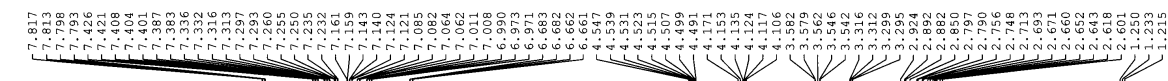

Current Data Parameters  
NAME KO-186d 2  
EXPNO 1  
PROCNO 1

F2 - Acquisition Parameters  
Date\_ 20150125  
Time 0.07  
INSTRUM spect  
PROBHD 5 mm PABBO BB/  
PULPROG zgpg30  
TD 65536  
SOLVENT CDCl3  
NS 8  
DS 2  
SWH 8223.485 Hz  
FIDRES 0.125483 Hz  
AQ 3.9846387 sec  
RG 62.25  
WM 60.800 usec  
DE 6.50 usec  
TE 294.0 K  
D1 1.00000000 sec  
FDO

===== CHANNEL f1 =====  
NUC1 1H  
P1 10.00 usec  
PLW1 16.00000000 W  
SFO1 400.1324710 MHz

F2 - Processing parameters  
SI 65536  
SF 400.1300097 MHz  
WDW EM  
SSB 0  
LB 0.30 Hz  
GB 0  
PC 1.00

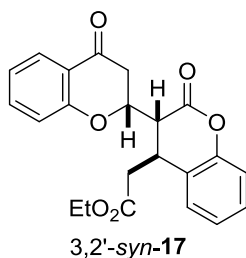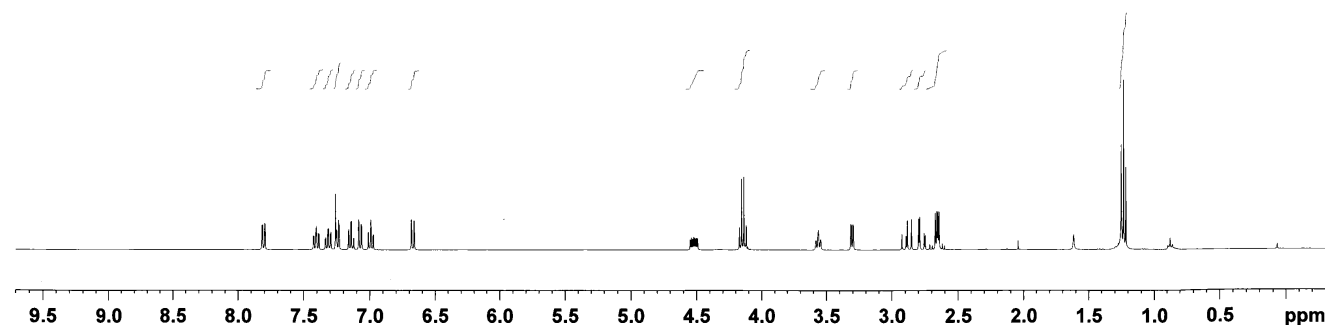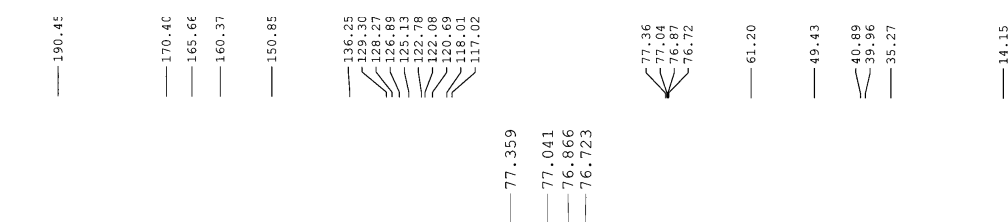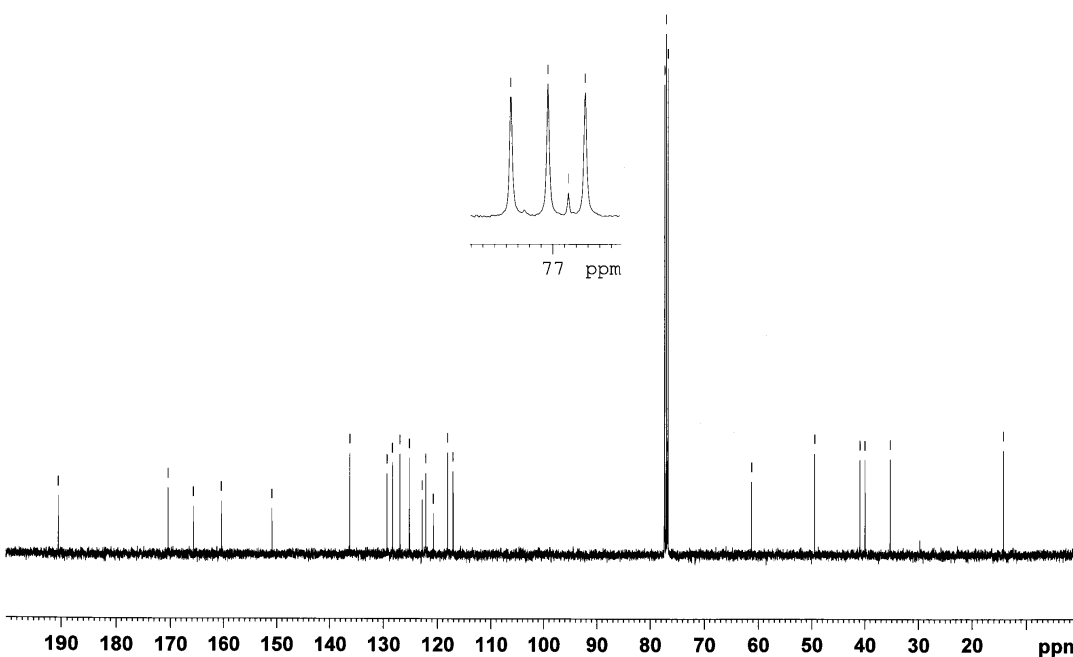

Current Data Parameters  
NAME KO-186d 2  
EXPNO 2  
PROCNO 1

F2 - Acquisition Parameters  
Date\_ 20150125  
Time 0.15  
INSTRUM spect  
PROBHD 5 mm PABBO BB/  
PULPROG zgpg30  
TD 65536  
SOLVENT CDCl3  
NS 159  
DS 4  
SWH 24038.461 Hz  
FIDRES 0.366798 Hz  
AQ 1.3631988 sec  
RG 204.44  
DW 20.800 usec  
DE 6.50 usec  
TE 294.4 K  
D1 2.00000000 sec  
D11 0.03000000 sec  
TD0 1

===== CHANNEL f1 =====  
NUC1 13C  
P1 10.00 usec  
PLW1 78.00000000 W  
SFO1 100.6228293 MHz

===== CHANNEL f2 =====  
CPDPRG2 waltz16  
NUC2 1H  
PCPD2 90.00 usec  
PLW2 16.00000000 W  
PLW12 0.19753000 W  
PLW13 0.16000000 W  
SFO2 400.1316005 MHz

F2 - Processing parameters  
SI 32768  
SF 100.6127690 MHz  
WDW EM  
SSB 0  
LB 1.00 Hz  
GB 0  
PC 1.40

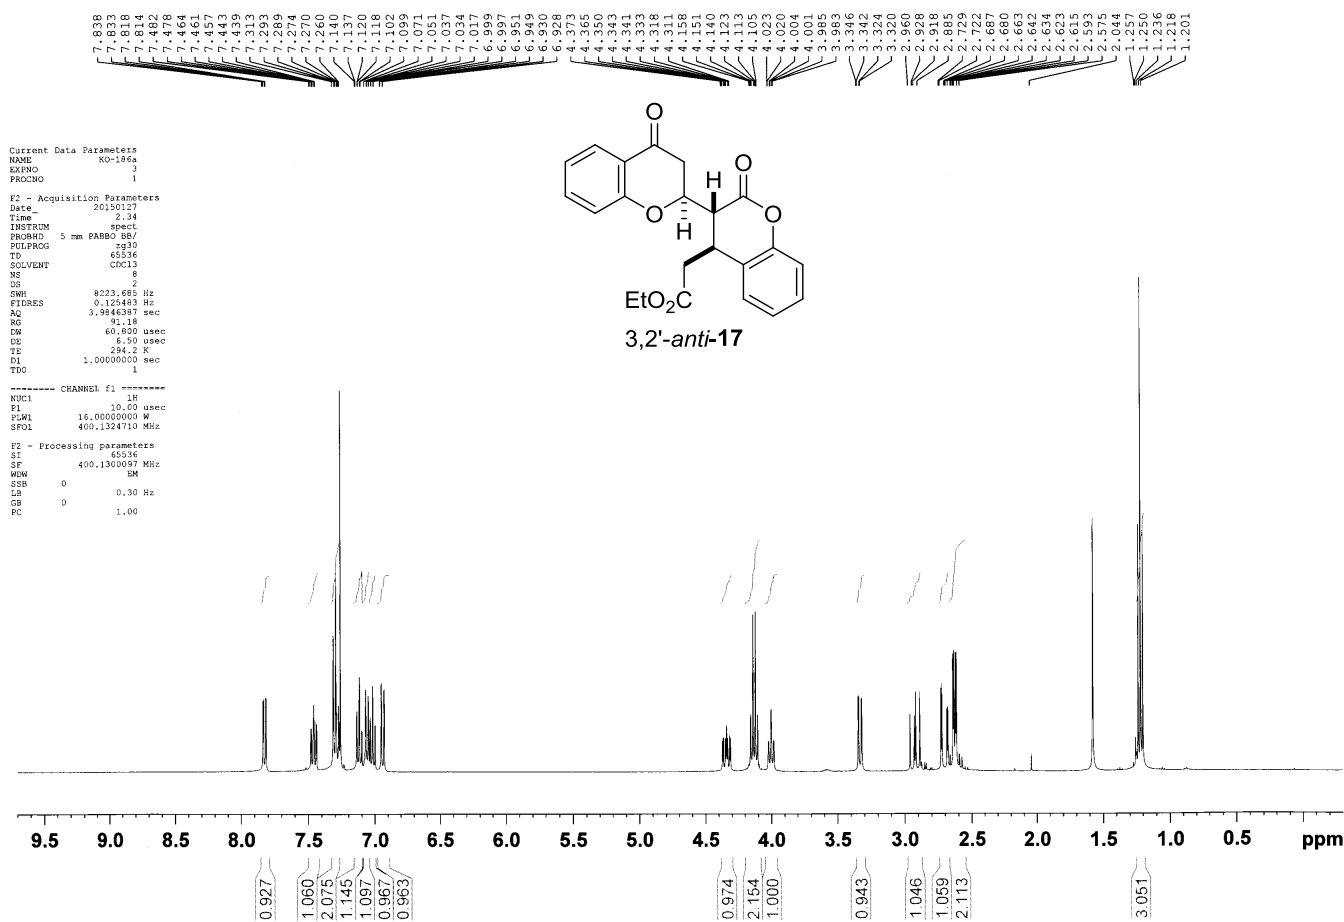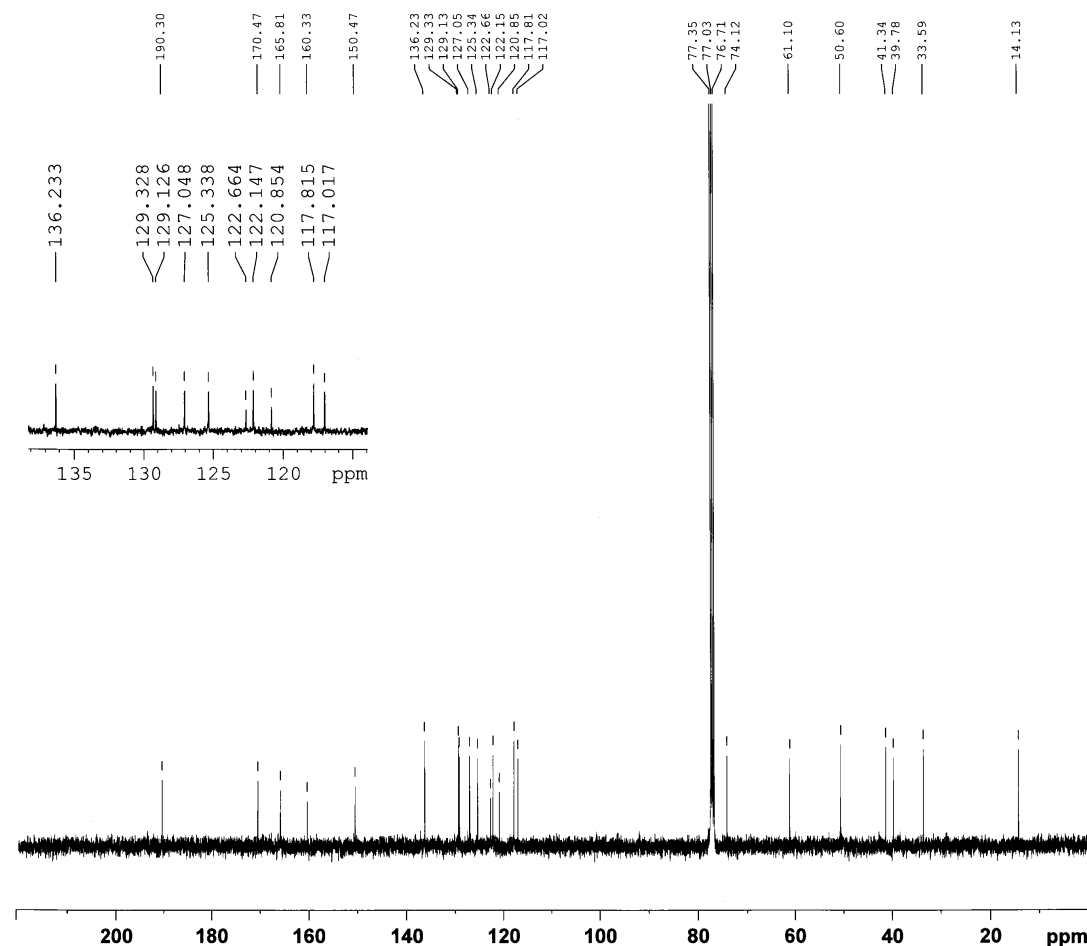

Current Data Parameters  
NAME KO-186a  
EXPNO 4  
PROCNO 1

F2 - Acquisition Parameters  
Date\_ 20150127  
Time 2.39  
INSTRUM spect  
PROBHD 5 mm PABBO BB/  
PULPROG zgpg30  
TD 65536  
SOLVENT CDCl3  
NS 412  
DS 4  
SWH 24038.461 Hz  
FIDRES 0.366798 Hz  
AQ 1.3631988 sec  
RG 204.44  
DW 20.800 usec  
DE 6.50 usec  
TE 294.6 K  
D1 2.00000000 sec  
D11 0.03000000 sec  
TD0 1

===== CHANNEL f1 =====  
NUC1 13C  
P1 10.00 usec  
PLW1 78.00000000 W  
SFO1 100.6228293 MHz

===== CHANNEL f2 =====  
CPDPRG2 waltz16  
NUC2 1H  
PCPD2 90.00 usec  
PLW2 16.00000000 W  
PLW12 0.19753000 W  
PLW13 0.16000000 W  
SFO2 400.1316005 MHz

F2 - Processing parameters  
SI 32768  
SF 100.6127690 MHz  
WDW EM  
SSB 0  
LB 1.00 Hz  
GB 0  
PC 1.40

Current Data Parameters  
 NAME KO-285a-3  
 EXPNO 2  
 PROCNO 1

F2 - Acquisition Parameters  
 Date\_ 20150117  
 Time\_ 22.50  
 INSTRUM spect  
 PROBHD 5 mm PABBO BB/  
 PULPROG zgpg30  
 TD 65536  
 SOLVENT CDCl3  
 NS 16  
 DS 2  
 SWH 8012.820 Hz  
 FIDRES 0.122266 Hz  
 AQ 4.0894966 sec  
 RG 104.97  
 DW 62.400 usec  
 DE 6.50 usec  
 TE 296.7 K  
 D1 1.00000000 sec  
 TDO 1

----- CHANNEL f1 -----  
 SFO1 400.1824713 MHz  
 NUC1 1H  
 P1 10.00 usec  
 PLW1 16.50000000 W

F2 - Processing parameters  
 SI 65536  
 SF 400.1800097 MHz  
 WDW EM  
 SSB 0  
 LB 0.30 Hz  
 GB 0  
 PC 1.00

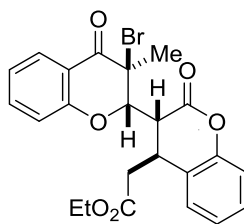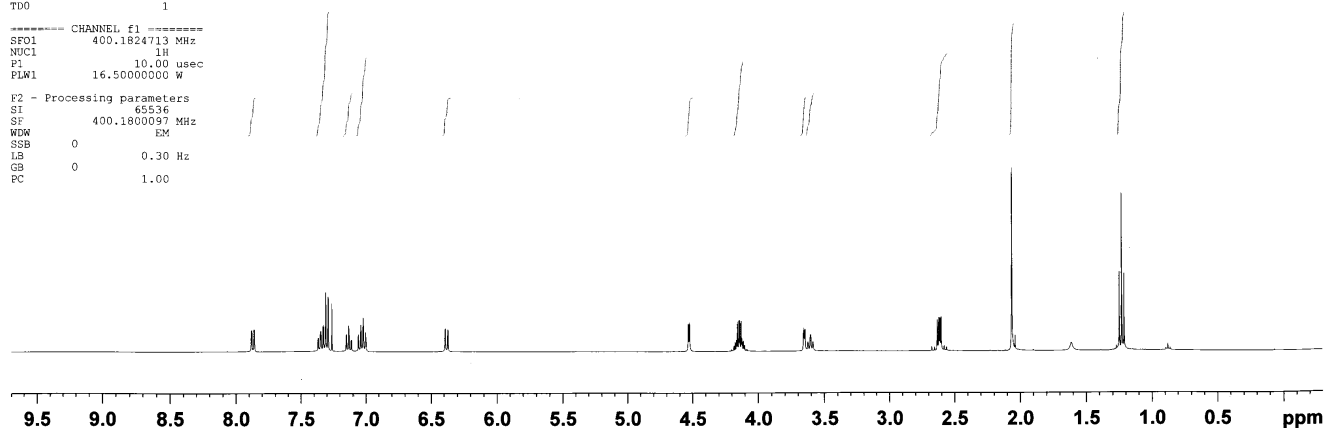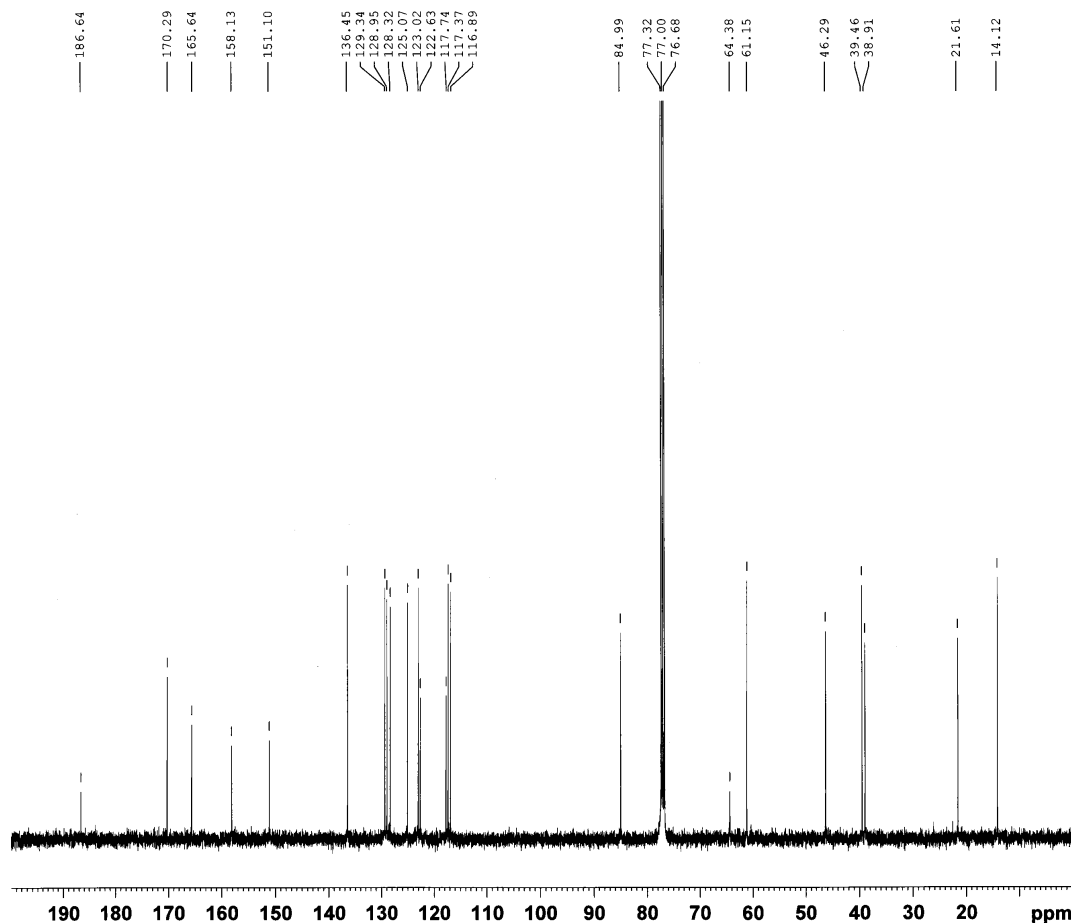

Current Data Parameters  
 NAME KO-285a-3  
 EXPNO 3  
 PROCNO 1

F2 - Acquisition Parameters  
 Date\_ 20150117  
 Time\_ 22.54  
 INSTRUM spect  
 PROBHD 5 mm PABBO BB/  
 PULPROG zgpg30  
 TD 65536  
 SOLVENT CDCl3  
 NS 499  
 DS 4  
 SWH 24038.461 Hz  
 FIDRES 0.366798 Hz  
 AQ 1.3631988 sec  
 RG 206.25  
 DW 20.800 usec  
 DE 6.50 usec  
 TE 297.6 K  
 D1 2.00000000 sec  
 d11 0.03000000 sec  
 DELTA 1.89999998 sec  
 TDO 1

NUC1 13C  
 P1 10.00 usec  
 PLW1 63.50000000 W  
 SFO1 100.6354031 MHz  
 CPDPRG2

NUC2 1H  
 PLW2 16.50000000 W  
 PLW12 0.20370001 W  
 PLW13 0.16500001 W  
 SFO2 400.1816007 MHz

F2 - Processing parameters  
 SI 32768  
 SF 100.6253452 MHz  
 WDW EM  
 SSB 0  
 LB 1.00 Hz  
 GB 0  
 PC 1.40

Current Data Parameters  
NAME KO-285a-2  
EXPNO 2  
PROCNO 1

F2 - Acquisition Parameters  
Date 20150714  
Time 21.37  
INSTRUM spect  
PROBHD 5 mm PABBO BB/  
PULPROG zg30  
TD 65536  
SOLVENT CDCl3  
NS 8  
DS 2  
SWH 8012.820 Hz  
FIDRES 0.122266 Hz  
AQ 4.0894966 sec  
RG 104.97  
DW 62.400 usec  
DE 6.50 usec  
TE 296.0 K  
D1 1.00000000 sec  
TDO 1

===== CHANNEL f1 =====  
SFO1 400.1824713 MHz  
NUC1 1H  
P1 10.00 usec  
PLW1 16.50000000 W

F2 - Processing parameters  
SI 65536  
SF 400.1800097 MHz  
WDW EM  
SSB 0  
LB 0.30 Hz  
GB 0  
PC 1.00

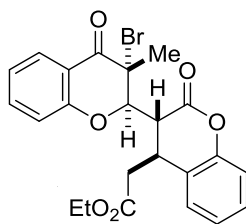

3,2'-anti-18

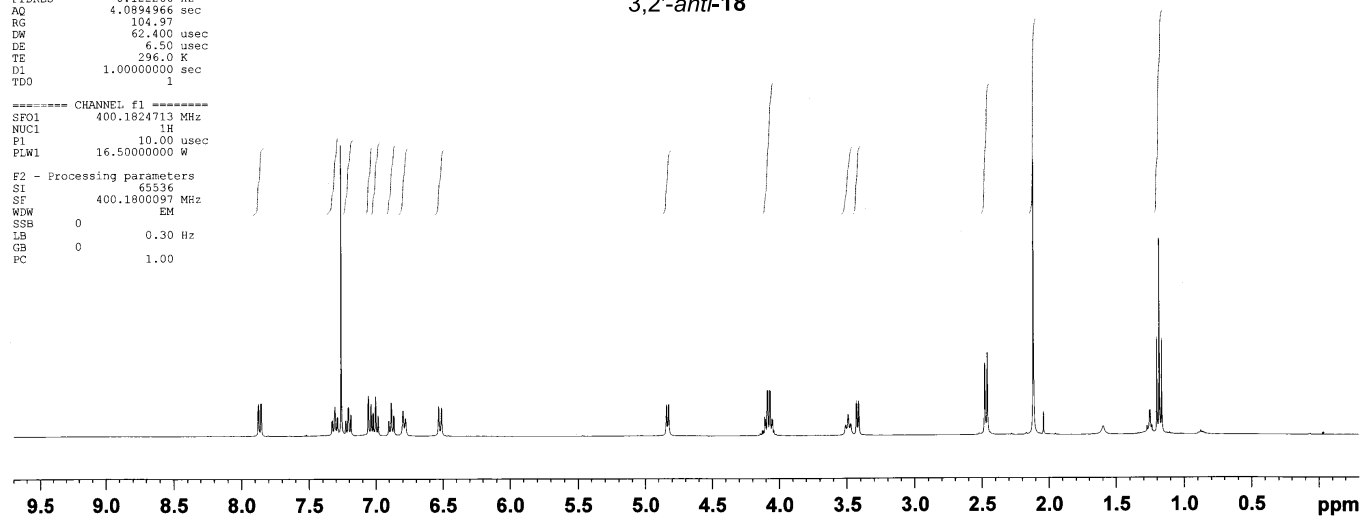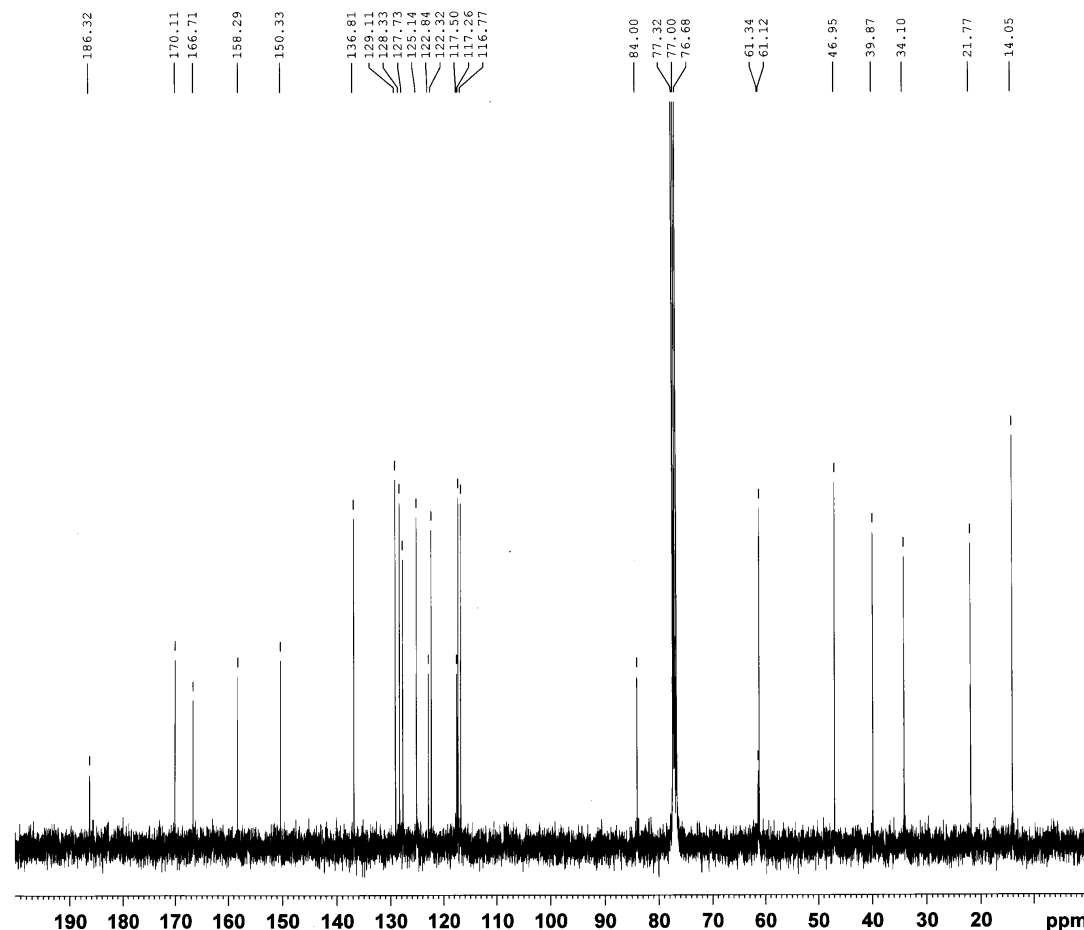

Current Data Parameters  
NAME KO-285a-2  
EXPNO 3  
PROCNO 1

F2 - Acquisition Parameters  
Date 20150714  
Time 21.41  
INSTRUM spect  
PROBHD 5 mm PABBO BB/  
PULPROG zgpg30  
TD 65536  
SOLVENT CDCl3  
NS 331  
DS 4  
SWH 24038.461 Hz  
FIDRES 0.366798 Hz  
AQ 1.3631988 sec  
RG 206.25  
DW 20.800 usec  
DE 6.50 usec  
TE 296.5 K  
D1 2.00000000 sec  
d11 0.03000000 sec  
DELTA 1.89999998 sec  
TDO 1  
NUC1 13C  
P1 10.00 usec  
PLW1 63.50000000 W  
SFO1 100.6354031 MHz  
CPDPRG2  
NUC2 1H  
PLW2 16.50000000 W  
PLW12 0.20370001 W  
PLW13 0.16500001 W  
SFO2 400.1816007 MHz

F2 - Processing parameters  
SI 32768  
SF 100.6253445 MHz  
WDW EM  
SSB 0  
LB 1.00 Hz  
GB 0  
PC 1.40



## 8. References

1. (a) Waller, F. J.; Barrett, A. G. M., Braddock, D. C.; Ramprasad, D.; McKinnell, R. M.; White, A. J. P.; Williams, D. J.; Ducray, R. J. *J. Org. Chem.* **1999**, *64*, 2910. (b) Yanai, H.; Takahashi, A.; Taguchi, T. *Tetrahedron* **2007**, *63*, 12149.
2. Ivanov, C.; Bojilowa, A. *Chem. Ber.* **1978**, *111*, 3755.
3. Yao, T.; Larock, R. C. *J. Org. Chem.* **2003**, *68*, 5936.
4. Belluti, F.; Perozzo, R.; Lauciello, L.; Colizzi, F.; Kostrewa, D.; Bisi, A.; Gobbi, A.; Rampa, A.; Bolognesi, M. L.; Recanatini, M.; Brun, R.; Scapozza, L.; Cavalli, A. *J. Med. Chem.* **2013**, *56*, 7516.
5. Erb, W.; Hellal, A.; Albini, M.; Rouden, J.; Blanchet, J. *Chem.–Eur. J.* **2014**, *20*, 6608.
6. Bellina, F.; Biagetti, M.; Carpita, A.; Rossi, R. *Tetrahedron* **2001**, *57*, 2857.
7. Slagbrand, T.; Lundberg, H.; Adolfsson, H. *Chem.–Eur. J.* **2014**, *20*, 16102.
8. Zhao, D.; Beiring, B.; Glorius, F. *Angew. Chem. Int. Ed.* **2013**, *52*, 8454.
